# Supplementary material for: Restrictive transfusion strategy for critically injured patients (RESTRIC) trial: a study protocol for a cluster-randomised, crossover non-inferiority trial
Source: PubMed Central journal article supplement — BMJ Open. 2020 Sep 6;10(9):e037238. doi: 10.1136/bmjopen-2020-037238 (PMC7478023; doi:10.1136/bmjopen-2020-037238), 2020-09-06
Supplement: bmjopen-2020-037238.draft_revisions.pdf [file bmjopen-2020-037238.draft_revisions.pdf]

# BMJ Open

BMJ Open is committed to open peer review. As part of this commitment we make the peer review history of every article we publish publicly available.

When an article is published we post the peer reviewers' comments and the authors' responses online. We also post the versions of the paper that were used during peer review. These are the versions that the peer review comments apply to.

The versions of the paper that follow are the versions that were submitted during the peer review process. They are not the versions of record or the final published versions. They should not be cited or distributed as the published version of this manuscript.

BMJ Open is an open access journal and the full, final, typeset and author-corrected version of record of the manuscript is available on our site with no access controls, subscription charges or pay-per-view fees (<http://bmjopen.bmj.com>).

If you have any questions on BMJ Open's open peer review process please email [info.bmjopen@bmj.com](mailto:info.bmjopen@bmj.com)

# BMJ Open

## Restrictive transfusion strategy for critically injured patients (RESTRIC) trial: A study protocol for a cluster-randomised, crossover non-inferiority trial

|                               |                                                                                                                                                                                                                                                                                                                                                                                                                                                                                                                                                                                                                                                                                                                                      |
|-------------------------------|--------------------------------------------------------------------------------------------------------------------------------------------------------------------------------------------------------------------------------------------------------------------------------------------------------------------------------------------------------------------------------------------------------------------------------------------------------------------------------------------------------------------------------------------------------------------------------------------------------------------------------------------------------------------------------------------------------------------------------------|
| Journal:                      | <i>BMJ Open</i>                                                                                                                                                                                                                                                                                                                                                                                                                                                                                                                                                                                                                                                                                                                      |
| Manuscript ID                 | bmjopen-2020-037238                                                                                                                                                                                                                                                                                                                                                                                                                                                                                                                                                                                                                                                                                                                  |
| Article Type:                 | Protocol                                                                                                                                                                                                                                                                                                                                                                                                                                                                                                                                                                                                                                                                                                                             |
| Date Submitted by the Author: | 24-Jan-2020                                                                                                                                                                                                                                                                                                                                                                                                                                                                                                                                                                                                                                                                                                                          |
| Complete List of Authors:     | Hayakawa, Mineji; Hokkaido Daigaku Byoin, Department of Emergency Medicine<br>Tagami, Takashi; University of Tokyo<br>Iijima, Hiroaki; Amgen Astellas BioPharma K.K.<br>Kudo, Daisuke; Tohoku University Hospital, Emergency and Critical Care Medicine<br>Sekine, Kazuhiko<br>Ogura, Takayuki; Imperial Foundation SAISEIKAI, Utsunomiya Hospital, Tochigi, JAPAN, Emergency Medicine & Critical Care Medicine<br>Yumoto, Tetsuya; Emergency and Critical Care Medicine<br>Kondo, Yutaka; Ryukyu Daigaku,<br>Endo, Akira<br>Ito, Kaori<br>Matsumura, Yosuke; Chiba University Graduate School of Medicine, Department of Emergency and Critical Care Medicine<br>Kushimoto, Shigeki; Tohoku University Graduate School of Medicine, |
| Keywords:                     | ACCIDENT & EMERGENCY MEDICINE, HAEMATOLOGY, Blood bank & transfusion medicine < HAEMATOLOGY, TRAUMA MANAGEMENT                                                                                                                                                                                                                                                                                                                                                                                                                                                                                                                                                                                                                       |
|                               |                                                                                                                                                                                                                                                                                                                                                                                                                                                                                                                                                                                                                                                                                                                                      |

SCHOLARONE™  
Manuscripts

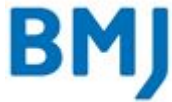

I, the Submitting Author has the right to grant and does grant on behalf of all authors of the Work (as defined in the below author licence), an exclusive licence and/or a non-exclusive licence for contributions from authors who are: i) UK Crown employees; ii) where BMJ has agreed a CC-BY licence shall apply, and/or iii) in accordance with the terms applicable for US Federal Government officers or employees acting as part of their official duties; on a worldwide, perpetual, irrevocable, royalty-free basis to BMJ Publishing Group Ltd ("BMJ") its licensees and where the relevant Journal is co-owned by BMJ to the co-owners of the Journal, to publish the Work in this journal and any other BMJ products and to exploit all rights, as set out in our [licence](#).

The Submitting Author accepts and understands that any supply made under these terms is made by BMJ to the Submitting Author unless you are acting as an employee on behalf of your employer or a postgraduate student of an affiliated institution which is paying any applicable article publishing charge ("APC") for Open Access articles. Where the Submitting Author wishes to make the Work available on an Open Access basis (and intends to pay the relevant APC), the terms of reuse of such Open Access shall be governed by a Creative Commons licence – details of these licences and which [Creative Commons](#) licence will apply to this Work are set out in our licence referred to above.

Other than as permitted in any relevant BMJ Author's Self Archiving Policies, I confirm this Work has not been accepted for publication elsewhere, is not being considered for publication elsewhere and does not duplicate material already published. I confirm all authors consent to publication of this Work and authorise the granting of this licence.

1  
2  
3  
4 Restrictive transfusion strategy for critically injured patients (RESTRIC) trial: A study protocol for a  
5  
6  
7 cluster-randomised, crossover non-inferiority trial  
8  
9

10  
11  
12  
13 Mineji Hayakawa,<sup>1</sup> Takashi Tagami,<sup>2,3</sup> Hiroaki Iijima,<sup>4</sup> Daisuke Kudo,<sup>5</sup> Kazuhiko Sekine,<sup>6</sup> Takayuki Ogura,<sup>7</sup>  
14  
15  
16 Tetsuya Yumoto,<sup>8</sup> Yutaka Kondo,<sup>9</sup> Akira Endo,<sup>10</sup> Kaori Ito,<sup>11</sup> Yosuke Matsumura,<sup>12</sup> Shigeki Kushimoto<sup>5</sup>  
17  
18  
19

20  
21  
22 <sup>1</sup> Department of Emergency Medicine, Hokkaido University Hospital  
23

24  
25 <sup>2</sup> Department of Emergency and Critical Care Medicine, Nippon Medical School Musashi Kosugi Hospital  
26

27  
28 <sup>3</sup> Department of Clinical Epidemiology and Health Economics, School of Public Health, The University of  
29  
30  
31 Tokyo  
32

33  
34 <sup>4</sup> Amgen Astellas BioPharma K.K.  
35

36  
37 <sup>5</sup> Division of Emergency and Critical Care Medicine, Tohoku University Graduate School of Medicine  
38

39  
40 <sup>6</sup> Department of Emergency and Critical Care Medicine, Tokyo Saiseikai Central Hospital  
41

42  
43 <sup>7</sup> Department of Emergency and Critical Care Medicine, Japan Red Cross Maebashi Hospital  
44

45  
46 <sup>8</sup> Department of Emergency, Critical Care, and Disaster Medicine, Okayama University Graduate School of  
47  
48  
49 Medicine, Dentistry and Pharmaceutical Sciences  
50

51  
52 <sup>9</sup> Department of Emergency and Critical Care Medicine, Juntendo University Urayasu Hospital  
53

54  
55 <sup>10</sup> Trauma and Acute Critical Care Centre, Tokyo Medical and Dental University Hospital of Medicine  
56

57  
58 <sup>11</sup> Department of Emergency Medicine, Division of Acute Care Surgery, Teikyo University School of  
59  
60

1  
2  
3  
4 Medicine  
5  
6

7 <sup>12</sup> Department of Emergency and Critical Care Medicine, Chiba University Graduate School of Medicine  
8  
9  
10  
11  
12

### 13 **Correspondence**

14  
15

16 Mineji Hayakwa, MD, PhD  
17

18  
19 Department of Emergency Medicine, Hokkaido University Hospital  
20  
21

22 N14W5 Kita-ku, Sapporo 060-8648, Japan  
23  
24

25 Phone: +81-11-706-7377  
26  
27

28 Fax: +81-11-706-7378  
29  
30

31 E-mail: [mineji@dream.com](mailto:mineji@dream.com)  
32  
33  
34  
35  
36

37 Word count: 2374  
38  
39  
40  
41  
42  
43  
44  
45  
46  
47  
48  
49  
50  
51  
52  
53  
54  
55  
56  
57  
58  
59  
60

## ABSTRACT

**Introduction:** Resuscitation using blood products is critical during the acute post-injury period. However, the optimal target haemoglobin (Hb) levels have not been adequately investigated. With the Restrictive Transfusion Strategy for Critically Injured Patients (RESTRIC) trial, we aim to compare the restrictive and liberal red blood cell (RBC) transfusion strategies.

**Methods and analysis:** This is a cluster-randomised, crossover, non-inferiority trial of patients with severe trauma at 22 hospitals that have been randomised in a 1:1 ratio based on the use of a restrictive or liberal transfusion strategy with target Hb levels of 7–9 or 10–12 g/dL, respectively, during the first year. Subsequently, after a month washout period, another transfusion strategy will be applied for an additional year. RBC transfusion requirements are usually unclear on arrival at the emergency department. Therefore, patients with severe bleeding, which could lead to haemorrhagic shock, will be included in the trial based on the attending physician's judgement. Each RBC transfusion strategy will be applied until 7 days post-admission to the hospital or discharge from the intensive care unit. The outcomes measured will include 28-day survival rate after arrival at the emergency department (primary), the cumulative amount of blood transfused, event-free days, frequency of transfusion-associated lung injury and organ failure and the Glasgow outcome scale score at discharge (secondary). Demonstration of the non-inferiority of restrictive transfusion will emphasise its clinical advantages. We believe the RESTRIC trial will be the first to clarify the optimal target Hb levels in patients with severe trauma during the acute post-injury period.

1  
2  
3  
4 **Ethics and dissemination:** The trial will be performed according to Japanese and international ethical  
5  
6  
7 guidelines. It has been approved by the Ethics Committee of each participating hospital and the Japanese  
8  
9  
10 Association for the Surgery of Trauma. Written informed consent will be obtained from all patients or their  
11  
12  
13 representatives.

14  
15  
16 **Registration details:** UMIN Clinical Trials Registry; UMIN000034405. Registered 8 October 2018.

17  
18  
19 [https://upload.umin.ac.jp/cgi-open-bin/ctr\\_e/ctr\\_view.cgi?recptno=R000038522](https://upload.umin.ac.jp/cgi-open-bin/ctr_e/ctr_view.cgi?recptno=R000038522)  
20  
21  
22

23  
24  
25 **Keywords:** emergency department, massive bleeding, restrictive transfusion strategy, RESTRIC trial,  
26  
27  
28 transfusion-associated lung injury, trauma  
29  
30  
31

### 32 33 34 **STRENGTHS AND LIMITATIONS OF THIS STUDY**

- 35  
36  
37 • While the transfusion of fresh frozen plasma has been widely evaluated in the management of  
38  
39  
40 trauma-associated coagulopathy during the acute post-injury period, the transfusion of red blood cells has  
41  
42  
43 not been adequately investigated.
- 44  
45  
46 • This trial will be the first to determine the optimal haemoglobin level during the acute post-injury period  
47  
48  
49 in patients with severe trauma.
- 50  
51  
52 • This multicentre trial will have a cluster-randomised, crossover non-inferiority design.
- 53  
54  
55 • The two study interventions will be restricted or liberal red blood cell transfusion, initiated immediately  
56  
57  
58 after the patient's arrival at the emergency department.  
59  
60

- 1  
2  
3  
4 • Each red blood cell transfusion strategy will be defined by a target haemoglobin level, rather than by the  
5  
6  
7 patient's haemoglobin level because, among patients with severe trauma and active bleeding, red blood  
8  
9  
10 cell transfusion is frequently initiated before determining the patient's haemoglobin level.  
11  
12  
13  
14  
15  
16  
17  
18  
19  
20  
21  
22  
23  
24  
25  
26  
27  
28  
29  
30  
31  
32  
33  
34  
35  
36  
37  
38  
39  
40  
41  
42  
43  
44  
45  
46  
47  
48  
49  
50  
51  
52  
53  
54  
55  
56  
57  
58  
59  
60
- Each red blood cell transfusion strategy will be defined by a target haemoglobin level, rather than by the patient's haemoglobin level because, among patients with severe trauma and active bleeding, red blood cell transfusion is frequently initiated before determining the patient's haemoglobin level.

For peer review only



## INTRODUCTION

Bleeding is a major cause of death after severe trauma. Although early haemostatic procedures are most important, resuscitation using crystalloid and blood products also plays a crucial role in the early phase of management of patients with severe trauma. While the transfusion of fresh frozen plasma has been widely evaluated in the management of trauma-associated coagulopathy during the acute post-injury period,<sup>1-7</sup> the transfusion of red blood cells (RBCs) has not been investigated adequately, and the optimal target levels of haemoglobin (Hb) in the early phase of treatment remain unclear.

The European guidelines for the management of major bleeding and coagulopathy recommend target Hb levels of 7–9 g/dL.<sup>8</sup> This is based mainly on the results of a post-hoc analysis of the Transfusion Requirements in Critical Care (TRICC) trial,<sup>9</sup> which compared a restrictive transfusion strategy (target Hb level: 7–9 g/dL) with a liberal transfusion strategy (target Hb level: 10–12 g/dL).<sup>10</sup> However, as the TRICC trial included critically ill patients after admission to intensive care units (ICUs), information regarding the patient characteristics, haemostatic procedures and transfusion before admission to the ICUs remains unclear.<sup>10</sup> Furthermore, the trial excluded patients with active blood loss.<sup>10</sup> Therefore, it is not appropriate to apply the results of this trial and its post-hoc analysis to patients in the early phase of severe trauma.<sup>9 10</sup> The European guidelines also state that ‘It should be emphasised that this study was neither designed nor powered to answer these questions with precision’ in the rationale section.<sup>8</sup>

A low Hb level is a possible cause of hypoxic damage to various organs. In patients with traumatic brain injury, a low Hb level is associated with particularly concerning neurological outcomes.<sup>11</sup> Recently, a randomised controlled trial that compared two Hb transfusion thresholds (7.0 or 10.0 g/dL) in patients with

1  
2  
3  
4 traumatic brain injury indicated no differences in the neurological outcomes and mortality rates between the  
5  
6  
7 use of low and high Hb transfusion thresholds.<sup>12</sup> However, 38% of the patients included in that study were not  
8  
9  
10 transfused with any packed RBCs.<sup>12</sup>

11  
12  
13 To address the above-mentioned lack of clarity regarding the clinical impacts of a restrictive RBC  
14  
15  
16 transfusion strategy in trauma patients during the acute post-injury period, we are conducting a  
17  
18  
19 cluster-randomised, crossover non-inferiority trial to compare restrictive and liberal RBC transfusion  
20  
21  
22 strategies.

## 23 24 25 26 27 28 **METHODS AND ANALYSIS**

### 29 30 31 **Trial design**

32  
33  
34 The Restrictive Transfusion strategy for Critically Injured Patients (RESTRIC) trial is a  
35  
36  
37 cluster-randomised, crossover non-inferiority multicentre trial of patients with severe trauma. This pragmatic  
38  
39  
40 trial aims to reproduce real-world settings as closely as possible. The RESTRIC trial applies a  
41  
42  
43 cluster-randomised design that enables the initiation of study interventions immediately after arrival at the  
44  
45  
46 emergency department (ED), and a crossover design to reduce the confounding effects between different  
47  
48  
49 hospitals.

50  
51  
52 Twenty-two hospitals in Japan are participating in the RESTRIC trial (Table 1). These hospitals are  
53  
54  
55 tertiary emergency medical facilities that provide emergency and intensive care treatments to patients with  
56  
57  
58 severe trauma. The participating hospitals have been randomised into two study schedules at a 1:1 ratio based  
59  
60

1  
2  
3  
4 on a pre-created random assignment table to either a restrictive transfusion strategy (target Hb level: 7–9  
5  
6  
7 g/dL) or a liberal transfusion strategy (target Hb level: 10–12 g/dL). After the randomisation, the hospitals  
8  
9  
10 will apply the first transfusion strategy for 1 year (first study period). After a washout period of 1 month after  
11  
12  
13 the end of the first study period, the second transfusion strategy will be applied for another 1 year (second  
14  
15  
16 study period; Figure 1).

## 22 **Patients**

23  
24  
25 Upon arrival at the ED, the requirement for RBC transfusion is usually unclear. Therefore, the  
26  
27  
28 inclusion criteria include trauma patients aged  $\geq 20$  years with one of the following complications based on the  
29  
30  
31 judgment of the attending physician (Figure 2):  
32

- 33  
34 1. Severe bleeding that can result in circulatory shock,
- 35  
36  
37 2. Suspicion of such bleeding after arrival at the ED and
- 38  
39  
40 3. Possibility of inducing such bleeding by surgical procedures during the acute phase of  
41  
42  
43 trauma.

44  
45  
46 The following exclusion criteria have been set:  
47

- 48  
49 1) Cardiac arrest before or upon arrival at the hospital,
- 50  
51  
52 2) Transfer from another hospital,
- 53  
54  
55 3) Physician's decision to withdraw active treatment at the initial assessment,
- 56  
57  
58 4) Severe burn injuries ( $\geq 15\%$  of the body surface),  
59  
60

- 1
- 2
- 3
- 4 5) Pregnancy,
- 5
- 6
- 7 6) Chronic anaemia (Hb level  $\leq 7$  g/dL) and
- 8
- 9
- 10 7) Known objection to blood transfusions.
- 11
- 12
- 13
- 14
- 15

## 16 **Intervention**

17  
18  
19 In severe trauma patients with active bleeding, RBC transfusion is frequently initiated before  
20  
21 confirming a decrease in Hb levels. Therefore, each RBC transfusion strategy is defined by the target Hb  
22  
23 level, rather than the current Hb level. The timing of RBC transfusion initiation in a patient with active  
24  
25 bleeding is determined by the attending physician based on not only the Hb levels, but also on hemodynamic  
26  
27 instability. Either of the RBC transfusion strategies will be applied to patients until (1) 7 days after admission  
28  
29 to the hospital, (2) discharge from the ICU, (3) decision to withdraw active treatment or (4) death.  
30  
31  
32  
33  
34  
35  
36  
37  
38  
39

## 40 **Assessments and follow-up**

41  
42  
43 Clinical assessments and treatments will be performed as necessary, based on the attending  
44  
45 physician's judgement. The schedule of trial assessments is presented in Table 2. The assessment data will be  
46  
47 recorded in the electronic trial data capture system (NorthNet, <https://www.crmic-huhp.jp/northnet/edc/>).  
48  
49 Patients will be followed for 28 days. If a patient is discharged from the hospital prior to 28 days after arrival  
50  
51 at the ED, the investigators will contact the patient (or their representative, as appropriate) by telephone to  
52  
53 collect information regarding the patient's status.  
54  
55  
56  
57  
58  
59  
60

## **Safety monitoring**

A safety monitoring board comprising two independent experts who are not involved in the conduct of the trial will oversee the safety of the trial. Significant adverse events (SAEs) will be recorded immediately in the patient's medical record and in the electronic data capture system. The treating physician will immediately report any SAEs to the site investigator, who will in turn report them to the chief of each site and the principal investigator. The principal investigator will then consult with the safety monitoring board about the SAEs. The board will review and examine the report and send written recommendations made in response to the principal investigator.

## **Primary outcome**

To evaluate the non-inferiority of the restrictive transfusion strategy to the liberal transfusion strategy, we will assess the 28-day survival rate after arrival at the ED (Tables 2 and 3) as the primary outcome measure. Patients with incomplete information regarding survival/death on the 28th day after arrival at the ED will be defined as drop-out and will be excluded from the primary outcome analysis.

## **Secondary outcomes**

The secondary outcome measures will be: (1) the time to death during the first 28 days; (2) in-hospital survival rate; (3) cumulative amounts of RBC concentrate, fresh-frozen plasma and platelet cell

1  
2  
3  
4 concentrate transfused during days 1, 7 and 28; (4) ventilator-, catecholamine- and ICU-free days during the  
5  
6  
7 first 28 days; (5) frequency of organ failure (renal, hepatic and respiratory) during the first 7 days; (6) rates of  
8  
9  
10 each complication (deep venous thrombosis, pulmonary embolism, cerebral infarction, myocardial infarction,  
11  
12  
13 bowel ischemia, transfusion-associated lung injury [TRALI] and sepsis) during the first 28 days and (7) the  
14  
15  
16 Glasgow outcome scale at discharge from the hospital (Tables 2 and 3).<sup>13</sup> If the patient dies during the first 28  
17  
18  
19 days after admission to the hospital, each event-free day will be defined as zero. Renal failure is defined as  
20  
21  
22 stage III as per the Kidney Disease Improving Global Guidelines.<sup>14</sup> Hepatic failure is defined as a total  
23  
24  
25 bilirubin level  $\geq 6$  mg/dL, as per the Sequential Organ Failure Assessment score.<sup>15</sup> Respiratory failure is  
26  
27  
28 defined as moderate acute respiratory distress syndrome as per the Berlin definition.<sup>16</sup> Deep venous  
29  
30  
31 thrombosis, pulmonary embolism and cerebral infarction will be diagnosed via clinical imaging, whereas  
32  
33  
34 myocardial infarction and bowel ischemia will not be diagnosed solely from the elevation of cardiac  
35  
36  
37 biomarkers and laboratory data, respectively. TRALI is defined according to the Toronto definition,<sup>17</sup> and  
38  
39  
40 sepsis is defined according to Sepsis-3.<sup>18</sup>  
41  
42  
43  
44  
45

## 46 **Sample size**

47  
48  
49 In our previous retrospective multicentre observational study, wherein data were collected from 796  
50  
51  
52 patients with severe trauma from 15 hospitals during a 1-year period,<sup>19-26</sup> 241 patients received RBC  
53  
54  
55 concentrates during the first 24 hours after arrival at the ED, and 25% of the patients transfused with RBC  
56  
57  
58 concentrates died within 28 days after arrival at the ED. Based on these results, we assumed a mortality rate of  
59  
60

1  
2  
3  
4 25% at 28 days after arrival in the ED among patients receiving a liberal RBC transfusion strategy. To  
5  
6  
7 evaluate the non-inferiority of the restrictive versus liberal transfusion strategy at 28 days post-arrival at the  
8  
9  
10 ED, we set both the inter-class and inter-period correlation coefficients at 0.05 and the non-inferiority margin  
11  
12  
13 at 3%. Assuming that 17 hospitals participate and are randomised as a cluster, the present study would require  
14  
15  
16 the inclusion of 170 patients into each of the transfusion strategies to reach a power of 80% and a one-sided  
17  
18  
19 alpha level of 2.5%, based on a previous study.<sup>27</sup> Therefore, we set the total target sample size for this study at  
20  
21  
22 400 patients, considering a possible variation in the cluster size, the inclusion of non-appropriate patients and  
23  
24  
25 drop-outs during follow-up. According to previous studies, this number of patients will allow us to study the  
26  
27  
28 outcomes for 2 years.<sup>19-26</sup>

### 34 **Statistical plan**

35  
36  
37 All analyses of the primary outcome will be adjusted for clustering within sites. The analysis will  
38  
39  
40 use a mixed model with adjustment for intervention, the period as a fixed effect and the sites and the  
41  
42  
43 interaction of site with period as a random effect.<sup>28</sup> The non-inferiority margin will be set at  $P_0 - P_1 < 0.03$  ( $P_0$ ,  
44  
45  
46 28-day survival rate for liberal transfusion;  $P_1$ , 28-day survival rate for restrictive transfusion). We will use the  
47  
48  
49 full analysis set for our primary outcome analysis after excluding cases with missing primary outcome values.  
50  
51  
52 We will follow the principle of intention-to-treat for the primary analysis and a per-protocol for sensitivity  
53  
54  
55 analysis to ensure that no cases deviate intentionally from the target Hb levels.  
56  
57  
58  
59  
60

1  
2  
3  
4 The secondary outcomes will be analysed as follows. (1) Kaplan–Meier curves with log rank  
5  
6  
7 statistics will be used to assess the survival rate during the first 28 days after arrival at the ED. (2) The number  
8  
9  
10 of in-hospital survival patients will be tabulated. (3) Summary statistics of the cumulative amounts of  
11  
12  
13 transfused RBC concentrate, fresh frozen plasma and platelet cell concentrate during days 1, 7 and 28 after  
14  
15  
16 arrival at the ED will be created using graphs plotted over time. (4) Summary statistics of the event-free days  
17  
18  
19 (i.e., ventilator-, catecholamine- and ICU- free days) will be calculated. (5) The proportions of organ failure  
20  
21  
22 and complications will be calculated. (6) The Glasgow outcome scale will be measured at discharge from  
23  
24  
25 hospital.

26  
27  
28 Subgroup analyses will be performed to investigate the effects of the interventions on patients  
29  
30  
31 according to sex, age (<60 or ≥60 years), Injury Severity Score (<16 or ≥16 years), head trauma and  
32  
33  
34 performance of definitive surgical procedures within 6 hours of arrival at the ED. The results of both  
35  
36  
37 unadjusted and covariate data-adjusted analyses will be assessed. Furthermore, we will perform a post-hoc  
38  
39  
40 power analysis if the numbers of the participating institutions and included patients differ from the planned  
41  
42  
43 numbers.

## 44 45 46 47 48 **ETHICS AND DISSEMINATION**

### 49 50 51 **Ethical approval and consent to participate**

52  
53  
54 The clinical trial will be conducted according to the principles of the Declaration of Helsinki and  
55  
56  
57 Ethical Guidelines for Medical and Health Research Involving Human Subjects published by the Ministry of  
58  
59  
60



1  
2  
3  
4 Health, Labour and Welfare of Japan and the Japanese Ministry of Education, Culture, Sports, Science and  
5  
6  
7 Technology. Patients or the public were not involved in the design, or conduct, or reporting, or dissemination  
8  
9  
10 plans of our trial. The present trial is registered with the UMIN Clinical Trials Registry (identifier:  
11  
12  
13 UMIN000034405) and has been approved by the Ethics Committee of each participating hospital and the  
14  
15  
16 Japanese Association for the Surgery of Trauma. Written informed consent will be obtained from all patients  
17  
18  
19 or their representatives.  
20  
21  
22  
23  
24

### 25 **Expected Outcomes**

26  
27  
28 The RESTRIC trial will compare the outcomes of the restrictive versus liberal RBC transfusion  
29  
30  
31 strategy in trauma patients during the acute post-injury period. To the best of our knowledge, the RESTRIC  
32  
33  
34 trial will be the first to clarify the optimal target Hb levels in patients with severe trauma during this period.  
35  
36

37 Although previous studies, such as the TRICC trial and its post-hoc analysis,<sup>9 10</sup> initiated the study  
38  
39  
40 interventions after admission to the ICU, the RESTRIC trial has been designed to initiate the study  
41  
42  
43 interventions immediately after arrival at ED and to continue these interventions through the early phase of  
44  
45  
46 severe trauma. In patients with severe trauma, management before admission to an ICU is as important as that  
47  
48  
49 after admission to an ICU. If the restrictive RBC transfusion strategy is found to be non-inferior to the liberal  
50  
51  
52 RBC transfusion strategy, the former will be considered advantageous in clinical settings during the acute  
53  
54  
55 postinjury period because will help to reduce the total amount of RBC transfusion. This reduction in RBC  
56  
57  
58  
59  
60

1  
2  
3  
4 transfusion will reduce (a) the risk of transfusion-related complications such as TRALI, (b) RBC  
5  
6  
7 transfusion-related immunomodulation and (c) the costs associated with RBC transfusion.<sup>17 29</sup>  
8  
9  
10  
11  
12

### 13 **Trial status**

14  
15  
16 At first, the trial protocol ver. 1.3 was approved at 11th October 2018. The latest protocol is ver. 1.7  
17  
18  
19 which have been approved at 19th December 2019 after minor changes. In May 2019, 12 participating  
20  
21  
22 institutions were randomised as a cluster, and the trial was started. The first patient was included on May 11,  
23  
24  
25 2019. Subsequently, 10 more institutions have joined the trial and have been randomised. The last  
26  
27  
28 participating institution began the trial in October 2019. Patients will be recruited until October 2021 and  
29  
30  
31 followed-up thereafter.  
32  
33  
34  
35  
36

### 37 **Authors' contributions**

38  
39  
40 MH conceived and designed the RESTRIC trial and drafted the manuscript. TT drafted the statistical plan. HI  
41  
42  
43 calculated the sample size and developed the statistical plan. SK is the principal investigator and supervised  
44  
45  
46 the planning of the RESTRIC trial. All authors discussed the plan of the RESTRIC trial, revised the  
47  
48  
49 manuscript for important intellectual content and read and approved the final manuscript.  
50  
51  
52  
53  
54

### 55 **Funding**

56  
57  
58 This study was supported in part by research grants from The General Insurance Association of Japan and The  
59  
60

1  
2  
3  
4 Marumo Emergency Medical Research Promotion Fund.  
5  
6  
7  
8  
9

## 10 **Competing Interests**

11  
12  
13 The authors declare that they have no competing interests.  
14  
15  
16  
17  
18

## 19 **Acknowledgements**

20  
21  
22 We would like to thank Akiyoshi Hagiwara (Department of Emergency Medicine and Critical Care, National  
23  
24  
25 Centre for Global Health and Medicine), Atsushi Shiraishi (Emergency and Trauma Centre, Kameda Medical  
26  
27  
28 Centre), Daizoh Saitoh (Division of Traumatology Research Institute, National Defence Medical College),  
29  
30  
31 Kazuhisa Yoshiya (Department of Traumatology and Acute Critical Medicine, Osaka University Graduate  
32  
33  
34 School of Medicine) and Shinji Nakahara (Department of Emergency Medicine, Teikyo University School of  
35  
36  
37 Medicine) for supporting the RESTRIC trial. We would also like to thank Editage (<https://online.editage.jp/>)  
38  
39  
40 for English language editing.  
41  
42  
43  
44  
45

## 46 **References**

- 47  
48  
49 1. Borgman MA, Spinella PC, Perkins JG, *et al.* The ratio of blood products transfused affects mortality  
50 in patients receiving massive transfusions at a combat support hospital. *The Journal of trauma*  
51 2007;63:805-13.  
52  
53 2. Shaz BH, Dente CJ, Nicholas J, *et al.* Increased number of coagulation products in relationship to red  
54 blood cell products transfused improves mortality in trauma patients. *Transfusion* 2010;50:493-500.  
55  
56 3. Cotton BA, Reddy N, Hatch QM, *et al.* Damage control resuscitation is associated with a reduction in  
57 resuscitation volumes and improvement in survival in 390 damage control laparotomy patients.  
58 *Annals of surgery* 2011;254:598-605.  
59  
60

4. Holcomb JB, del Junco DJ, Fox EE, *et al.* The prospective, observational, multicenter, major trauma transfusion (PROMMTT) study: comparative effectiveness of a time-varying treatment with competing risks. *JAMA Surg* 2013;148:127-36.
5. Johansson PI, Sorensen AM, Larsen CF, *et al.* Low hemorrhage-related mortality in trauma patients in a Level I trauma center employing transfusion packages and early thromboelastography-directed hemostatic resuscitation with plasma and platelets. *Transfusion* 2013;53:3088-99.
6. Langan NR, Eckert M, Martin MJ. Changing patterns of in-hospital deaths following implementation of damage control resuscitation practices in US forward military treatment facilities. *JAMA Surg* 2014;149:904-12.
7. Holcomb JB, Tilley BC, Baraniuk S, *et al.* Transfusion of plasma, platelets, and red blood cells in a 1:1:1 vs a 1:1:2 ratio and mortality in patients with severe trauma: the PROPPR randomized clinical trial. *Jama* 2015;313:471-82.
8. Rossaint R, Bouillon B, Cerny V, *et al.* The European guideline on management of major bleeding and coagulopathy following trauma: fourth edition. *Critical care* 2016;20:100.
9. McIntyre L, Hebert PC, Wells G, *et al.* Is a restrictive transfusion strategy safe for resuscitated and critically ill trauma patients? *The Journal of trauma* 2004;57:563-8; discussion 68.
10. Hebert PC, Wells G, Blajchman MA, *et al.* A multicenter, randomized, controlled clinical trial of transfusion requirements in critical care. Transfusion Requirements in Critical Care Investigators, Canadian Critical Care Trials Group. *The New England journal of medicine* 1999;340:409-17.
11. Sena MJ, Rivers RM, Muizelaar JP, *et al.* Transfusion practices for acute traumatic brain injury: a survey of physicians at US trauma centers. *Intensive care medicine* 2009;35:480-8.
12. Robertson CS, Hannay HJ, Yamal JM, *et al.* Effect of erythropoietin and transfusion threshold on neurological recovery after traumatic brain injury: a randomized clinical trial. *Jama* 2014;312:36-47.
13. Jennett B, Bond M. Assessment of outcome after severe brain damage. *Lancet* 1975;1:480-4.
14. Khwaja A. KDIGO clinical practice guidelines for acute kidney injury. *Nephron Clinical practice* 2012;120:c179-84.
15. Vincent JL, de Mendonca A, Cantraine F, *et al.* Use of the SOFA score to assess the incidence of organ dysfunction/failure in intensive care units: results of a multicenter, prospective study. Working group on "sepsis-related problems" of the European Society of Intensive Care Medicine. *Critical care medicine* 1998;26:1793-800.
16. Force ADT, Ranieri VM, Rubenfeld GD, *et al.* Acute respiratory distress syndrome: the Berlin Definition. *Jama* 2012;307:2526-33.
17. Kleinman S, Caulfield T, Chan P, *et al.* Toward an understanding of transfusion-related acute lung injury: statement of a consensus panel. *Transfusion* 2004;44:1774-89.
18. Shankar-Hari M, Phillips GS, Levy ML, *et al.* Developing a New Definition and Assessing New Clinical Criteria for Septic Shock: For the Third International Consensus Definitions for Sepsis and Septic Shock (Sepsis-3). *Jama* 2016;315:775-87.
19. Shiraishi A, Kushimoto S, Otomo Y, *et al.* Effectiveness of early administration of tranexamic acid in

- 1  
2  
3 patients with severe trauma. *The British journal of surgery* 2017;104:710-17.
- 4  
5 20. Nakamura Y, Ishikura H, Kushimoto S, *et al.* Fibrinogen level on admission is a predictor for massive  
6 transfusion in patients with severe blunt trauma: Analyses of a retrospective multicentre observational  
7 study. *Injury* 2017;48:674-79.
- 8  
9 21. Kudo D, Kushimoto S, Shiraishi A, *et al.* The impact of preinjury antithrombotic medication on  
10 hemostatic interventions in trauma patients. *The American journal of emergency medicine*  
11 2017;35:62-65.
- 12  
13 22. Hayakawa M, Maekawa K, Kushimoto S, *et al.* Hyperfibrinolysis in severe isolated traumatic brain  
14 injury may occur without tissue hypoperfusion: a retrospective observational multicentre study.  
15 *Critical care* 2017;21:222.
- 16  
17 23. Hayakawa M, Kushimoto S, Watanabe E, *et al.* Pharmacokinetics of recombinant human soluble  
18 thrombomodulin in disseminated intravascular coagulation patients with acute renal dysfunction.  
19 *Thrombosis and haemostasis* 2017;117:851-59.
- 20  
21 24. Hayakawa M, Maekawa K, Kushimoto S, *et al.* High D-Dimer Levels Predict a Poor Outcome in  
22 Patients with Severe Trauma, Even with High Fibrinogen Levels on Arrival: A Multicenter  
23 Retrospective Study. *Shock* 2016;45:308-14.
- 24  
25 25. Hagiwara A, Kushimoto S, Kato H, *et al.* Can Early Aggressive Administration of Fresh Frozen  
26 Plasma Improve Outcomes in Patients with Severe Blunt Trauma?--A Report by the Japanese  
27 Association for the Surgery of Trauma. *Shock* 2016;45:495-501.
- 28  
29 26. Endo A, Shiraishi A, Otomo Y, *et al.* Development of Novel Criteria of the "Lethal Triad" as an  
30 Indicator of Decision Making in Current Trauma Care: A Retrospective Multicenter Observational  
31 Study in Japan. *Critical care medicine* 2016;44:e797-803.
- 32  
33 27. Giraudeau B, Ravaud P, Donner A. Sample size calculation for cluster randomized cross-over trials.  
34 *Stat Med* 2008;27:5578-85.
- 35  
36 28. Morgan KE, Forbes AB, Keogh RH, *et al.* Choosing appropriate analysis methods for cluster  
37 randomised cross-over trials with a binary outcome. *Stat Med* 2017;36:318-33.
- 38  
39 29. Remy KE, Hall MW, Cholette J, *et al.* Mechanisms of red blood cell transfusion-related  
40 immunomodulation. *Transfusion* 2018;58:804-15.
- 41  
42  
43  
44  
45  
46  
47  
48  
49  
50  
51

## 52 **Figure Legends**

### 53 **Figure 1. Flowchart of the randomisation and crossover of the participating hospitals.**

54  
55  
56  
57  
58 Hb, Haemoglobin  
59  
60

1  
2  
3  
4  
5  
6  
7  
8  
9  
10  
11  
12  
13  
14  
15  
16  
17  
18  
19  
20  
21  
22  
23  
24  
25  
26  
27  
28  
29  
30  
31  
32  
33  
34  
35  
36  
37  
38  
39  
40  
41  
42  
43  
44  
45  
46  
47  
48  
49  
50  
51  
52  
53  
54  
55  
56  
57  
58  
59  
60

**Figure 2. Flowchart of the patient enrolment process.**

For peer review only

Table 1. List of participating hospitals

## Principal institution

Department of Emergency and Critical Care Medicine, Tohoku University Hospital

## Project management

Department of Emergency Medicine, Hokkaido University Hospital

## Other participating institutions

Advanced Critical Care and Emergency Centre, Okayama University Hospital

Advanced Critical Care Centre, Gifu University Hospital

Advanced Emergency and Critical Care Centre, Saitama Red Cross Hospital

Advanced Trauma, Emergency and Critical Care Centre, Oita University Hospital

Department of Emergency Medicine, Gunma University Graduate School of Medicine

Department of Acute Care Surgery, Shimane University Faculty of Medicine

Department of Emergency and Critical Care Medicine, Chiba University Graduate School of Medicine

Department of Emergency and Critical Care Medicine, Fukuoka University Hospital

Department of Emergency and Critical Care Medicine, Japan Red Cross Maebashi Hospital

Department of Emergency and Critical Care Medicine, Juntendo University Urayasu Hospital

Department of Emergency and Critical Care Medicine, Nippon Medical School

Department of Emergency and Critical Care Medicine, Nippon Medical School Tama Nagayama Hospital

Department of Emergency and Critical Care Medicine, Tokyo Saiseikai Central Hospital

Department of Emergency and Critical Care Medicine, Wakayama Medical University

Department of Emergency Medicine, Division of Acute Care Surgery, Teikyo University School of Medicine

Emergency and Critical Care Centre, Kochi Health Sciences Centre

1  
2 Senri Critical Care Medical Centre, Saiseikai Senri Hospital

3  
4 Senshu Trauma and Critical Care Centre, Rinku General Medical Centre

5 Shock and Trauma Centre, Nippon Medical School Chiba Hokusoh Hospital

6  
7 Trauma and Acute Critical Care Centre, Tokyo Medical and Dental University Hospital of Medicine

---

8  
9  
10  
11  
12  
13  
14  
15  
16  
17  
18  
19  
20  
21  
22  
23  
24  
25  
26  
27  
28  
29  
30  
31  
32  
33  
34  
35  
36  
37  
38  
39  
40  
41  
42  
43  
44  
45  
46

For peer review only



Table 2. Schedule of assessments

|                                                        | Arrival at ED | 6 hr | 12 hr | 24 hr | 48 hr | Day 7 | Discharge from ICU | Discharge from hospital | Day 28 |
|--------------------------------------------------------|---------------|------|-------|-------|-------|-------|--------------------|-------------------------|--------|
| Informed consent                                       | ○             |      |       |       |       |       |                    |                         |        |
| Check inclusion/exclusion criteria                     | ○             |      |       |       |       |       |                    |                         |        |
| Patient assesment                                      | ○             |      |       |       |       |       |                    |                         |        |
| Physiologic severity                                   | ○             |      |       |       |       |       |                    |                         |        |
| Abbreviated Injury Scale                               | ○             |      |       |       |       |       |                    |                         |        |
| Surgical intervention and IVR                          | —○—           |      |       |       |       |       |                    |                         |        |
| Laboratory data                                        | ○             |      |       |       |       |       |                    |                         |        |
| Haemoglobin level                                      | —————○—————   |      |       |       |       |       |                    |                         |        |
| Cumulative amount of transfusion                       |               | ○    | ○     | ○     | ○     | ○     |                    |                         | ○      |
| Organ failure (renal/respiratory/hepatic)              | —————○—————   |      |       |       |       |       |                    |                         |        |
| TRALI                                                  | —————○—————   |      |       |       |       |       |                    |                         |        |
| Complications                                          | —————○—————   |      |       |       |       |       |                    |                         |        |
| Mortality                                              |               |      |       |       |       |       | ○                  | ○                       | ○      |
| Discharge destination                                  |               |      |       |       |       |       |                    | ○                       |        |
| Glasgow outcome scale                                  |               |      |       |       |       |       |                    | ○                       |        |
| Event-free days (free of ventilator/catecholamine/ICU) |               |      |       |       |       |       |                    |                         | ○      |

Complications include deep venous thrombosis, pulmonary embolism, acute myocardial infarction, ischaemic bowel necrosis and sepsis.

IVR, interventional radiology; TRALI, transfusion-related acute lung injury; ICU, intensive care unit

Table 3. Primary and secondary outcomes

| Outcome                                                          | Definition/annotation                                                                                                                                                    |
|------------------------------------------------------------------|--------------------------------------------------------------------------------------------------------------------------------------------------------------------------|
| Primary outcome                                                  |                                                                                                                                                                          |
| 28-day survival rate after arrival at the ED                     | Patients whose survival/death information on 28th day after arrival at the ED is unclear are defined as drop-outs and will be excluded from the primary outcome analysis |
| Secondary outcome                                                |                                                                                                                                                                          |
| Time to death during the first 28 days after arrival at the ED   |                                                                                                                                                                          |
| In-hospital survival rate                                        |                                                                                                                                                                          |
| Cumulative transfusion amounts                                   |                                                                                                                                                                          |
| Red blood cell concentrate                                       | Cumulative amounts during the first 1, 7, and 28 days after arrival at the ED                                                                                            |
| Fresh-frozen plasma                                              | Cumulative amounts during the first 1, 7, and 28 days after arrival at the ED                                                                                            |
| Platelet concentrate                                             | Cumulative amounts during the first 1, 7, and 28 days after arrival at the ED                                                                                            |
| Event-free days during the first 28 days after arrival at the ED |                                                                                                                                                                          |
| Ventilator-free days                                             | When the patient dies during the first 28 days after the arrival at ED, the free days are defined as zero.                                                               |
| Catecholamine-free days                                          | When the patient dies during the first 28 days after the arrival at ED, the free days are defined as zero.                                                               |
| ICU-free days                                                    | When the patient dies during the first 28 days after the arrival at ED, the free days are defined as zero.                                                               |
| Organ failure during the first 7-days after arrival at the ED    |                                                                                                                                                                          |

|    |                                                                                    |                                                                                |
|----|------------------------------------------------------------------------------------|--------------------------------------------------------------------------------|
| 1  |                                                                                    |                                                                                |
| 2  | Renal failure                                                                      | Stage III defined by the Kidney Disease Improving Global Guidelines            |
| 3  |                                                                                    |                                                                                |
| 4  |                                                                                    | Total bilirubin level $\geq 6$ mg/dL as per the Sequential Organ Failure       |
| 5  | Hepatic failure                                                                    |                                                                                |
| 6  |                                                                                    | Assessment score                                                               |
| 7  |                                                                                    |                                                                                |
| 8  | Respiratory failure                                                                | Moderate acute respiratory distress syndrome according to the Berlin           |
| 9  |                                                                                    | definition                                                                     |
| 10 |                                                                                    |                                                                                |
| 11 | Complications during in-hospital stay or the first 28 days after arrival at the ED |                                                                                |
| 12 |                                                                                    |                                                                                |
| 13 | Deep venous thrombosis                                                             | Presence or absence should be diagnosed using clinical imaging                 |
| 14 | Pulmonary embolism                                                                 | Presence or absence should be diagnosed using clinical imaging                 |
| 15 |                                                                                    |                                                                                |
| 16 | Cerebral infarction                                                                | Presence or absence should be diagnosed using clinical imaging                 |
| 17 |                                                                                    |                                                                                |
| 18 | Acute myocardial infarction                                                        | Presence or absence should not be diagnosed using only an elevation of cardiac |
| 19 |                                                                                    | biomarkers                                                                     |
| 20 |                                                                                    |                                                                                |
| 21 | Bowel ischaemia                                                                    | Presence or absence should not be diagnosed using laboratory data              |
| 22 |                                                                                    |                                                                                |
| 23 | Transfusion-associated lung injury                                                 | Presence, possibility or absence are defined using the Toronto definition      |
| 24 | Sepsis                                                                             | Presence or absence should be diagnosed using the Sepsis-3 definition          |
| 25 |                                                                                    |                                                                                |
| 26 | Glasgow outcome scale score at discharge from                                      | Good recovery, moderate disability, severe disability, persistent vegetative   |
| 27 | the hospital                                                                       | state or death                                                                 |
| 28 | <hr/>                                                                              |                                                                                |
| 29 |                                                                                    |                                                                                |
| 30 |                                                                                    |                                                                                |
| 31 |                                                                                    |                                                                                |
| 32 |                                                                                    |                                                                                |
| 33 |                                                                                    |                                                                                |
| 34 |                                                                                    |                                                                                |
| 35 |                                                                                    |                                                                                |
| 36 |                                                                                    |                                                                                |
| 37 |                                                                                    |                                                                                |
| 38 |                                                                                    |                                                                                |
| 39 |                                                                                    |                                                                                |
| 40 |                                                                                    |                                                                                |
| 41 |                                                                                    |                                                                                |
| 42 |                                                                                    |                                                                                |
| 43 |                                                                                    |                                                                                |
| 44 |                                                                                    |                                                                                |
| 45 |                                                                                    |                                                                                |
| 46 |                                                                                    |                                                                                |

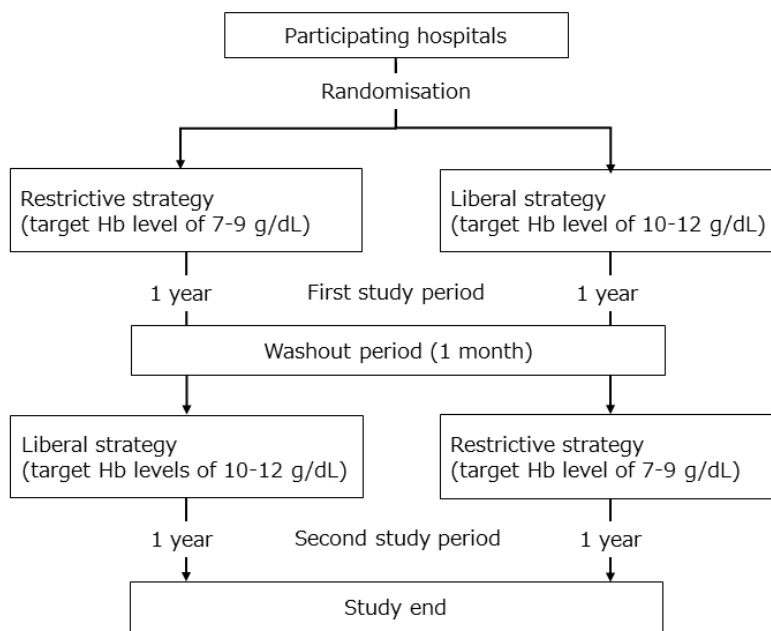

Figure 1

Figure 1. Flowchart of the randomisation and crossover of the participating hospitals.  
Hb, Haemoglobin

190x275mm (96 x 96 DPI)

1  
2  
3  
4  
5  
6  
7  
8  
9  
10  
11  
12  
13  
14  
15  
16  
17  
18  
19  
20  
21  
22  
23  
24  
25  
26  
27  
28  
29  
30  
31  
32  
33  
34  
35  
36  
37  
38  
39  
40  
41  
42  
43  
44  
45  
46  
47  
48  
49  
50  
51  
52  
53  
54  
55  
56  
57  
58  
59  
60

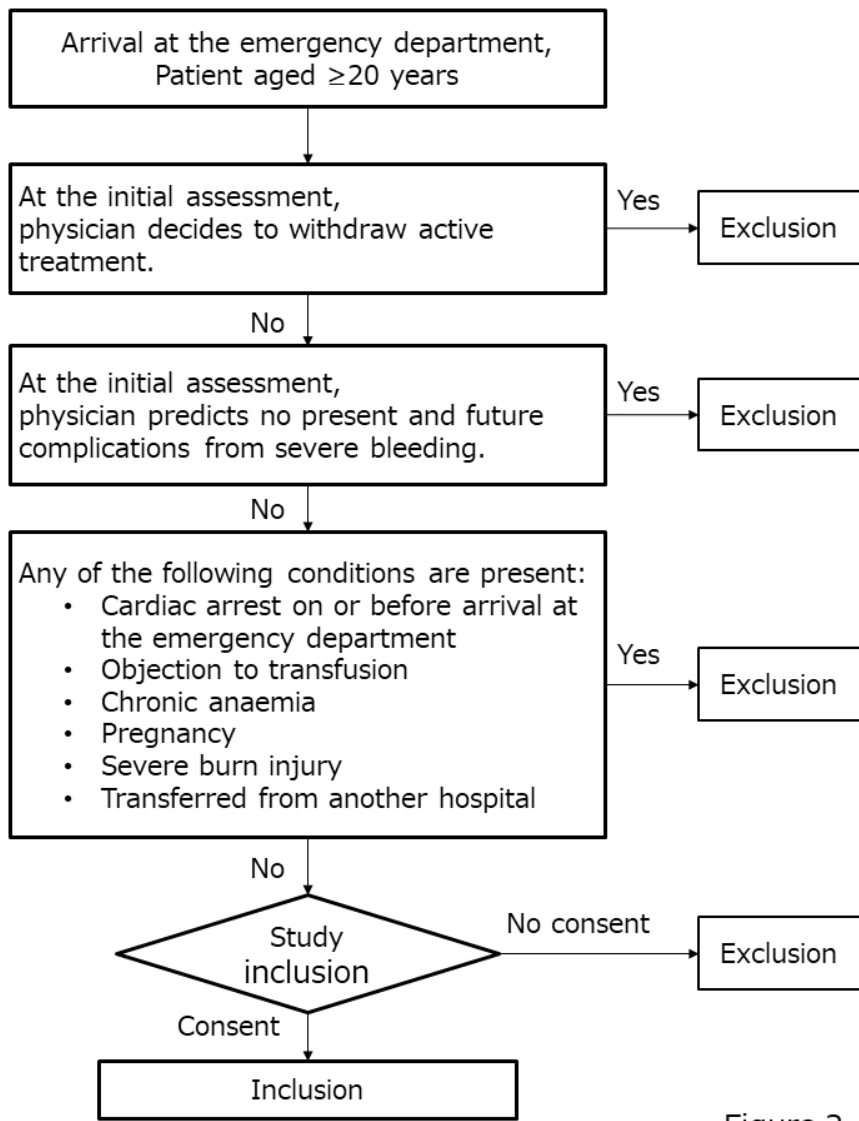

Figure 2

Figure 2. Flowchart of the patient enrolment process.

190x254mm (96 x 96 DPI)

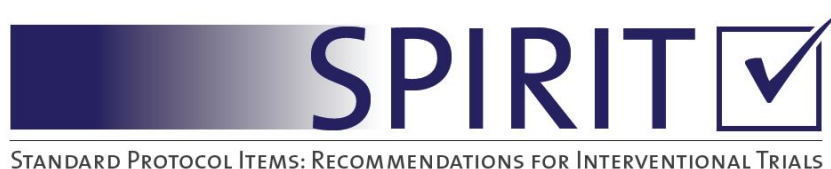

STANDARD PROTOCOL ITEMS: RECOMMENDATIONS FOR INTERVENTIONAL TRIALS

SPIRIT 2013 Checklist: Recommended items to address in a clinical trial protocol and related documents\*

| Section/item                      | Item No | Description                                                                                                                                                                                                                                                                              |        |
|-----------------------------------|---------|------------------------------------------------------------------------------------------------------------------------------------------------------------------------------------------------------------------------------------------------------------------------------------------|--------|
| <b>Administrative information</b> |         |                                                                                                                                                                                                                                                                                          |        |
| Title                             | 1       | Descriptive title identifying the study design, population, interventions, and, if applicable, trial acronym                                                                                                                                                                             | ✓      |
| Trial registration                | 2a      | Trial identifier and registry name. If not yet registered, name of intended registry                                                                                                                                                                                                     | P4     |
|                                   | 2b      | All items from the World Health Organization Trial Registration Data Set                                                                                                                                                                                                                 | ✓      |
| Protocol version                  | 3       | Date and version identifier                                                                                                                                                                                                                                                              | P15    |
| Funding                           | 4       | Sources and types of financial, material, and other support                                                                                                                                                                                                                              | P15    |
| Roles and responsibilities        | 5a      | Names, affiliations, and roles of protocol contributors                                                                                                                                                                                                                                  | P15    |
|                                   | 5b      | Name and contact information for the trial sponsor                                                                                                                                                                                                                                       | N/A    |
|                                   | 5c      | Role of study sponsor and funders, if any, in study design; collection, management, analysis, and interpretation of data; writing of the report; and the decision to submit the report for publication, including whether they will have ultimate authority over any of these activities | N/A    |
|                                   | 5d      | Composition, roles, and responsibilities of the coordinating centre, steering committee, endpoint adjudication committee, data management team, and other individuals or groups overseeing the trial, if applicable (see Item 21a for data monitoring committee)                         | Table1 |
| <b>Introduction</b>               |         |                                                                                                                                                                                                                                                                                          |        |
| Background and rationale          | 6a      | Description of research question and justification for undertaking the trial, including summary of relevant studies (published and unpublished) examining benefits and harms for each intervention                                                                                       | P6     |
|                                   | 6b      | Explanation for choice of comparators                                                                                                                                                                                                                                                    | P6     |
| Objectives                        | 7       | Specific objectives or hypotheses                                                                                                                                                                                                                                                        | P7     |

|    |                      |     |                                                                                                                                                                                                                                                                                                                                                                                |                        |
|----|----------------------|-----|--------------------------------------------------------------------------------------------------------------------------------------------------------------------------------------------------------------------------------------------------------------------------------------------------------------------------------------------------------------------------------|------------------------|
| 1  |                      |     |                                                                                                                                                                                                                                                                                                                                                                                |                        |
| 2  | Trial design         | 8   | Description of trial design including type of trial (eg, parallel group, crossover, factorial, single group), allocation ratio, and framework (eg, superiority, equivalence, noninferiority, exploratory)                                                                                                                                                                      | P7                     |
| 3  |                      |     |                                                                                                                                                                                                                                                                                                                                                                                |                        |
| 4  |                      |     |                                                                                                                                                                                                                                                                                                                                                                                |                        |
| 5  |                      |     |                                                                                                                                                                                                                                                                                                                                                                                |                        |
| 6  |                      |     |                                                                                                                                                                                                                                                                                                                                                                                |                        |
| 7  |                      |     |                                                                                                                                                                                                                                                                                                                                                                                |                        |
| 8  |                      |     | <b>Methods: Participants, interventions, and outcomes</b>                                                                                                                                                                                                                                                                                                                      |                        |
| 9  |                      |     |                                                                                                                                                                                                                                                                                                                                                                                |                        |
| 10 | Study setting        | 9   | Description of study settings (eg, community clinic, academic hospital) and list of countries where data will be collected. Reference to where list of study sites can be obtained                                                                                                                                                                                             | P7                     |
| 11 |                      |     |                                                                                                                                                                                                                                                                                                                                                                                |                        |
| 12 |                      |     |                                                                                                                                                                                                                                                                                                                                                                                |                        |
| 13 |                      |     |                                                                                                                                                                                                                                                                                                                                                                                |                        |
| 14 |                      |     |                                                                                                                                                                                                                                                                                                                                                                                |                        |
| 15 | Eligibility criteria | 10  | Inclusion and exclusion criteria for participants. If applicable, eligibility criteria for study centres and individuals who will perform the interventions (eg, surgeons, psychotherapists)                                                                                                                                                                                   | P8                     |
| 16 |                      |     |                                                                                                                                                                                                                                                                                                                                                                                |                        |
| 17 |                      |     |                                                                                                                                                                                                                                                                                                                                                                                |                        |
| 18 |                      |     |                                                                                                                                                                                                                                                                                                                                                                                |                        |
| 19 |                      |     |                                                                                                                                                                                                                                                                                                                                                                                |                        |
| 20 |                      |     |                                                                                                                                                                                                                                                                                                                                                                                |                        |
| 21 | Interventions        | 11a | Interventions for each group with sufficient detail to allow replication, including how and when they will be administered                                                                                                                                                                                                                                                     | P9                     |
| 22 |                      |     |                                                                                                                                                                                                                                                                                                                                                                                |                        |
| 23 |                      |     |                                                                                                                                                                                                                                                                                                                                                                                |                        |
| 24 |                      |     |                                                                                                                                                                                                                                                                                                                                                                                |                        |
| 25 |                      |     |                                                                                                                                                                                                                                                                                                                                                                                |                        |
| 26 |                      | 11b | Criteria for discontinuing or modifying allocated interventions for a given trial participant (eg, drug dose change in response to harms, participant request, or improving/worsening disease)                                                                                                                                                                                 | N/A                    |
| 27 |                      |     |                                                                                                                                                                                                                                                                                                                                                                                |                        |
| 28 |                      |     |                                                                                                                                                                                                                                                                                                                                                                                |                        |
| 29 |                      |     |                                                                                                                                                                                                                                                                                                                                                                                |                        |
| 30 |                      |     |                                                                                                                                                                                                                                                                                                                                                                                |                        |
| 31 |                      | 11c | Strategies to improve adherence to intervention protocols, and any procedures for monitoring adherence (eg, drug tablet return, laboratory tests)                                                                                                                                                                                                                              | N/A                    |
| 32 |                      |     |                                                                                                                                                                                                                                                                                                                                                                                |                        |
| 33 |                      |     |                                                                                                                                                                                                                                                                                                                                                                                |                        |
| 34 |                      |     |                                                                                                                                                                                                                                                                                                                                                                                |                        |
| 35 |                      |     |                                                                                                                                                                                                                                                                                                                                                                                |                        |
| 36 |                      | 11d | Relevant concomitant care and interventions that are permitted or prohibited during the trial                                                                                                                                                                                                                                                                                  | N/A                    |
| 37 |                      |     |                                                                                                                                                                                                                                                                                                                                                                                |                        |
| 38 |                      |     |                                                                                                                                                                                                                                                                                                                                                                                |                        |
| 39 | Outcomes             | 12  | Primary, secondary, and other outcomes, including the specific measurement variable (eg, systolic blood pressure), analysis metric (eg, change from baseline, final value, time to event), method of aggregation (eg, median, proportion), and time point for each outcome. Explanation of the clinical relevance of chosen efficacy and harm outcomes is strongly recommended | P9<br>Table2<br>Table3 |
| 40 |                      |     |                                                                                                                                                                                                                                                                                                                                                                                |                        |
| 41 |                      |     |                                                                                                                                                                                                                                                                                                                                                                                |                        |
| 42 |                      |     |                                                                                                                                                                                                                                                                                                                                                                                |                        |
| 43 |                      |     |                                                                                                                                                                                                                                                                                                                                                                                |                        |
| 44 |                      |     |                                                                                                                                                                                                                                                                                                                                                                                |                        |
| 45 |                      |     |                                                                                                                                                                                                                                                                                                                                                                                |                        |
| 46 |                      |     |                                                                                                                                                                                                                                                                                                                                                                                |                        |
| 47 |                      |     |                                                                                                                                                                                                                                                                                                                                                                                |                        |
| 48 | Participant timeline | 13  | Time schedule of enrolment, interventions (including any run-ins and washouts), assessments, and visits for participants. A schematic diagram is highly recommended (see Figure)                                                                                                                                                                                               | Figure1<br>Figure2     |
| 49 |                      |     |                                                                                                                                                                                                                                                                                                                                                                                |                        |
| 50 |                      |     |                                                                                                                                                                                                                                                                                                                                                                                |                        |
| 51 |                      |     |                                                                                                                                                                                                                                                                                                                                                                                |                        |
| 52 |                      |     |                                                                                                                                                                                                                                                                                                                                                                                |                        |
| 53 |                      |     |                                                                                                                                                                                                                                                                                                                                                                                |                        |
| 54 | Sample size          | 14  | Estimated number of participants needed to achieve study objectives and how it was determined, including clinical and statistical assumptions supporting any sample size calculations                                                                                                                                                                                          | P11-12                 |
| 55 |                      |     |                                                                                                                                                                                                                                                                                                                                                                                |                        |
| 56 |                      |     |                                                                                                                                                                                                                                                                                                                                                                                |                        |
| 57 |                      |     |                                                                                                                                                                                                                                                                                                                                                                                |                        |
| 58 |                      |     |                                                                                                                                                                                                                                                                                                                                                                                |                        |
| 59 |                      |     |                                                                                                                                                                                                                                                                                                                                                                                |                        |
| 60 |                      |     |                                                                                                                                                                                                                                                                                                                                                                                |                        |

|    |                                                                     |     |                                                                                                                                                                                                                                                                                                                                                                                                              |      |
|----|---------------------------------------------------------------------|-----|--------------------------------------------------------------------------------------------------------------------------------------------------------------------------------------------------------------------------------------------------------------------------------------------------------------------------------------------------------------------------------------------------------------|------|
| 1  |                                                                     |     |                                                                                                                                                                                                                                                                                                                                                                                                              |      |
| 2  | Recruitment                                                         | 15  | Strategies for achieving adequate participant enrolment to reach target sample size                                                                                                                                                                                                                                                                                                                          | P12  |
| 3  |                                                                     |     |                                                                                                                                                                                                                                                                                                                                                                                                              |      |
| 4  |                                                                     |     |                                                                                                                                                                                                                                                                                                                                                                                                              |      |
| 5  | <b>Methods: Assignment of interventions (for controlled trials)</b> |     |                                                                                                                                                                                                                                                                                                                                                                                                              |      |
| 6  | Allocation:                                                         |     |                                                                                                                                                                                                                                                                                                                                                                                                              |      |
| 7  |                                                                     |     |                                                                                                                                                                                                                                                                                                                                                                                                              |      |
| 8  |                                                                     |     |                                                                                                                                                                                                                                                                                                                                                                                                              |      |
| 9  | Sequence generation                                                 | 16a | Method of generating the allocation sequence (eg, computer-generated random numbers), and list of any factors for stratification. To reduce predictability of a random sequence, details of any planned restriction (eg, blocking) should be provided in a separate document that is unavailable to those who enrol participants or assign interventions                                                     | P7-8 |
| 10 |                                                                     |     |                                                                                                                                                                                                                                                                                                                                                                                                              |      |
| 11 |                                                                     |     |                                                                                                                                                                                                                                                                                                                                                                                                              |      |
| 12 |                                                                     |     |                                                                                                                                                                                                                                                                                                                                                                                                              |      |
| 13 |                                                                     |     |                                                                                                                                                                                                                                                                                                                                                                                                              |      |
| 14 |                                                                     |     |                                                                                                                                                                                                                                                                                                                                                                                                              |      |
| 15 |                                                                     |     |                                                                                                                                                                                                                                                                                                                                                                                                              |      |
| 16 |                                                                     |     |                                                                                                                                                                                                                                                                                                                                                                                                              |      |
| 17 |                                                                     |     |                                                                                                                                                                                                                                                                                                                                                                                                              |      |
| 18 | Allocation concealment mechanism                                    | 16b | Mechanism of implementing the allocation sequence (eg, central telephone; sequentially numbered, opaque, sealed envelopes), describing any steps to conceal the sequence until interventions are assigned                                                                                                                                                                                                    | P7-8 |
| 19 |                                                                     |     |                                                                                                                                                                                                                                                                                                                                                                                                              |      |
| 20 |                                                                     |     |                                                                                                                                                                                                                                                                                                                                                                                                              |      |
| 21 |                                                                     |     |                                                                                                                                                                                                                                                                                                                                                                                                              |      |
| 22 |                                                                     |     |                                                                                                                                                                                                                                                                                                                                                                                                              |      |
| 23 |                                                                     |     |                                                                                                                                                                                                                                                                                                                                                                                                              |      |
| 24 | Implementation                                                      | 16c | Who will generate the allocation sequence, who will enrol participants, and who will assign participants to interventions                                                                                                                                                                                                                                                                                    | P7-8 |
| 25 |                                                                     |     |                                                                                                                                                                                                                                                                                                                                                                                                              |      |
| 26 |                                                                     |     |                                                                                                                                                                                                                                                                                                                                                                                                              |      |
| 27 |                                                                     |     |                                                                                                                                                                                                                                                                                                                                                                                                              |      |
| 28 |                                                                     |     |                                                                                                                                                                                                                                                                                                                                                                                                              |      |
| 29 | Blinding (masking)                                                  | 17a | Who will be blinded after assignment to interventions (eg, trial participants, care providers, outcome assessors, data analysts), and how                                                                                                                                                                                                                                                                    | N/A  |
| 30 |                                                                     |     |                                                                                                                                                                                                                                                                                                                                                                                                              |      |
| 31 |                                                                     |     |                                                                                                                                                                                                                                                                                                                                                                                                              |      |
| 32 |                                                                     |     |                                                                                                                                                                                                                                                                                                                                                                                                              |      |
| 33 |                                                                     | 17b | If blinded, circumstances under which unblinding is permissible, and procedure for revealing a participant's allocated intervention during the trial                                                                                                                                                                                                                                                         | N/A  |
| 34 |                                                                     |     |                                                                                                                                                                                                                                                                                                                                                                                                              |      |
| 35 |                                                                     |     |                                                                                                                                                                                                                                                                                                                                                                                                              |      |
| 36 |                                                                     |     |                                                                                                                                                                                                                                                                                                                                                                                                              |      |
| 37 | <b>Methods: Data collection, management, and analysis</b>           |     |                                                                                                                                                                                                                                                                                                                                                                                                              |      |
| 38 |                                                                     |     |                                                                                                                                                                                                                                                                                                                                                                                                              |      |
| 39 | Data collection methods                                             | 18a | Plans for assessment and collection of outcome, baseline, and other trial data, including any related processes to promote data quality (eg, duplicate measurements, training of assessors) and a description of study instruments (eg, questionnaires, laboratory tests) along with their reliability and validity, if known. Reference to where data collection forms can be found, if not in the protocol | P9   |
| 40 |                                                                     |     |                                                                                                                                                                                                                                                                                                                                                                                                              |      |
| 41 |                                                                     |     |                                                                                                                                                                                                                                                                                                                                                                                                              |      |
| 42 |                                                                     |     |                                                                                                                                                                                                                                                                                                                                                                                                              |      |
| 43 |                                                                     |     |                                                                                                                                                                                                                                                                                                                                                                                                              |      |
| 44 |                                                                     |     |                                                                                                                                                                                                                                                                                                                                                                                                              |      |
| 45 |                                                                     |     |                                                                                                                                                                                                                                                                                                                                                                                                              |      |
| 46 |                                                                     |     |                                                                                                                                                                                                                                                                                                                                                                                                              |      |
| 47 |                                                                     |     |                                                                                                                                                                                                                                                                                                                                                                                                              |      |
| 48 |                                                                     |     |                                                                                                                                                                                                                                                                                                                                                                                                              |      |
| 49 |                                                                     | 18b | Plans to promote participant retention and complete follow-up, including list of any outcome data to be collected for participants who discontinue or deviate from intervention protocols                                                                                                                                                                                                                    | P9   |
| 50 |                                                                     |     |                                                                                                                                                                                                                                                                                                                                                                                                              |      |
| 51 |                                                                     |     |                                                                                                                                                                                                                                                                                                                                                                                                              |      |
| 52 |                                                                     |     |                                                                                                                                                                                                                                                                                                                                                                                                              |      |
| 53 |                                                                     |     |                                                                                                                                                                                                                                                                                                                                                                                                              |      |
| 54 | Data management                                                     | 19  | Plans for data entry, coding, security, and storage, including any related processes to promote data quality (eg, double data entry; range checks for data values). Reference to where details of data management procedures can be found, if not in the protocol                                                                                                                                            | P9   |
| 55 |                                                                     |     |                                                                                                                                                                                                                                                                                                                                                                                                              |      |
| 56 |                                                                     |     |                                                                                                                                                                                                                                                                                                                                                                                                              |      |
| 57 |                                                                     |     |                                                                                                                                                                                                                                                                                                                                                                                                              |      |
| 58 |                                                                     |     |                                                                                                                                                                                                                                                                                                                                                                                                              |      |
| 59 |                                                                     |     |                                                                                                                                                                                                                                                                                                                                                                                                              |      |
| 60 |                                                                     |     |                                                                                                                                                                                                                                                                                                                                                                                                              |      |



|    |             |     |                                                               |        |
|----|-------------|-----|---------------------------------------------------------------|--------|
| 1  |             |     |                                                               |        |
| 2  | Statistical | 20a | Statistical methods for analysing primary and secondary       |        |
| 3  | methods     |     | outcomes. Reference to where other details of the statistical | P12-13 |
| 4  |             |     | analysis plan can be found, if not in the protocol            |        |
| 5  |             |     |                                                               |        |
| 6  |             | 20b | Methods for any additional analyses (eg, subgroup and         |        |
| 7  |             |     | adjusted analyses)                                            | P13    |
| 8  |             |     |                                                               |        |
| 9  |             | 20c | Definition of analysis population relating to protocol non-   |        |
| 10 |             |     | adherence (eg, as randomised analysis), and any statistical   | P12    |
| 11 |             |     | methods to handle missing data (eg, multiple imputation)      |        |
| 12 |             |     |                                                               |        |
| 13 |             |     |                                                               |        |

### Methods: Monitoring

|    |                 |     |                                                                  |     |
|----|-----------------|-----|------------------------------------------------------------------|-----|
| 14 |                 |     |                                                                  |     |
| 15 |                 |     |                                                                  |     |
| 16 | Data monitoring | 21a | Composition of data monitoring committee (DMC);                  |     |
| 17 |                 |     | summary of its role and reporting structure; statement of        |     |
| 18 |                 |     | whether it is independent from the sponsor and competing         |     |
| 19 |                 |     | interests; and reference to where further details about its      | P10 |
| 20 |                 |     | charter can be found, if not in the protocol. Alternatively, an  |     |
| 21 |                 |     | explanation of why a DMC is not needed                           |     |
| 22 |                 |     |                                                                  |     |
| 23 |                 |     |                                                                  |     |
| 24 |                 | 21b | Description of any interim analyses and stopping                 |     |
| 25 |                 |     | guidelines, including who will have access to these interim      | N/A |
| 26 |                 |     | results and make the final decision to terminate the trial       |     |
| 27 |                 |     |                                                                  |     |
| 28 | Harms           | 22  | Plans for collecting, assessing, reporting, and managing         |     |
| 29 |                 |     | solicited and spontaneously reported adverse events and          | P10 |
| 30 |                 |     | other unintended effects of trial interventions or trial conduct |     |
| 31 |                 |     |                                                                  |     |
| 32 |                 |     |                                                                  |     |
| 33 | Auditing        | 23  | Frequency and procedures for auditing trial conduct, if any,     |     |
| 34 |                 |     | and whether the process will be independent from                 | N/A |
| 35 |                 |     | investigators and the sponsor                                    |     |
| 36 |                 |     |                                                                  |     |
| 37 |                 |     |                                                                  |     |

### Ethics and dissemination

|    |                 |     |                                                              |         |
|----|-----------------|-----|--------------------------------------------------------------|---------|
| 38 |                 |     |                                                              |         |
| 39 |                 |     |                                                              |         |
| 40 | Research ethics | 24  | Plans for seeking research ethics committee/institutional    |         |
| 41 | approval        |     | review board (REC/IRB) approval                              | P14     |
| 42 |                 |     |                                                              |         |
| 43 | Protocol        | 25  | Plans for communicating important protocol modifications     |         |
| 44 | amendments      |     | (eg, changes to eligibility criteria, outcomes, analyses) to |         |
| 45 |                 |     | relevant parties (eg, investigators, REC/IRBs, trial         | N/A     |
| 46 |                 |     | participants, trial registries, journals, regulators)        |         |
| 47 |                 |     |                                                              |         |
| 48 | Consent or      | 26a | Who will obtain informed consent or assent from potential    |         |
| 49 | assent          |     | trial participants or authorised surrogates, and how (see    | Figure2 |
| 50 |                 |     | Item 32)                                                     | P14     |
| 51 |                 |     |                                                              |         |
| 52 |                 |     |                                                              |         |
| 53 |                 | 26b | Additional consent provisions for collection and use of      |         |
| 54 |                 |     | participant data and biological specimens in ancillary       |         |
| 55 |                 |     | studies, if applicable                                       | N/A     |
| 56 |                 |     |                                                              |         |
| 57 |                 |     |                                                              |         |
| 58 |                 |     |                                                              |         |
| 59 |                 |     |                                                              |         |
| 60 |                 |     |                                                              |         |

|    |                               |     |                                                                                                                                                                                                                                                                                     |     |
|----|-------------------------------|-----|-------------------------------------------------------------------------------------------------------------------------------------------------------------------------------------------------------------------------------------------------------------------------------------|-----|
| 1  |                               |     |                                                                                                                                                                                                                                                                                     |     |
| 2  | Confidentiality               | 27  | How personal information about potential and enrolled participants will be collected, shared, and maintained in order to protect confidentiality before, during, and after the trial                                                                                                | P9  |
| 3  |                               |     |                                                                                                                                                                                                                                                                                     |     |
| 4  |                               |     |                                                                                                                                                                                                                                                                                     |     |
| 5  |                               |     |                                                                                                                                                                                                                                                                                     |     |
| 6  |                               |     |                                                                                                                                                                                                                                                                                     |     |
| 7  | Declaration of interests      | 28  | Financial and other competing interests for principal investigators for the overall trial and each study site                                                                                                                                                                       | P16 |
| 8  |                               |     |                                                                                                                                                                                                                                                                                     |     |
| 9  |                               |     |                                                                                                                                                                                                                                                                                     |     |
| 10 | Access to data                | 29  | Statement of who will have access to the final trial dataset, and disclosure of contractual agreements that limit such access for investigators                                                                                                                                     | N/A |
| 11 |                               |     |                                                                                                                                                                                                                                                                                     |     |
| 12 |                               |     |                                                                                                                                                                                                                                                                                     |     |
| 13 |                               |     |                                                                                                                                                                                                                                                                                     |     |
| 14 |                               |     |                                                                                                                                                                                                                                                                                     |     |
| 15 | Ancillary and post-trial care | 30  | Provisions, if any, for ancillary and post-trial care, and for compensation to those who suffer harm from trial participation                                                                                                                                                       | P10 |
| 16 |                               |     |                                                                                                                                                                                                                                                                                     |     |
| 17 |                               |     |                                                                                                                                                                                                                                                                                     |     |
| 18 |                               |     |                                                                                                                                                                                                                                                                                     |     |
| 19 | Dissemination policy          | 31a | Plans for investigators and sponsor to communicate trial results to participants, healthcare professionals, the public, and other relevant groups (eg, via publication, reporting in results databases, or other data sharing arrangements), including any publication restrictions | N/A |
| 20 |                               |     |                                                                                                                                                                                                                                                                                     |     |
| 21 |                               |     |                                                                                                                                                                                                                                                                                     |     |
| 22 |                               |     |                                                                                                                                                                                                                                                                                     |     |
| 23 |                               |     |                                                                                                                                                                                                                                                                                     |     |
| 24 |                               |     |                                                                                                                                                                                                                                                                                     |     |
| 25 |                               |     |                                                                                                                                                                                                                                                                                     |     |
| 26 |                               |     |                                                                                                                                                                                                                                                                                     |     |
| 27 |                               | 31b | Authorship eligibility guidelines and any intended use of professional writers                                                                                                                                                                                                      | P15 |
| 28 |                               |     |                                                                                                                                                                                                                                                                                     |     |
| 29 |                               |     |                                                                                                                                                                                                                                                                                     |     |
| 30 |                               | 31c | Plans, if any, for granting public access to the full protocol, participant-level dataset, and statistical code                                                                                                                                                                     | N/A |
| 31 |                               |     |                                                                                                                                                                                                                                                                                     |     |
| 32 |                               |     |                                                                                                                                                                                                                                                                                     |     |
| 33 | <b>Appendices</b>             |     |                                                                                                                                                                                                                                                                                     |     |
| 34 |                               |     |                                                                                                                                                                                                                                                                                     |     |
| 35 | Informed consent materials    | 32  | Model consent form and other related documentation given to participants and authorised surrogates                                                                                                                                                                                  | N/A |
| 36 |                               |     |                                                                                                                                                                                                                                                                                     |     |
| 37 |                               |     |                                                                                                                                                                                                                                                                                     |     |
| 38 | Biological specimens          | 33  | Plans for collection, laboratory evaluation, and storage of biological specimens for genetic or molecular analysis in the current trial and for future use in ancillary studies, if applicable                                                                                      | N/A |
| 39 |                               |     |                                                                                                                                                                                                                                                                                     |     |
| 40 |                               |     |                                                                                                                                                                                                                                                                                     |     |
| 41 |                               |     |                                                                                                                                                                                                                                                                                     |     |
| 42 |                               |     |                                                                                                                                                                                                                                                                                     |     |
| 43 |                               |     |                                                                                                                                                                                                                                                                                     |     |

\*It is strongly recommended that this checklist be read in conjunction with the SPIRIT 2013 Explanation & Elaboration for important clarification on the items. Amendments to the protocol should be tracked and dated. The SPIRIT checklist is copyrighted by the SPIRIT Group under the Creative Commons "[Attribution-NonCommercial-NoDerivs 3.0 Unported](https://creativecommons.org/licenses/by-nc-nd/3.0/)" license.

# BMJ Open

## Restrictive transfusion strategy for critically injured patients (RESTRIC) trial: A study protocol for a cluster-randomised, crossover non-inferiority trial

|                                 |                                                                                                                                                                                                                                                                                                                                                                                                                                                                                                                                                                                                                                                                                                                                                                                                                                                                                                                                                                                                                                                                                                                                                                                                                                                                                                                                                                                                                                   |
|---------------------------------|-----------------------------------------------------------------------------------------------------------------------------------------------------------------------------------------------------------------------------------------------------------------------------------------------------------------------------------------------------------------------------------------------------------------------------------------------------------------------------------------------------------------------------------------------------------------------------------------------------------------------------------------------------------------------------------------------------------------------------------------------------------------------------------------------------------------------------------------------------------------------------------------------------------------------------------------------------------------------------------------------------------------------------------------------------------------------------------------------------------------------------------------------------------------------------------------------------------------------------------------------------------------------------------------------------------------------------------------------------------------------------------------------------------------------------------|
| Journal:                        | <i>BMJ Open</i>                                                                                                                                                                                                                                                                                                                                                                                                                                                                                                                                                                                                                                                                                                                                                                                                                                                                                                                                                                                                                                                                                                                                                                                                                                                                                                                                                                                                                   |
| Manuscript ID                   | bmjopen-2020-037238.R1                                                                                                                                                                                                                                                                                                                                                                                                                                                                                                                                                                                                                                                                                                                                                                                                                                                                                                                                                                                                                                                                                                                                                                                                                                                                                                                                                                                                            |
| Article Type:                   | Protocol                                                                                                                                                                                                                                                                                                                                                                                                                                                                                                                                                                                                                                                                                                                                                                                                                                                                                                                                                                                                                                                                                                                                                                                                                                                                                                                                                                                                                          |
| Date Submitted by the Author:   | 08-Jun-2020                                                                                                                                                                                                                                                                                                                                                                                                                                                                                                                                                                                                                                                                                                                                                                                                                                                                                                                                                                                                                                                                                                                                                                                                                                                                                                                                                                                                                       |
| Complete List of Authors:       | Hayakawa, Mineji; Hokkaido Daigaku Byoin, Department of Emergency Medicine<br>Tagami, Takashi; Nippon Medical School Hospital, Department of Emergency and Critical Care Medicine; Tokyo Daigaku, Department of Clinical Epidemiology and Health Economics, School of Public Health<br>Iijima, Hiroaki; Amgen Astellas BioPharma K.K.<br>Kudo, Daisuke; Tohoku University School of Medicine, Emergency and Critical Care Medicine<br>Sekine, Kazuhiko ; Saiseikai Central Hospital, Department of Emergency and Critical Care Medicine<br>Ogura, Takayuki; Maebashi Red Cross Hospital, Emergency Medicine & Critical Care Medicine<br>Yumoto, Tetsuya; Okayama University Graduate School of Medicine Dentistry and Pharmaceutical Sciences, Emergency and Critical Care Medicine<br>Kondo, Yutaka; Juntendo Daigaku Igakubu Fuzoku Urayasu Byoin, Department of Emergency and Critical Care Medicine<br>Endo, Akira ; Medical Hospital of Tokyo Medical and Dental University, Trauma and Acute Critical Care Centre<br>Ito, Kaori; Teikyo University School of Medicine Graduate School of Medicine, Department of Emergency Medicine, Division of Acute Care Surgery<br>Matsumura, Yosuke; Chiba University Graduate School of Medicine School of Medicine, Department of Emergency and Critical Care Medicine<br>Kushimoto, Shigeki; Tohoku University School of Medicine, Division of Emergency and Critical Care Medicine |
| <b>Primary Subject Heading</b>: | Emergency medicine                                                                                                                                                                                                                                                                                                                                                                                                                                                                                                                                                                                                                                                                                                                                                                                                                                                                                                                                                                                                                                                                                                                                                                                                                                                                                                                                                                                                                |
| Secondary Subject Heading:      | Intensive care, Haematology (incl blood transfusion)                                                                                                                                                                                                                                                                                                                                                                                                                                                                                                                                                                                                                                                                                                                                                                                                                                                                                                                                                                                                                                                                                                                                                                                                                                                                                                                                                                              |
| Keywords:                       | ACCIDENT & EMERGENCY MEDICINE, HAEMATOLOGY, Blood bank & transfusion medicine < HAEMATOLOGY, TRAUMA MANAGEMENT                                                                                                                                                                                                                                                                                                                                                                                                                                                                                                                                                                                                                                                                                                                                                                                                                                                                                                                                                                                                                                                                                                                                                                                                                                                                                                                    |
|                                 |                                                                                                                                                                                                                                                                                                                                                                                                                                                                                                                                                                                                                                                                                                                                                                                                                                                                                                                                                                                                                                                                                                                                                                                                                                                                                                                                                                                                                                   |

1  
2  
3  
4  
5  
6  
7  
8  
9  
10  
11  
12  
13  
14  
15  
16  
17  
18  
19  
20  
21  
22  
23  
24  
25  
26  
27  
28  
29  
30  
31  
32  
33  
34  
35  
36  
37  
38  
39  
40  
41  
42  
43  
44  
45  
46  
47  
48  
49  
50  
51  
52  
53  
54  
55  
56  
57  
58  
59  
60

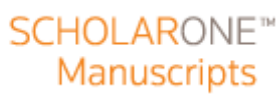



I, the Submitting Author has the right to grant and does grant on behalf of all authors of the Work (as defined in the below author licence), an exclusive licence and/or a non-exclusive licence for contributions from authors who are: i) UK Crown employees; ii) where BMJ has agreed a CC-BY licence shall apply, and/or iii) in accordance with the terms applicable for US Federal Government officers or employees acting as part of their official duties; on a worldwide, perpetual, irrevocable, royalty-free basis to BMJ Publishing Group Ltd ("BMJ") its licensees and where the relevant Journal is co-owned by BMJ to the co-owners of the Journal, to publish the Work in this journal and any other BMJ products and to exploit all rights, as set out in our [licence](#).

The Submitting Author accepts and understands that any supply made under these terms is made by BMJ to the Submitting Author unless you are acting as an employee on behalf of your employer or a postgraduate student of an affiliated institution which is paying any applicable article publishing charge ("APC") for Open Access articles. Where the Submitting Author wishes to make the Work available on an Open Access basis (and intends to pay the relevant APC), the terms of reuse of such Open Access shall be governed by a Creative Commons licence – details of these licences and which [Creative Commons](#) licence will apply to this Work are set out in our licence referred to above.

Other than as permitted in any relevant BMJ Author's Self Archiving Policies, I confirm this Work has not been accepted for publication elsewhere, is not being considered for publication elsewhere and does not duplicate material already published. I confirm all authors consent to publication of this Work and authorise the granting of this licence.

1  
2  
3 Restrictive transfusion strategy for critically injured patients (RESTRIC) trial: A study protocol for a cluster-  
4 randomised, crossover non-inferiority trial  
5  
6  
7  
8

9 Mineji Hayakawa,<sup>1</sup> Takashi Tagami,<sup>2, 3</sup> Hiroaki Iijima,<sup>4</sup> Daisuke Kudo,<sup>5</sup> Kazuhiko Sekine,<sup>6</sup> Takayuki Ogura,<sup>7</sup>  
10 Tetsuya Yumoto,<sup>8</sup> Yutaka Kondo,<sup>9</sup> Akira Endo,<sup>10</sup> Kaori Ito,<sup>11</sup> Yosuke Matsumura,<sup>12</sup> Shigeki Kushimoto<sup>5</sup>  
11  
12  
13  
14

15  
16 <sup>1</sup> Department of Emergency Medicine, Hokkaido University Hospital  
17

18 <sup>2</sup> Department of Emergency and Critical Care Medicine, Nippon Medical School Musashi Kosugi Hospital  
19

20 <sup>3</sup> Department of Clinical Epidemiology and Health Economics, School of Public Health, The University of  
21 Tokyo  
22  
23

24 <sup>4</sup> Amgen Astellas BioPharma K.K. (At the planning of the trial, belonged the Clinical Research and Medical  
25 Innovation Center, Hokkaido University Hospital)  
26  
27

28 <sup>5</sup> Division of Emergency and Critical Care Medicine, Tohoku University Graduate School of Medicine  
29

30 <sup>6</sup> Department of Emergency and Critical Care Medicine, Tokyo Saiseikai Central Hospital  
31  
32

33 <sup>7</sup> Department of Emergency and Critical Care Medicine, Japan Red Cross Maebashi Hospital  
34

35 <sup>8</sup> Department of Emergency, Critical Care, and Disaster Medicine, Okayama University Graduate School of  
36 Medicine, Dentistry and Pharmaceutical Sciences  
37  
38

39 <sup>9</sup> Department of Emergency and Critical Care Medicine, Juntendo University Urayasu Hospital  
40

41 <sup>10</sup> Trauma and Acute Critical Care Centre, Tokyo Medical and Dental University Hospital of Medicine  
42

43 <sup>11</sup> Department of Emergency Medicine, Division of Acute Care Surgery, Teikyo University School of Medicine  
44

45 <sup>12</sup> Department of Emergency and Critical Care Medicine, Chiba University Graduate School of Medicine  
46  
47  
48

## 49 **Correspondence**

50  
51 Mineji Hayakawa, MD, PhD

52  
53 Department of Emergency Medicine, Hokkaido University Hospital

54  
55 N14W5 Kita-ku, Sapporo 060-8648, Japan

56  
57 Phone: +81-11-706-7377  
58  
59  
60

1  
2  
3 Fax: +81-11-706-7378  
4

5 E-mail: [mineji@dream.com](mailto:mineji@dream.com)  
6  
7  
8  
9  
10  
11  
12  
13  
14  
15  
16  
17  
18  
19  
20  
21  
22  
23  
24  
25  
26  
27  
28  
29  
30  
31  
32  
33  
34  
35  
36  
37  
38  
39  
40  
41  
42  
43  
44  
45  
46  
47  
48  
49  
50  
51  
52  
53  
54  
55  
56  
57  
58  
59  
60

For peer review only

## ABSTRACT

**Introduction:** Resuscitation using blood products is critical during the acute post-injury period. However, the optimal target haemoglobin (Hb) levels have not been adequately investigated. With the Restrictive Transfusion Strategy for Critically Injured Patients (RESTRIC) trial, we aim to compare the restrictive and liberal red blood cell (RBC) transfusion strategies.

**Methods and analysis:** This is a cluster-randomised, crossover, non-inferiority trial of patients with severe trauma at 22 hospitals that have been randomised in a 1:1 ratio based on the use of a restrictive or liberal transfusion strategy with target Hb levels of 7–9 or 10–12 g/dL, respectively, during the first year. Subsequently, after a 1-month washout period, another transfusion strategy will be applied for an additional year. RBC transfusion requirements are usually unclear on arrival at the emergency department. Therefore, patients with severe bleeding, which could lead to haemorrhagic shock, will be included in the trial based on the attending physician's judgement. Each RBC transfusion strategy will be applied until 7 days post-admission to the hospital or discharge from the intensive care unit. The outcomes measured will include the 28-day survival rate after arrival at the emergency department (primary), the cumulative amount of blood transfused, event-free days, and frequency of transfusion-associated lung injury and organ failure (secondary). Demonstration of the non-inferiority of restrictive transfusion will emphasise its clinical advantages.

**Ethics and dissemination:** The trial will be performed according to the Japanese and international ethical guidelines. It has been approved by the Ethics Committee of each participating hospital and The Japanese Association for the Surgery of Trauma (JAST). Written informed consent will be obtained from all patients or their representatives. The results of the trial will be disseminated to the participating hospitals and board-certified educational institutions of JAST, submitted to peer-reviewed journals for publication, and presented at congresses.

**Registration details:** UMIN Clinical Trials Registry; UMIN000034405. Registered 8 October 2018.

[https://upload.umin.ac.jp/cgi-open-bin/ctr\\_e/ctr\\_view.cgi?recptno=R000038522](https://upload.umin.ac.jp/cgi-open-bin/ctr_e/ctr_view.cgi?recptno=R000038522)



1  
2  
3 **Keywords:** emergency department, massive bleeding, restrictive transfusion strategy, RESTRIC trial,  
4 transfusion-associated lung injury, trauma  
5  
6  
7  
8

9 **STRENGTHS AND LIMITATIONS OF THIS STUDY**  
10

- 11 • During the acute post-injury period, the appropriate strategy for red blood cell transfusion has not been  
12 investigated.  
13
- 14 • This trial will be the first to determine the optimal haemoglobin level during the acute post-injury period  
15 in patients with severe trauma.  
16
- 17 • This multicentre trial will have a cluster-randomised, crossover non-inferiority design.  
18
- 19 • The two study interventions will be restricted or liberal red blood cell transfusion initiated immediately  
20 after the patient's arrival at the emergency department.  
21
- 22 • Each red blood cell transfusion strategy will be defined by a target haemoglobin level rather than by the  
23 actual patient's haemoglobin level.  
24  
25  
26  
27  
28  
29  
30  
31  
32  
33  
34  
35  
36  
37  
38  
39  
40  
41  
42  
43  
44  
45  
46  
47  
48  
49  
50  
51  
52  
53  
54  
55  
56  
57  
58  
59  
60

## INTRODUCTION

Bleeding is a major cause of death after severe trauma. Although early haemostatic procedures are most important, resuscitation using crystalloid and blood products also plays a crucial role in the early phase of management of patients with severe trauma. While the transfusion of fresh frozen plasma has been widely evaluated in the management of trauma-associated coagulopathy during the acute post-injury period,<sup>1-7</sup> the transfusion of red blood cells (RBCs) has not been investigated adequately, and the optimal target levels of haemoglobin (Hb) in the early phase of treatment remain unclear.

The European guidelines for the management of major bleeding and coagulopathy recommend target Hb levels of 7–9 g/dL.<sup>8</sup> This is based mainly on the results of a post-hoc analysis of the Transfusion Requirements in Critical Care (TRICC) trial,<sup>9</sup> which compared a restrictive transfusion strategy (target Hb level: 7–9 g/dL) with a liberal transfusion strategy (target Hb level: 10–12 g/dL).<sup>10</sup> However, as the TRICC trial included critically ill patients after admission to intensive care units (ICUs), information regarding the patient characteristics, haemostatic procedures, and transfusion before admission to the ICUs remains unclear.<sup>10</sup> Furthermore, the trial excluded patients with active blood loss.<sup>10</sup> Therefore, it is not appropriate to apply the results of this trial and its post-hoc analysis to patients in the early phase of severe trauma.<sup>9 10</sup> The European guidelines also state that ‘it should be emphasised that this study was neither designed nor powered to answer these questions with precision’ in the rationale section.<sup>8</sup>

A low Hb level is a possible cause of hypoxic damage to various organs. In patients with traumatic brain injury, a low Hb level is associated with particularly concerning neurological outcomes.<sup>11</sup> Recently, a randomised controlled trial that compared two Hb transfusion thresholds (7.0 or 10.0 g/dL) in patients with traumatic brain injury indicated no differences in the neurological outcomes and mortality rates between the use of low and high Hb transfusion thresholds.<sup>12</sup> However, 38% of the patients included in that study were not transfused with any packed RBCs.<sup>12</sup>

To address the above-mentioned lack of clarity regarding the clinical impacts of a restrictive RBC transfusion strategy in trauma patients during the acute post-injury period, we are conducting a cluster-randomised, crossover non-inferiority trial to compare restrictive and liberal RBC transfusion strategies.

## METHODS AND ANALYSIS

### Trial design

The Restrictive Transfusion strategy for Critically Injured Patients (RESTRIC) trial is a cluster-randomised, crossover non-inferiority multicentre trial of patients with severe trauma. This pragmatic trial aims to reproduce real-world settings as closely as possible. The RESTRIC trial applies a cluster-randomised design that enables the initiation of study interventions immediately after arrival at the emergency department (ED), and a crossover design to reduce the confounding effects between different hospitals.

Twenty-two hospitals in Japan are participating in the RESTRIC trial (Table 1). These hospitals are tertiary emergency medical facilities that provide emergency and intensive care treatments to patients with severe trauma. The participating hospitals have been randomised into two study schedules at a 1:1 ratio based on a pre-created random assignment table to either a restrictive transfusion strategy (target Hb level: 7–9 g/dL) or a liberal transfusion strategy (target Hb level: 10–12 g/dL). After the randomisation, the hospitals will apply the first transfusion strategy for 1 year (first study period). After a washout period of 1 month after the end of the first study period, the second transfusion strategy will be applied for another 1 year (second study period; Figure 1).

The allocated transfusion strategy is posted in each hospital in order to provide opt-out opportunities to patients and their next of kin. The allocated transfusion strategy will be applied for all trauma patients during the initial phase after arrival at the ED. After obtaining the consent for registration from the patients or their representatives, the patients will be registered in the trial and the transfusion strategy will be applied until a defined period. If the registration to the trial is declined, the transfusion strategy will be continued based on the physician's decision.

### Patients

Upon arrival at the ED, the requirement for RBC transfusion is usually unclear. Therefore, the inclusion criteria include trauma patients aged  $\geq 20$  years with one of the following complications based on the judgment of the attending physician (Figure 2):

1. Severe bleeding that can result in circulatory shock,

- 2
- 3 2. Suspicion of such bleeding after arrival at the ED and
- 4
- 5 3. Possibility of inducing such bleeding by surgical procedures during the acute phase of trauma.
- 6

7 The following exclusion criteria have been set:

- 9 1) Cardiac arrest before or upon arrival at the hospital,
- 10
- 11 2) Transfer from another hospital,
- 12
- 13 3) Physician's decision to withdraw active treatment at the initial assessment,
- 14
- 15 4) Severe burn injuries ( $\geq 15\%$  of the body surface),
- 16
- 17 5) Pregnancy,
- 18
- 19 6) Chronic anaemia (Hb level  $\leq 7$  g/dL) and
- 20
- 21 7) Known objection to blood transfusions.
- 22
- 23
- 24
- 25

## 26 **Intervention**

27  
28 In severe trauma patients with active bleeding, RBC transfusion is frequently initiated before  
29 confirming a decrease in Hb levels. Therefore, each RBC transfusion strategy is defined by the target Hb level  
30 rather than the current Hb level. The timing of RBC transfusion initiation in a patient with active bleeding is  
31 determined by the attending physician based on not only the Hb levels, but also on hemodynamic instability.  
32  
33  
34  
35  
36  
37  
38  
39  
40  
41  
42  
43  
44  
45  
46  
47  
48  
49  
50  
51  
52  
53  
54  
55  
56  
57  
58  
59  
60  
61  
62  
63  
64  
65  
66  
67  
68  
69  
70  
71  
72  
73  
74  
75  
76  
77  
78  
79  
80  
81  
82  
83  
84  
85  
86  
87  
88  
89  
90  
91  
92  
93  
94  
95  
96  
97  
98  
99  
100  
101  
102  
103  
104  
105  
106  
107  
108  
109  
110  
111  
112  
113  
114  
115  
116  
117  
118  
119  
120  
121  
122  
123  
124  
125  
126  
127  
128  
129  
130  
131  
132  
133  
134  
135  
136  
137  
138  
139  
140  
141  
142  
143  
144  
145  
146  
147  
148  
149  
150  
151  
152  
153  
154  
155  
156  
157  
158  
159  
160  
161  
162  
163  
164  
165  
166  
167  
168  
169  
170  
171  
172  
173  
174  
175  
176  
177  
178  
179  
180  
181  
182  
183  
184  
185  
186  
187  
188  
189  
190  
191  
192  
193  
194  
195  
196  
197  
198  
199  
200  
201  
202  
203  
204  
205  
206  
207  
208  
209  
210  
211  
212  
213  
214  
215  
216  
217  
218  
219  
220  
221  
222  
223  
224  
225  
226  
227  
228  
229  
230  
231  
232  
233  
234  
235  
236  
237  
238  
239  
240  
241  
242  
243  
244  
245  
246  
247  
248  
249  
250  
251  
252  
253  
254  
255  
256  
257  
258  
259  
260  
261  
262  
263  
264  
265  
266  
267  
268  
269  
270  
271  
272  
273  
274  
275  
276  
277  
278  
279  
280  
281  
282  
283  
284  
285  
286  
287  
288  
289  
290  
291  
292  
293  
294  
295  
296  
297  
298  
299  
300  
301  
302  
303  
304  
305  
306  
307  
308  
309  
310  
311  
312  
313  
314  
315  
316  
317  
318  
319  
320  
321  
322  
323  
324  
325  
326  
327  
328  
329  
330  
331  
332  
333  
334  
335  
336  
337  
338  
339  
340  
341  
342  
343  
344  
345  
346  
347  
348  
349  
350  
351  
352  
353  
354  
355  
356  
357  
358  
359  
360  
361  
362  
363  
364  
365  
366  
367  
368  
369  
370  
371  
372  
373  
374  
375  
376  
377  
378  
379  
380  
381  
382  
383  
384  
385  
386  
387  
388  
389  
390  
391  
392  
393  
394  
395  
396  
397  
398  
399  
400  
401  
402  
403  
404  
405  
406  
407  
408  
409  
410  
411  
412  
413  
414  
415  
416  
417  
418  
419  
420  
421  
422  
423  
424  
425  
426  
427  
428  
429  
430  
431  
432  
433  
434  
435  
436  
437  
438  
439  
440  
441  
442  
443  
444  
445  
446  
447  
448  
449  
450  
451  
452  
453  
454  
455  
456  
457  
458  
459  
460  
461  
462  
463  
464  
465  
466  
467  
468  
469  
470  
471  
472  
473  
474  
475  
476  
477  
478  
479  
480  
481  
482  
483  
484  
485  
486  
487  
488  
489  
490  
491  
492  
493  
494  
495  
496  
497  
498  
499  
500  
501  
502  
503  
504  
505  
506  
507  
508  
509  
510  
511  
512  
513  
514  
515  
516  
517  
518  
519  
520  
521  
522  
523  
524  
525  
526  
527  
528  
529  
530  
531  
532  
533  
534  
535  
536  
537  
538  
539  
540  
541  
542  
543  
544  
545  
546  
547  
548  
549  
550  
551  
552  
553  
554  
555  
556  
557  
558  
559  
560  
561  
562  
563  
564  
565  
566  
567  
568  
569  
570  
571  
572  
573  
574  
575  
576  
577  
578  
579  
580  
581  
582  
583  
584  
585  
586  
587  
588  
589  
590  
591  
592  
593  
594  
595  
596  
597  
598  
599  
600  
601  
602  
603  
604  
605  
606  
607  
608  
609  
610  
611  
612  
613  
614  
615  
616  
617  
618  
619  
620  
621  
622  
623  
624  
625  
626  
627  
628  
629  
630  
631  
632  
633  
634  
635  
636  
637  
638  
639  
640  
641  
642  
643  
644  
645  
646  
647  
648  
649  
650  
651  
652  
653  
654  
655  
656  
657  
658  
659  
660  
661  
662  
663  
664  
665  
666  
667  
668  
669  
670  
671  
672  
673  
674  
675  
676  
677  
678  
679  
680  
681  
682  
683  
684  
685  
686  
687  
688  
689  
690  
691  
692  
693  
694  
695  
696  
697  
698  
699  
700  
701  
702  
703  
704  
705  
706  
707  
708  
709  
710  
711  
712  
713  
714  
715  
716  
717  
718  
719  
720  
721  
722  
723  
724  
725  
726  
727  
728  
729  
730  
731  
732  
733  
734  
735  
736  
737  
738  
739  
740  
741  
742  
743  
744  
745  
746  
747  
748  
749  
750  
751  
752  
753  
754  
755  
756  
757  
758  
759  
760  
761  
762  
763  
764  
765  
766  
767  
768  
769  
770  
771  
772  
773  
774  
775  
776  
777  
778  
779  
780  
781  
782  
783  
784  
785  
786  
787  
788  
789  
790  
791  
792  
793  
794  
795  
796  
797  
798  
799  
800  
801  
802  
803  
804  
805  
806  
807  
808  
809  
810  
811  
812  
813  
814  
815  
816  
817  
818  
819  
820  
821  
822  
823  
824  
825  
826  
827  
828  
829  
830  
831  
832  
833  
834  
835  
836  
837  
838  
839  
840  
841  
842  
843  
844  
845  
846  
847  
848  
849  
850  
851  
852  
853  
854  
855  
856  
857  
858  
859  
860  
861  
862  
863  
864  
865  
866  
867  
868  
869  
870  
871  
872  
873  
874  
875  
876  
877  
878  
879  
880  
881  
882  
883  
884  
885  
886  
887  
888  
889  
890  
891  
892  
893  
894  
895  
896  
897  
898  
899  
900  
901  
902  
903  
904  
905  
906  
907  
908  
909  
910  
911  
912  
913  
914  
915  
916  
917  
918  
919  
920  
921  
922  
923  
924  
925  
926  
927  
928  
929  
930  
931  
932  
933  
934  
935  
936  
937  
938  
939  
940  
941  
942  
943  
944  
945  
946  
947  
948  
949  
950  
951  
952  
953  
954  
955  
956  
957  
958  
959  
960  
961  
962  
963  
964  
965  
966  
967  
968  
969  
970  
971  
972  
973  
974  
975  
976  
977  
978  
979  
980  
981  
982  
983  
984  
985  
986  
987  
988  
989  
990  
991  
992  
993  
994  
995  
996  
997  
998  
999  
1000

## 43 **Assessments and follow-up**

44  
45  
46  
47  
48  
49  
50  
51  
52  
53  
54  
55  
56  
57  
58  
59  
60  
61  
62  
63  
64  
65  
66  
67  
68  
69  
70  
71  
72  
73  
74  
75  
76  
77  
78  
79  
80  
81  
82  
83  
84  
85  
86  
87  
88  
89  
90  
91  
92  
93  
94  
95  
96  
97  
98  
99  
100  
101  
102  
103  
104  
105  
106  
107  
108  
109  
110  
111  
112  
113  
114  
115  
116  
117  
118  
119  
120  
121  
122  
123  
124  
125  
126  
127  
128  
129  
130  
131  
132  
133  
134  
135  
136  
137  
138  
139  
140  
141  
142  
143  
144  
145  
146  
147  
148  
149  
150  
151  
152  
153  
154  
155  
156  
157  
158  
159  
160  
161  
162  
163  
164  
165  
166  
167  
168  
169  
170  
171  
172  
173  
174  
175  
176  
177  
178  
179  
180  
181  
182  
183  
184  
185  
186  
187  
188  
189  
190  
191  
192  
193  
194  
195  
196  
197  
198  
199  
200  
201  
202  
203  
204  
205  
206  
207  
208  
209  
210  
211  
212  
213  
214  
215  
216  
217  
218  
219  
220  
221  
222  
223  
224  
225  
226  
227  
228  
229  
230  
231  
232  
233  
234  
235  
236  
237  
238  
239  
240  
241  
242  
243  
244  
245  
246  
247  
248  
249  
250  
251  
252  
253  
254  
255  
256  
257  
258  
259  
260  
261  
262  
263  
264  
265  
266  
267  
268  
269  
270  
271  
272  
273  
274  
275  
276  
277  
278  
279  
280  
281  
282  
283  
284  
285  
286  
287  
288  
289  
290  
291  
292  
293  
294  
295  
296  
297  
298  
299  
300  
301  
302  
303  
304  
305  
306  
307  
308  
309  
310  
311  
312  
313  
314  
315  
316  
317  
318  
319  
320  
321  
322  
323  
324  
325  
326  
327  
328  
329  
330  
331  
332  
333  
334  
335  
336  
337  
338  
339  
340  
341  
342  
343  
344  
345  
346  
347  
348  
349  
350  
351  
352  
353  
354  
355  
356  
357  
358  
359  
360  
361  
362  
363  
364  
365  
366  
367  
368  
369  
370  
371  
372  
373  
374  
375  
376  
377  
378  
379  
380  
381  
382  
383  
384  
385  
386  
387  
388  
389  
390  
391  
392  
393  
394  
395  
396  
397  
398  
399  
400  
401  
402  
403  
404  
405  
406  
407  
408  
409  
410  
411  
412  
413  
414  
415  
416  
417  
418  
419  
420  
421  
422  
423  
424  
425  
426  
427  
428  
429  
430  
431  
432  
433  
434  
435  
436  
437  
438  
439  
440  
441  
442  
443  
444  
445  
446  
447  
448  
449  
450  
451  
452  
453  
454  
455  
456  
457  
458  
459  
460  
461  
462  
463  
464  
465  
466  
467  
468  
469  
470  
471  
472  
473  
474  
475  
476  
477  
478  
479  
480  
481  
482  
483  
484  
485  
486  
487  
488  
489  
490  
491  
492  
493  
494  
495  
496  
497  
498  
499  
500  
501  
502  
503  
504  
505  
506  
507  
508  
509  
510  
511  
512  
513  
514  
515  
516  
517  
518  
519  
520  
521  
522  
523  
524  
525  
526  
527  
528  
529  
530  
531  
532  
533  
534  
535  
536  
537  
538  
539  
540  
541  
542  
543  
544  
545  
546  
547  
548  
549  
550  
551  
552  
553  
554  
555  
556  
557  
558  
559  
560  
561  
562  
563  
564  
565  
566  
567  
568  
569  
570  
571  
572  
573  
574  
575  
576  
577  
578  
579  
580  
581  
582  
583  
584  
585  
586  
587  
588  
589  
590  
591  
592  
593  
594  
595  
596  
597  
598  
599  
600  
601  
602  
603  
604  
605  
606  
607  
608  
609  
610  
611  
612  
613  
614  
615  
616  
617  
618  
619  
620  
621  
622  
623  
624  
625  
626  
627  
628  
629  
630  
631  
632  
633  
634  
635  
636  
637  
638  
639  
640  
641  
642  
643  
644  
645  
646  
647  
648  
649  
650  
651  
652  
653  
654  
655  
656  
657  
658  
659  
660  
661  
662  
663  
664  
665  
666  
667  
668  
669  
670  
671  
672  
673  
674  
675  
676  
677  
678  
679  
680  
681  
682  
683  
684  
685  
686  
687  
688  
689  
690  
691  
692  
693  
694  
695  
696  
697  
698  
699  
700  
701  
702  
703  
704  
705  
706  
707  
708  
709  
710  
711  
712  
713  
714  
715  
716  
717  
718  
719  
720  
721  
722  
723  
724  
725  
726  
727  
728  
729  
730  
731  
732  
733  
734  
735  
736  
737  
738  
739  
740  
741  
742  
743  
744  
745  
746  
747  
748  
749  
750  
751  
752  
753  
754  
755  
756  
757  
758  
759  
760  
761  
762  
763  
764  
765  
766  
767  
768  
769  
770  
771  
772  
773  
774  
775  
776  
777  
778  
779  
780  
781  
782  
783  
784  
785  
786  
787  
788  
789  
790  
791  
792  
793  
794  
795  
796  
797  
798  
799  
800  
801  
802  
803  
804  
805  
806  
807  
808  
809  
810  
811  
812  
813  
814  
815  
816  
817  
818  
819  
820  
821  
822  
823  
824  
825  
826  
827  
828  
829  
830  
831  
832  
833  
834  
835  
836  
837  
838  
839  
840  
841  
842  
843  
844  
845  
846  
847  
848  
849  
850  
851  
852  
853  
854  
855  
856  
857  
858  
859  
860  
861  
862  
863  
864  
865  
866  
867  
868  
869  
870  
871  
872  
873  
874  
875  
876  
877  
878  
879  
880  
881  
882  
883  
884  
885  
886  
887  
888  
889  
890  
891  
892  
893  
894  
895  
896  
897  
898  
899  
900  
901  
902  
903  
904  
905  
906  
907  
908  
909  
910  
911  
912  
913  
914  
915  
916  
917  
918  
919  
920  
921  
922  
923  
924  
925  
926  
927  
928  
929  
930  
931  
932  
933  
934  
935  
936  
937  
938  
939  
940  
941  
942  
943  
944  
945  
946  
947  
948  
949  
950  
951  
952  
953  
954  
955  
956  
957  
958  
959  
960  
961  
962  
963  
964  
965  
966  
967  
968  
969  
970  
971  
972  
973  
974  
975  
976  
977  
978  
979  
980  
981  
982  
983  
984  
985  
986  
987  
988  
989  
990  
991  
992  
993  
994  
995  
996  
997  
998  
999  
1000

### Safety monitoring

A safety monitoring board comprising two independent experts who are not involved in the conduct of the trial will oversee the safety of the trial. Significant adverse events (SAEs) will be recorded immediately in the patient's medical record and in the electronic data capture system (NorthNet, <https://www.crmic-huhp.jp/northnet/edc/>) which are same as the system that recorded the assessment data of patients. The treating physician will immediately report any SAEs to the site investigator, who will in turn report them to the chief of each site and the principal investigator. The principal investigator will then consult with the safety monitoring board about the SAEs. The board will review and examine the report and send written recommendations made in response to the principal investigator.

### Primary outcome

To evaluate the non-inferiority of the restrictive transfusion strategy to the liberal transfusion strategy, we will assess the 28-day survival rate after arrival at the ED (Tables 2 and 3) as the primary outcome measure. Patients with incomplete information regarding survival/death on the 28th day after arrival at the ED will be defined as drop-out and will be excluded from the primary outcome analysis.

### Secondary outcomes

The secondary outcome measures will be: (1) the time to death during the first 28 days; (2) in-hospital survival rate; (3) cumulative amounts of RBC concentrate, fresh-frozen plasma and platelet cell concentrate transfused during days 1, 7 and 28; (4) ventilator-, catecholamine- and ICU-free days during the first 28 days; (5) frequency of organ failure (renal, hepatic and respiratory) during the first 7 days; (6) rates of each complication (deep venous thrombosis, pulmonary embolism, cerebral infarction, myocardial infarction, bowel ischaemia, transfusion-associated lung injury [TRALI] and sepsis) during the first 28 days; and (7) the Glasgow Outcome Scale at discharge from the hospital (Tables 2 and 3).<sup>13</sup> If the patient dies during the first 28 days after admission to the hospital, each event-free day will be defined as zero. Renal failure is defined as stage III as per the Kidney Disease Improving Global Guidelines.<sup>14</sup> Hepatic failure is defined as a total bilirubin level  $\geq 6$  mg/dL, as per the Sequential Organ Failure Assessment score.<sup>15</sup> Respiratory failure is defined as moderate acute

1  
2  
3 respiratory distress syndrome as per the Berlin definition.<sup>16</sup> Deep venous thrombosis, pulmonary embolism and  
4 cerebral infarction will be diagnosed via clinical imaging, whereas myocardial infarction and bowel ischaemia  
5 will not be diagnosed solely from the elevation of cardiac biomarkers and laboratory data, respectively. TRALI  
6 is defined according to the Toronto definition,<sup>17</sup> and sepsis is defined according to Sepsis-3.<sup>18</sup>  
7  
8  
9  
10  
11  
12

### 13 **Sample size**

14  
15 In our previous retrospective multicentre observational study, wherein data were collected from 796  
16 patients with severe trauma from 15 hospitals during a 1-year period,<sup>19-26</sup> 241 patients received RBC  
17 concentrates during the first 24 hours after arrival at the ED, and 25% of the patients transfused with RBC  
18 concentrates died within 28 days after arrival at the ED. Based on these results, we assumed a mortality rate of  
19 25% at 28 days after arrival in the ED among patients receiving a liberal RBC transfusion strategy. To evaluate  
20 the non-inferiority of the restrictive versus liberal transfusion strategy at 28 days post-arrival at the ED, we set  
21 both the inter-class and inter-period correlation coefficients at 0.05 and the non-inferiority margin at 3%. The  
22 non-inferiority margin was defined based on statistically acceptable tolerance and clinically acceptable margin  
23 referenced previous large clinical trials in the same field.<sup>10 27-30</sup>  
24  
25  
26  
27  
28  
29  
30  
31  
32  
33

34 Assuming that 17 hospitals participate and are randomised as a cluster, the present study would require  
35 the inclusion of 170 patients for each of the transfusion strategies to reach a power of 80% and a one-sided alpha  
36 level of 2.5%, based on a previous study.<sup>31</sup> Therefore, we set the total target sample size for this study at 400  
37 patients, considering a possible variation in the cluster size, the inclusion of non-appropriate patients and  
38 dropouts during follow-up. According to previous studies, this number of patients will allow us to study the  
39 outcomes for 2 years.<sup>19-26</sup>  
40  
41  
42  
43  
44  
45  
46  
47  
48  
49

### 50 **Statistical plan**

51 All analyses of the primary outcome will be adjusted for clustering within sites. The analysis will use  
52 a mixed model with adjustment for intervention, the period as a fixed effect, and the sites and the interaction of  
53 site with period as a random effect.<sup>32</sup> The non-inferiority margin will be set at  $P_0 - P_1 < 0.03$  ( $P_0$ , 28-day survival  
54 rate for liberal transfusion;  $P_1$ , 28-day survival rate for restrictive transfusion). Therefore, we will evaluate  
55  
56  
57  
58  
59  
60

1  
2  
3 whether the lower limit of the 95% confidence interval of  $P_0$ - $P_1$  exceeds the non-inferiority margin (3%) or not.  
4  
5 We will use the full analysis set for our primary outcome analysis after excluding cases with missing primary  
6  
7 outcome values. We will follow the principle of intention-to-treat for the primary analysis and a per-protocol  
8  
9 for sensitivity analysis to ensure that no cases deviate intentionally from the target Hb levels.  
10

11 The secondary outcomes will be analysed as follows. (1) Kaplan–Meier curves with log rank statistics  
12  
13 will be used to assess the survival rate during the first 28 days after arrival at the ED. (2) The number of in-  
14  
15 hospital survival patients will be tabulated. (3) Summary statistics of the cumulative amounts of transfused RBC  
16  
17 concentrate, fresh frozen plasma and platelet cell concentrate during days 1, 7 and 28 after arrival at the ED will  
18  
19 be created using graphs plotted over time. (4) Summary statistics of the event-free days (i.e., ventilator-,  
20  
21 catecholamine- and ICU- free days) will be calculated. (5) The proportions of organ failure and complications  
22  
23 will be calculated. (6) The Glasgow Outcome Scale will be measured at discharge from hospital.  
24  
25

26 Subgroup analyses will be performed to investigate the effects of the interventions on patients  
27  
28 according to sex, age (<60 or  $\geq$ 60 years), Injury Severity Score (<16 or  $\geq$ 16 years), head trauma, and  
29  
30 performance of definitive surgical procedures within 6 hours of arrival at the ED. The results of both unadjusted  
31  
32 and covariate data-adjusted analyses will be assessed. Furthermore, we will perform a post-hoc power analysis  
33  
34 if the numbers of the participating institutions and included patients differ from the planned numbers.  
35  
36  
37  
38

### 39 **Patient and public involvement**

40  
41 No patient is involved.  
42  
43  
44  
45  
46  
47

## 48 **ETHICS AND DISSEMINATION**

### 49 **Ethical approval and consent to participate**

50  
51 The clinical trial will be conducted according to the principles of the Declaration of Helsinki and  
52  
53 Ethical Guidelines for Medical and Health Research Involving Human Subjects published by the Ministry of  
54  
55 Health, Labour and Welfare of Japan and the Japanese Ministry of Education, Culture, Sports, Science and  
56  
57 Technology. Patients or the public were not involved in the design, or conduct, or reporting, or dissemination  
58  
59  
60

1  
2  
3 plans of our trial. The present trial is registered with the UMIN Clinical Trials Registry (identifier:  
4 UMIN000034405) and has been approved by the Ethics Committee of each participating hospital (Table 1) and  
5 the Japanese Association for the Surgery of Trauma (Ethics Committee of the Japanese Association for the  
6 Surgery of Trauma). Written informed consent will be obtained from all patients or their representatives. The  
7 trial information form in Japanese and patient consent forms in Japanese and English were provided as  
8 supplement files (supplementary files 1, 2 and 3).  
9  
10  
11  
12  
13  
14  
15  
16  
17

## 18 **Dissemination**

19  
20 The results of trial will be disseminated to the participating hospitals and board-certified educational  
21 institutions of The Japanese Association for The Surgery of Trauma, submitted to peer-reviewed journals  
22 for publication, and presented at congresses.  
23  
24  
25  
26  
27  
28  
29

## 30 **Expected Outcomes**

31  
32 The RESTRIC trial will compare the outcomes of the restrictive versus liberal RBC transfusion  
33 strategy in trauma patients during the acute post-injury period. To the best of our knowledge, the RESTRIC trial  
34 will be the first to clarify the optimal target Hb levels in patients with severe trauma during this period.  
35  
36  
37

38  
39 Although previous studies, such as the TRICC trial and its post-hoc analysis,<sup>9 10</sup> initiated the study  
40 interventions after admission to the ICU, the RESTRIC trial has been designed to initiate the study interventions  
41 immediately after arrival at ED and to continue these interventions through the early phase of severe trauma. In  
42 patients with severe trauma, management before admission to an ICU is as important as that after admission to  
43 an ICU. If the restrictive RBC transfusion strategy is found to be non-inferior to the liberal RBC transfusion  
44 strategy, the former will be considered advantageous in clinical settings during the acute postinjury period  
45 because it will help reduce the total amount of RBC transfusion. This reduction in RBC transfusion will reduce  
46 (a) the risk of transfusion-related complications such as TRALI, (b) RBC transfusion-related  
47 immunomodulation, and (c) the costs associated with RBC transfusion.<sup>17 33</sup>  
48  
49  
50  
51  
52  
53  
54  
55  
56  
57  
58  
59  
60



## Trial status

At first, the trial protocol ver. 1.3 was approved at 11 October 2018. The latest protocol is ver. 1.7 which have been approved at 19 December 2019 after minor changes (supplementary file 4). In May 2019, 12 participating institutions were randomised as a cluster, and the trial was started. The first patient was included on 11 May 2019. Subsequently, 10 more institutions have joined the trial and have been randomised. The last participating institution began the trial in October 2019. Patients will be recruited until October 2021 and followed up thereafter.

## Authors' contributions

MH conceived and designed the RESTRIC trial and drafted the manuscript. TT drafted the statistical plan. HI calculated the sample size and developed the statistical plan. SK is the principal investigator and supervised the planning of the RESTRIC trial. MH, TT, HI, DK, KS, TO, TY, YK, AE, KI, YM and SK discussed the plan of the RESTRIC trial, revised the manuscript for important intellectual content and read and approved the final manuscript.

## Funding

This study was supported in part by research grants from The General Insurance Association of Japan and The Marumo Emergency Medical Research Promotion Fund.

## Competing Interests

The authors declare that they have no competing interests.

## Acknowledgements

We would like to thank Akiyoshi Hagiwara (Department of Emergency Medicine and Critical Care, National Centre for Global Health and Medicine), Atsushi Shiraishi (Emergency and Trauma Centre, Kameda Medical Centre), Daizoh Saitoh (Division of Traumatology Research Institute, National Defence Medical College),

1  
2  
3 Kazuhisa Yoshiya (Department of Traumatology and Acute Critical Medicine, Osaka University Graduate  
4 School of Medicine) and Shinji Nakahara (Department of Emergency Medicine, Teikyo University School of  
5 Medicine) for supporting the RESTRIC trial. We would also like to thank Editage (<https://online.editage.jp/>)  
6  
7 for English language editing.  
8  
9  
10  
11  
12  
13  
14  
15  
16  
17  
18  
19  
20  
21  
22  
23  
24  
25  
26  
27  
28  
29  
30  
31  
32  
33  
34  
35  
36  
37  
38  
39  
40  
41  
42  
43  
44  
45  
46  
47  
48  
49  
50  
51  
52  
53  
54  
55  
56  
57  
58  
59  
60

For peer review only

## References

1. Borgman MA, Spinella PC, Perkins JG, *et al.* The ratio of blood products transfused affects mortality in patients receiving massive transfusions at a combat support hospital. *The Journal of trauma* 2007;63:805-13.
2. Shaz BH, Dente CJ, Nicholas J, *et al.* Increased number of coagulation products in relationship to red blood cell products transfused improves mortality in trauma patients. *Transfusion* 2010;50:493-500.
3. Cotton BA, Reddy N, Hatch QM, *et al.* Damage control resuscitation is associated with a reduction in resuscitation volumes and improvement in survival in 390 damage control laparotomy patients. *Annals of surgery* 2011;254:598-605.
4. Holcomb JB, del Junco DJ, Fox EE, *et al.* The prospective, observational, multicenter, major trauma transfusion (PROMMTT) study: comparative effectiveness of a time-varying treatment with competing risks. *JAMA Surg* 2013;148:127-36.
5. Johansson PI, Sorensen AM, Larsen CF, *et al.* Low hemorrhage-related mortality in trauma patients in a Level I trauma center employing transfusion packages and early thromboelastography-directed hemostatic resuscitation with plasma and platelets. *Transfusion* 2013;53:3088-99.
6. Langan NR, Eckert M, Martin MJ. Changing patterns of in-hospital deaths following implementation of damage control resuscitation practices in US forward military treatment facilities. *JAMA Surg* 2014;149:904-12.
7. Holcomb JB, Tilley BC, Baraniuk S, *et al.* Transfusion of plasma, platelets, and red blood cells in a 1:1:1 vs a 1:1:2 ratio and mortality in patients with severe trauma: the PROPPR randomized clinical trial. *Jama* 2015;313:471-82.
8. Rossaint R, Bouillon B, Cerny V, *et al.* The European guideline on management of major bleeding and coagulopathy following trauma: fourth edition. *Critical care* 2016;20:100.
9. McIntyre L, Hebert PC, Wells G, *et al.* Is a restrictive transfusion strategy safe for resuscitated and critically ill trauma patients? *The Journal of trauma* 2004;57:563-8; discussion 68.
10. Hebert PC, Wells G, Blajchman MA, *et al.* A multicenter, randomized, controlled clinical trial of transfusion requirements in critical care. Transfusion Requirements in Critical Care Investigators,

- 1  
2  
3 Canadian Critical Care Trials Group. *The New England journal of medicine* 1999;340:409-17.  
4  
5 11. Sena MJ, Rivers RM, Muizelaar JP, *et al.* Transfusion practices for acute traumatic brain injury: a  
6 survey of physicians at US trauma centers. *Intensive care medicine* 2009;35:480-8.  
7  
8 12. Robertson CS, Hannay HJ, Yamal JM, *et al.* Effect of erythropoietin and transfusion threshold on  
9 neurological recovery after traumatic brain injury: a randomized clinical trial. *Jama* 2014;312:36-47.  
10  
11 13. Jennett B, Bond M. Assessment of outcome after severe brain damage. *Lancet* 1975;1:480-4.  
12  
13 14. Khwaja A. KDIGO clinical practice guidelines for acute kidney injury. *Nephron Clinical practice*  
14 2012;120:c179-84.  
15  
16 15. Vincent JL, de Mendonca A, Cantraine F, *et al.* Use of the SOFA score to assess the incidence of organ  
17 dysfunction/failure in intensive care units: results of a multicenter, prospective study. Working group  
18 on "sepsis-related problems" of the European Society of Intensive Care Medicine. *Critical care*  
19 *medicine* 1998;26:1793-800.  
20  
21 16. Force ADT, Ranieri VM, Rubenfeld GD, *et al.* Acute respiratory distress syndrome: the Berlin  
22 Definition. *Jama* 2012;307:2526-33.  
23  
24 17. Kleinman S, Caulfield T, Chan P, *et al.* Toward an understanding of transfusion-related acute lung  
25 injury: statement of a consensus panel. *Transfusion* 2004;44:1774-89.  
26  
27 18. Shankar-Hari M, Phillips GS, Levy ML, *et al.* Developing a New Definition and Assessing New  
28 Clinical Criteria for Septic Shock: For the Third International Consensus Definitions for Sepsis and  
29 Septic Shock (Sepsis-3). *Jama* 2016;315:775-87.  
30  
31 19. Shiraishi A, Kushimoto S, Otomo Y, *et al.* Effectiveness of early administration of tranexamic acid in  
32 patients with severe trauma. *The British journal of surgery* 2017;104:710-17.  
33  
34 20. Nakamura Y, Ishikura H, Kushimoto S, *et al.* Fibrinogen level on admission is a predictor for massive  
35 transfusion in patients with severe blunt trauma: Analyses of a retrospective multicentre observational  
36 study. *Injury* 2017;48:674-79.  
37  
38 21. Kudo D, Kushimoto S, Shiraishi A, *et al.* The impact of preinjury antithrombotic medication on  
39 hemostatic interventions in trauma patients. *The American journal of emergency medicine* 2017;35:62-  
40 65.  
41  
42  
43  
44  
45  
46  
47  
48  
49  
50  
51  
52  
53  
54  
55  
56  
57  
58  
59  
60

- 1  
2  
3 22. Hayakawa M, Maekawa K, Kushimoto S, *et al.* Hyperfibrinolysis in severe isolated traumatic brain  
4 injury may occur without tissue hypoperfusion: a retrospective observational multicentre study. *Critical*  
5 *care* 2017;21:222.  
6  
7  
8  
9 23. Hayakawa M, Kushimoto S, Watanabe E, *et al.* Pharmacokinetics of recombinant human soluble  
10 thrombomodulin in disseminated intravascular coagulation patients with acute renal dysfunction.  
11 *Thrombosis and haemostasis* 2017;117:851-59.  
12  
13  
14  
15 24. Hayakawa M, Maekawa K, Kushimoto S, *et al.* High D-Dimer Levels Predict a Poor Outcome in  
16 Patients with Severe Trauma, Even with High Fibrinogen Levels on Arrival: A Multicenter  
17 Retrospective Study. *Shock* 2016;45:308-14.  
18  
19  
20  
21 25. Hagiwara A, Kushimoto S, Kato H, *et al.* Can Early Aggressive Administration of Fresh Frozen Plasma  
22 Improve Outcomes in Patients with Severe Blunt Trauma?--A Report by the Japanese Association for  
23 the Surgery of Trauma. *Shock* 2016;45:495-501.  
24  
25  
26  
27 26. Endo A, Shiraishi A, Otomo Y, *et al.* Development of Novel Criteria of the "Lethal Triad" as an  
28 Indicator of Decision Making in Current Trauma Care: A Retrospective Multicenter Observational  
29 Study in Japan. *Critical care medicine* 2016;44:e797-803.  
30  
31  
32  
33 27. Hébert PC, Wells G, Blajchman MA, *et al.* A multicenter, randomized, controlled clinical trial of  
34 transfusion requirements in critical care. Transfusion Requirements in Critical Care Investigators,  
35 Canadian Critical Care Trials Group. *The New England journal of medicine* 1999;340:409-17.  
36  
37  
38  
39 28. Villanueva C, Colomo A, Bosch A, *et al.* Transfusion strategies for acute upper gastrointestinal bleeding.  
40 *The New England journal of medicine* 2013;368:11-21.  
41  
42  
43  
44 29. Hajjar LA, Vincent JL, Galas FR, *et al.* Transfusion requirements after cardiac surgery: the TRACS  
45 randomized controlled trial. *Jama* 2010;304:1559-67.  
46  
47  
48  
49 30. Mazer CD, Whitlock RP, Fergusson DA, *et al.* Restrictive or Liberal Red-Cell Transfusion for Cardiac  
50 Surgery. *The New England journal of medicine* 2017;377:2133-44.  
51  
52  
53  
54 31. Giraudeau B, Ravaud P, Donner A. Sample size calculation for cluster randomized cross-over trials.  
55 *Stat Med* 2008;27:5578-85.  
56  
57  
58 32. Morgan KE, Forbes AB, Keogh RH, *et al.* Choosing appropriate analysis methods for cluster  
59  
60

1  
2  
3 randomised cross-over trials with a binary outcome. *Stat Med* 2017;36:318-33.  
4

- 5 33. Remy KE, Hall MW, Cholette J, *et al.* Mechanisms of red blood cell transfusion-related  
6 immunomodulation. *Transfusion* 2018;58:804-15.  
7  
8  
9

10  
11  
12  
13  
14  
15  
16  
17  
18  
19  
20  
21  
22  
23  
24  
25  
26  
27  
28  
29  
30  
31  
32  
33  
34  
35  
36  
37  
38  
39  
40  
41  
42  
43  
44  
45  
46  
47  
48  
49  
50  
51  
52  
53  
54  
55  
56  
57  
58  
59  
60

For peer review only

1  
2  
3 **Figure Legends**  
4

5 **Figure 1. Flowchart of the randomisation and crossover of the participating hospitals.**  
6

7 Hb, Haemoglobin  
8  
9

10  
11 **Figure 2. Flowchart of the patient enrolment process**  
12  
13  
14  
15  
16  
17  
18  
19  
20  
21  
22  
23  
24  
25  
26  
27  
28  
29  
30  
31  
32  
33  
34  
35  
36  
37  
38  
39  
40  
41  
42  
43  
44  
45  
46  
47  
48  
49  
50  
51  
52  
53  
54  
55  
56  
57  
58  
59  
60

For peer review only

Table 1. List of participating hospitals and ethics committee

| Participating hospitals                                                           | Ethics committees                                                                                                                             |
|-----------------------------------------------------------------------------------|-----------------------------------------------------------------------------------------------------------------------------------------------|
| Principal institution                                                             |                                                                                                                                               |
| Department of Emergency and Critical Care Medicine,<br>Tohoku University Hospital | Ethics Committee Tohoku University Graduate School of<br>Medicine                                                                             |
| Project management                                                                |                                                                                                                                               |
| Department of Emergency Medicine, Hokkaido University<br>Hospital                 | The Institutional Review Board of Hokkaido University<br>Hospital                                                                             |
| Other participating institutions                                                  |                                                                                                                                               |
| Advanced Critical Care and Emergency Centre, Okayama<br>University Hospital       | Okayama University Graduate School of Medicine, Dentistry<br>and Pharmaceutical Sciences and Okayama University<br>Hospital, Ethics Committee |
| Advanced Critical Care Centre, Gifu University Hospital                           | Medical Review Board of Gifu University Graduate School of<br>Medicine                                                                        |
| Advanced Emergency and Critical Care Centre, Saitama<br>Red Cross Hospital        | Hospital ethical committee of Saitama Red Cross                                                                                               |
| Advanced Trauma, Emergency and Critical Care Centre,<br>Oita University Hospital  | The Institutional Review Board of Interventional Clinical<br>Research of Oita University Hospital                                             |
| Department of Emergency Medicine, Gunma University<br>Graduate School of Medicine | Institutional Review Board of Gunma University Hospital                                                                                       |
| Department of Acute Care Surgery, Shimane University<br>Faculty of Medicine       | The Shimane University Institutional Committee on Ethics                                                                                      |



1 Department of Emergency and Critical Care Medicine,  
2 Chiba University Graduate School of Medicine

CHIBA UNIVERSITY Certified Clinical Research Review  
Board

3 Department of Emergency and Critical Care Medicine,  
4 Fukuoka University Hospital

Institutional Review Board of Fukuoka University Hospital

5 Department of Emergency and Critical Care Medicine,  
6 Japan Red Cross Maebashi Hospital

Research Review Board of Japan Red Cross Maebashi Hospital

7 Department of Emergency and Critical Care Medicine,  
8 Juntendo University Urayasu Hospital

The Ethics Committee of the Juntendo University Urayasu  
Hospital

9 Department of Emergency and Critical Care Medicine,  
10 Nippon Medical School

Ethics Committee of Nippon Medical School Hospital

11 Department of Emergency and Critical Care Medicine,  
12 Nippon Medical School Tama Nagayama Hospital

Ethics Committee of Nippon Medical School Tamanagayama  
Hospital

13 Department of Emergency and Critical Care Medicine,  
14 Tokyo Saiseikai Central Hospital

Research Ethics Committee, Tokyo Saiseikai Central Hospital

15 Department of Emergency and Critical Care Medicine,  
16 Wakayama Medical University

The Ethical Review Board of Wakayama Medical University

17 Department of Emergency Medicine, Division of Acute Care  
18 Surgery, Teikyo University School of Medicine

Teikyo University Institutional Review Board

19 Emergency and Critical Care Centre, Kochi Health Sciences  
20 Centre

Institutional Review Board, Kochi Health Sciences Center

21 Senri Critical Care Medical Centre, Saiseikai Senri  
22 Hospital

Ethical committee Saiseikai Senri Hospital

1  
2 Senshu Trauma and Critical Care Centre, Rinku General  
3 Medical Centre

Ethics Committee for Clinical Research, Rinku General Medical  
Center

4  
5 Shock and Trauma Centre, Nippon Medical School Chiba  
6 Hokusoh Hospital

The ethical review board of Nippon Medical School Chiba  
Hokusoh Hospital

7  
8 Trauma and Acute Critical Care Centre, Tokyo Medical and  
9 Dental University Hospital of Medicine

Medical Research Institute Tokyo Medical and Dental  
University

---

10  
11  
12  
13  
14  
15  
16  
17  
18  
19  
20  
21  
22  
23  
24  
25  
26  
27  
28  
29  
30  
31  
32  
33  
34  
35  
36  
37  
38  
39  
40  
41  
42  
43  
44  
45  
46

For peer review only

Table 2. Schedule of assessments

|                                                           | Arrival<br>at ED | 6 hr | 12 hr | 24 hr | 48 hr | Day 7 | Discharge<br>from ICU | Discharge<br>from hospital | Day 28 |
|-----------------------------------------------------------|------------------|------|-------|-------|-------|-------|-----------------------|----------------------------|--------|
| Informed consent                                          | ○                |      |       |       |       |       |                       |                            |        |
| Check inclusion/exclusion criteria                        | ○                |      |       |       |       |       |                       |                            |        |
| Patient assesment                                         | ○                |      |       |       |       |       |                       |                            |        |
| Physiologic severity                                      | ○                |      |       |       |       |       |                       |                            |        |
| Abbreviated Injury Scale                                  | ○                |      |       |       |       |       |                       |                            |        |
| Surgical intervention and IVR                             | -----○-----      |      |       |       |       |       |                       |                            |        |
| Laboratory data                                           | ○                |      |       |       |       |       |                       |                            |        |
| Haemoglobin level                                         | -----○-----      |      |       |       |       |       |                       |                            |        |
| Cumulative amount of transfusion                          |                  | ○    | ○     | ○     | ○     | ○     |                       |                            | ○      |
| Organ failure<br>(renal/respiratory/hepatic)              | -----○-----      |      |       |       |       |       |                       |                            |        |
| TRALI                                                     | -----○-----      |      |       |       |       |       |                       |                            |        |
| Complications                                             | -----○-----      |      |       |       |       |       |                       |                            |        |
| Mortality                                                 |                  |      |       |       |       |       | ○                     | ○                          | ○      |
| Discharge destination                                     |                  |      |       |       |       |       |                       | ○                          |        |
| Glasgow outcome scale                                     |                  |      |       |       |       |       |                       | ○                          |        |
| Event-free days (free of<br>ventilator/catecholamine/ICU) |                  |      |       |       |       |       |                       |                            | ○      |

1  
2  
3  
4  
5  
6  
7  
8  
9  
10  
11  
12  
13  
14  
15  
16  
17  
18  
19  
20  
21  
22  
23  
24  
25  
26  
27  
28  
29  
30  
31  
32  
33  
34  
35  
36  
37  
38  
39  
40  
41  
42  
43  
44  
45  
46

---

Complications include deep venous thrombosis, pulmonary embolism, acute myocardial infarction, ischaemic bowel necrosis and sepsis.  
IVR, interventional radiology; TRALI, transfusion-related acute lung injury; ICU, intensive care unit

For peer review only

Table 3. Primary and secondary outcomes

| Outcome                                                          | Definition/annotation                                                                                                                                                    |
|------------------------------------------------------------------|--------------------------------------------------------------------------------------------------------------------------------------------------------------------------|
| Primary outcome                                                  |                                                                                                                                                                          |
| 28-day survival rate after arrival at the ED                     | Patients whose survival/death information on 28th day after arrival at the ED is unclear are defined as drop-outs and will be excluded from the primary outcome analysis |
| Secondary outcome                                                |                                                                                                                                                                          |
| Time to death during the first 28 days after arrival at the ED   |                                                                                                                                                                          |
| In-hospital survival rate                                        |                                                                                                                                                                          |
| Cumulative transfusion amounts                                   |                                                                                                                                                                          |
| Red blood cell concentrate                                       | Cumulative amounts during the first 1, 7, and 28 days after arrival at the ED                                                                                            |
| Fresh-frozen plasma                                              | Cumulative amounts during the first 1, 7, and 28 days after arrival at the ED                                                                                            |
| Platelet concentrate                                             | Cumulative amounts during the first 1, 7, and 28 days after arrival at the ED                                                                                            |
| Event-free days during the first 28 days after arrival at the ED |                                                                                                                                                                          |
| Ventilator-free days                                             | When the patient dies during the first 28 days after the arrival at ED, the free days are defined as zero.                                                               |
| Catecholamine-free days                                          | When the patient dies during the first 28 days after the arrival at ED, the free days are defined as zero.                                                               |
| ICU-free days                                                    | When the patient dies during the first 28 days after the arrival at ED, the free days are defined as zero.                                                               |
| Organ failure during the first 7-days after arrival at the ED    |                                                                                                                                                                          |
| Renal failure                                                    | Stage III defined by the Kidney Disease Improving Global Guidelines                                                                                                      |

|    |                                                                                    |                                                                                |
|----|------------------------------------------------------------------------------------|--------------------------------------------------------------------------------|
| 1  |                                                                                    |                                                                                |
| 2  |                                                                                    | Total bilirubin level $\geq 6$ mg/dL as per the Sequential Organ Failure       |
| 3  | Hepatic failure                                                                    |                                                                                |
| 4  |                                                                                    | Assessment score                                                               |
| 5  |                                                                                    |                                                                                |
| 6  | Respiratory failure                                                                | Moderate acute respiratory distress syndrome according to the Berlin           |
| 7  |                                                                                    | definition                                                                     |
| 8  |                                                                                    |                                                                                |
| 9  | Complications during in-hospital stay or the first 28 days after arrival at the ED |                                                                                |
| 10 |                                                                                    |                                                                                |
| 11 | Deep venous thrombosis                                                             | Presence or absence should be diagnosed using clinical imaging                 |
| 12 | Pulmonary embolism                                                                 | Presence or absence should be diagnosed using clinical imaging                 |
| 13 | Cerebral infarction                                                                | Presence or absence should be diagnosed using clinical imaging                 |
| 14 |                                                                                    |                                                                                |
| 15 | Acute myocardial infarction                                                        | Presence or absence should not be diagnosed using only an elevation of cardiac |
| 16 |                                                                                    | biomarkers                                                                     |
| 17 | Bowel ischaemia                                                                    | Presence or absence should not be diagnosed using laboratory data              |
| 18 |                                                                                    |                                                                                |
| 19 | Transfusion-associated lung injury                                                 | Presence, possibility or absence are defined using the Toronto definition      |
| 20 |                                                                                    |                                                                                |
| 21 | Sepsis                                                                             | Presence or absence should be diagnosed using the Sepsis-3 definition          |
| 22 |                                                                                    |                                                                                |
| 23 | Glasgow outcome scale score at discharge from                                      | Good recovery, moderate disability, severe disability, persistent vegetative   |
| 24 | the hospital                                                                       | state or death                                                                 |
| 25 |                                                                                    |                                                                                |
| 26 |                                                                                    |                                                                                |
| 27 |                                                                                    |                                                                                |
| 28 |                                                                                    |                                                                                |
| 29 |                                                                                    |                                                                                |
| 30 |                                                                                    |                                                                                |
| 31 |                                                                                    |                                                                                |
| 32 |                                                                                    |                                                                                |
| 33 |                                                                                    |                                                                                |
| 34 |                                                                                    |                                                                                |
| 35 |                                                                                    |                                                                                |
| 36 |                                                                                    |                                                                                |
| 37 |                                                                                    |                                                                                |
| 38 |                                                                                    |                                                                                |
| 39 |                                                                                    |                                                                                |
| 40 |                                                                                    |                                                                                |
| 41 |                                                                                    |                                                                                |
| 42 |                                                                                    |                                                                                |
| 43 |                                                                                    |                                                                                |
| 44 |                                                                                    |                                                                                |
| 45 |                                                                                    |                                                                                |
| 46 |                                                                                    |                                                                                |

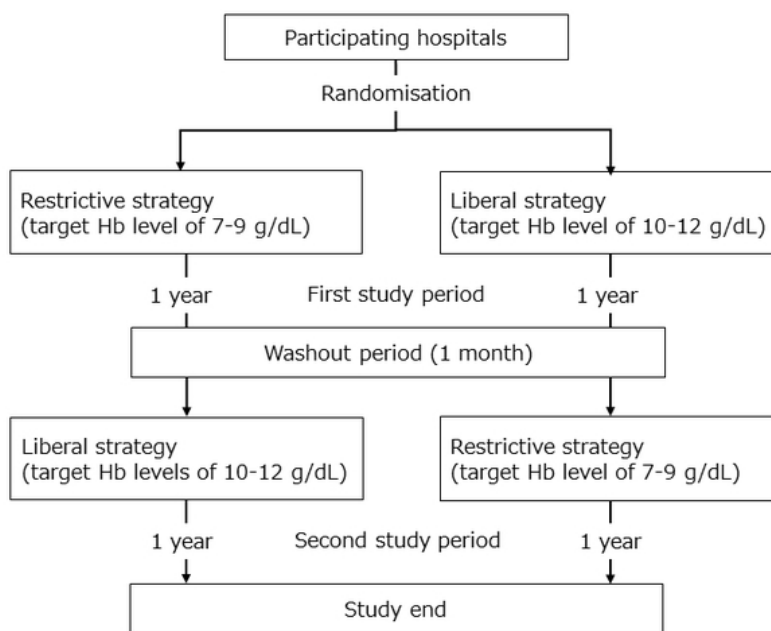

Figure 1

Figure 1. Flowchart of the randomisation and crossover of the participating hospitals.  
Hb, Haemoglobin

52x75mm (300 x 300 DPI)

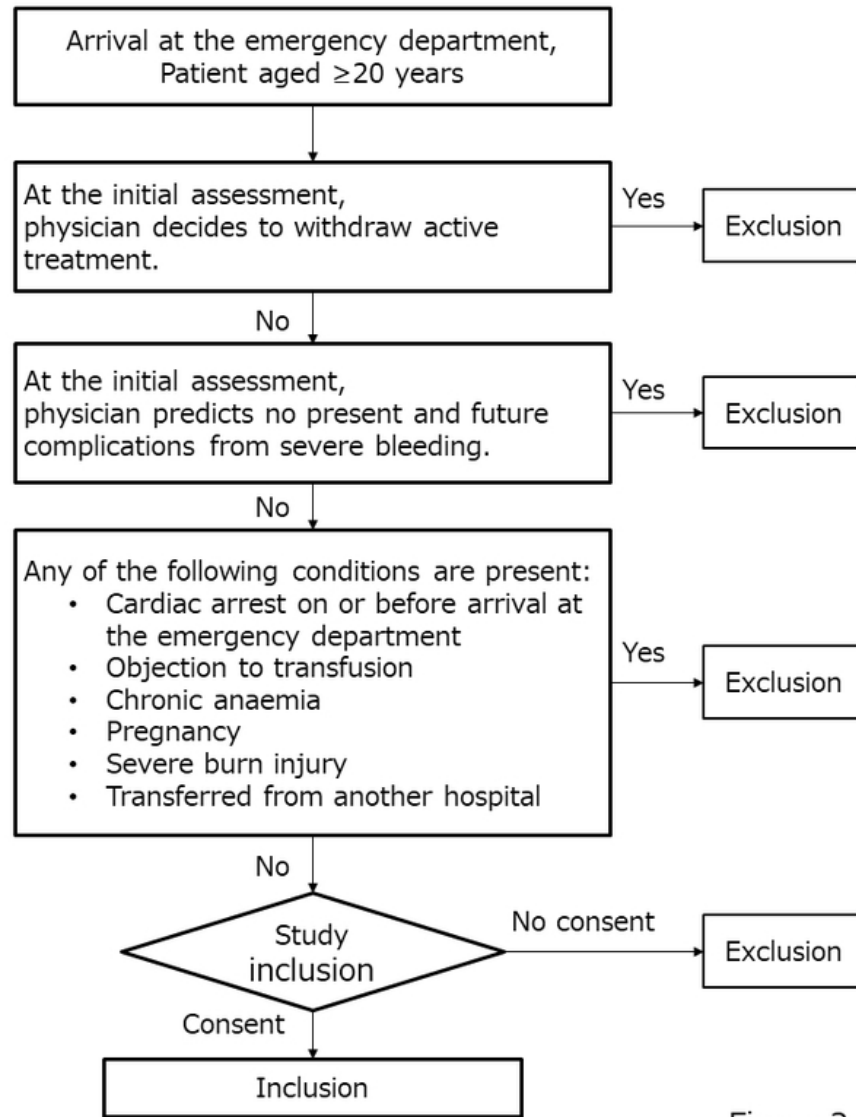

Figure 2

Figure 2. Flowchart of the patient enrolment process

52x69mm (300 x 300 DPI)



第3版 2019年5月21日

**第Ⅱ種**

患者さんへ

「重症外傷患者に対する制限輸血戦略

クラスターランダム化

クロスオーバー非劣性試験」へのご協力をお願い

1  
2  
3  
4  
5  
6  
7  
8  
9  
10  
11  
12  
13  
14  
15  
16  
17  
18  
19  
20  
21  
22  
23  
24  
25  
26  
27  
28  
29  
30  
31  
32  
33  
34  
35  
36  
37  
38  
39  
40  
41  
42  
43  
44  
45  
46  
47  
48  
49  
50  
51  
52  
53  
54  
55  
56  
57  
58  
59  
60

研究計画書番号： 2018-2-275

倫理委員会承認日：2019年2月20日

作成日： 2018年 12月 6日 (第1版)  
2019年 2月 16日 (第2版)  
2019年 5月 21日 (第3版)

For peer review only

1  
2  
3  
4 東北大学病院は、「診療」を行う医療機関であると共に、医学の「研究」及び「教育」機関でもありま  
5  
6  
7 す。その役割の一つに、安全で有効な新しい治療法の開発があり、他の大学や医療機関、企業等と連携  
8  
9  
10 し、医薬品や医療機器などの研究開発を行っています。

11  
12  
13 そして、東北大学病院では、個人情報保護体制のもと、研究の関係者が、皆様の診療に関する記録（カ  
14  
15 ルテ、血液検査データ、尿検査データなど）の確認を行う場合があります。しかし、これらの関係者には  
16  
17 守秘義務が課せられていますので、皆様の名前などの個人情報にかかわる情報は責任をもってお守りいた  
18  
19  
20  
21 します。

22  
23  
24 東北大学病院における医薬品や医療機器などの研究開発は、先進的な医療の創出、医療の質の向上に欠  
25  
26  
27 かすことの出来ない取り組みです。地域の中核的医療機関として、高度医療を提供する役割を果たすた  
28  
29  
30 め、皆様のご理解とご協力をお願いいたします。

## 目次

|    |     |                                         |
|----|-----|-----------------------------------------|
| 1  |     |                                         |
| 2  |     |                                         |
| 3  |     |                                         |
| 4  | 1.  | 医学系研究について .....5                        |
| 5  |     |                                         |
| 6  |     |                                         |
| 7  | 2.  | この研究の背景について.....5                       |
| 8  |     |                                         |
| 9  |     |                                         |
| 10 | 3.  | 赤血球輸血について .....6                        |
| 11 |     |                                         |
| 12 |     |                                         |
| 13 | 4.  | 研究の内容・期間について.....7                      |
| 14 |     |                                         |
| 15 |     |                                         |
| 16 | 5.  | この研究に参加しない場合の他の治療方法について..... 13         |
| 17 |     |                                         |
| 18 | 6.  | 研究への参加の自由と同意撤回の自由について..... 13           |
| 19 |     |                                         |
| 20 |     |                                         |
| 21 | 7.  | 個人情報の保護・研究結果の取扱いについて ..... 14           |
| 22 |     |                                         |
| 23 |     |                                         |
| 24 | 8.  | 研究資金と利益相反（企業等との利害関係）について ..... 14       |
| 25 |     |                                         |
| 26 |     |                                         |
| 27 | 9.  | この研究により健康被害が発生した場合の対応について ..... 15      |
| 28 |     |                                         |
| 29 |     |                                         |
| 30 | 10. | 研究への参加が中止となる場合について ..... 16             |
| 31 |     |                                         |
| 32 |     |                                         |
| 33 | 11. | 将来の研究のために用いる可能性／他の研究機関に提供する可能性 ..... 16 |
| 34 |     |                                         |
| 35 | 12. | 研究に関する費用について..... 17                    |
| 36 |     |                                         |
| 37 |     |                                         |
| 38 | 13. | あなたに守っていただきたい事項について ..... 17            |
| 39 |     |                                         |
| 40 |     |                                         |
| 41 | 14. | 研究に関する情報公開の方法..... 18                   |
| 42 |     |                                         |
| 43 | 15. | 相談窓口 ..... 18                           |
| 44 |     |                                         |
| 45 |     |                                         |
| 46 |     |                                         |
| 47 |     |                                         |
| 48 |     |                                         |
| 49 |     |                                         |
| 50 |     |                                         |
| 51 |     |                                         |
| 52 |     |                                         |
| 53 |     |                                         |
| 54 |     |                                         |
| 55 |     |                                         |
| 56 |     |                                         |
| 57 |     |                                         |
| 58 |     |                                         |
| 59 |     |                                         |
| 60 |     |                                         |

## 1. 医学系研究について

この研究は研究責任者が企画し実施する「医学系研究」といいます。「医学系研究」とは患者さんに参加・協力していただき、新しい治療法や診断法が「病気に対してどれだけ効くか（効果）」と「どのような種類の副作用や不具合が、どの位の割合で起こるのか（安全性）」を詳しく調べる研究のことです。また、この時に使われる医薬品／医療機器を「試験薬／試験機器」といいます。

これから説明する医学系研究は、参加される患者さんが不利益を受けないよう、倫理委員会※（医学系研究について審査する委員会）により十分検討されて承認され、研究機関の長により実施が許可されています。

※倫理委員会：

患者さんの安全を守る立場から、研究の実施や継続について、専門家や専門外の方々により科学的および倫理的観点から審議を行い、研究機関の長に意見を述べる委員会です。倫理委員会の手順書、委員名簿、委員会の議事要旨等の情報は下記のホームページに掲載されていますのでご参照ください。

- ・ 名称：東北大学病院臨床研究倫理委員会
- ・ 設置者：国立大学法人東北大学 東北大学病院長
- ・ 所在地：宮城県仙台市青葉区星陵町1-1
- ・ ホームページアドレス：<https://www.rinri.med.tohoku.ac.jp/portal/>

## 2. この研究の背景について

あなたは、重症の外傷(怪我)のため救急搬入となりました。現在、もしくは今後の出血に対し、赤血球輸血が必要と考えられる状況です。出血により貧血が進行すると、体の各所に酸素を十分に運搬することが出来なくなります。このため、必要に応じて赤血球輸血を行っています。しかし、どの程度の貧血(へ

1 モグロビン値の低下)のときに目標をどのようにして輸血を行うのが良いのか分かっていません。

2  
3  
4 これまで明確な根拠はなく、慣習的にヘモグロビン値で10g/dL以上を目標に輸血を行ってしま  
5  
6  
7 が、近年、集中治療が必要な患者さんでは7 g/dL以上を目標でも良いのではないかとの報告が出てきて  
8  
9  
10 います。ただし、外傷の患者さんに関しては明確な報告はなく、施設や個々の医師の裁量で、7~12 g/  
11  
12 dL程度のヘモグロビン値を目標として対応しているのが現状です。当院でも、個々の担当医師の裁量  
13  
14  
15 で、7~12 g/dL程度のヘモグロビン値を目標として対応していました。

16  
17  
18 赤血球輸血は他人の血液を体に入れる治療のため、悪影響が出る可能性があります。しかし、赤血球が  
19  
20  
21 不足すると全身の大切な臓器への酸素の運搬が不十分となる可能性があります。重症の外傷（怪我）の場  
22  
23  
24 合も、身体にとってちょうど良い量の赤血球輸血が望ましいですが、現在そのちょうど良い量がわかって  
25  
26  
27 いません。

28  
29  
30 現在、東北大学病院救急科も参加する多施設共同研究では、重症の外傷（怪我）にとってちょうど良い  
31  
32  
33 量（効果が大きく、害が最小限）の赤血球輸血量を明らかにしようとしています。

### 3. 赤血球輸血について

34  
35  
36  
37  
38  
39  
40  
41  
42  
43  
44 赤血球は、肺から取り込まれた酸素を身体の隅々まで運ぶ役割をしています。赤血球が不足した状態を  
45  
46  
47 貧血とよび、脳や心臓など臓器の酸素が不足すると、生命に危険が及びことがあります。外傷では出血  
48  
49  
50 などが原因で貧血になる患者さんがたくさんいます。身体の中で不足した赤血球を補うために赤血球輸  
51  
52  
53 血を行います。輸血による副作用・合併症としては、アレルギーのような反応、感染症、肺障害などが  
54  
55  
56 あります。詳細は、輸血に関する説明書をご覧ください。

## 4. 研究の内容・期間について

### 1) 研究の目的について

この研究は、重症外傷患者さんにおける、輸血の目標とするヘモグロビン値の影響を検証することを目的としています。本研究を実施することで、ヘモグロビン値の目標が高い方が良いのか、低い方が良いのかが明らかになります。

多施設共同研究の統括施設は、東北大学病院高度救命救急センターです。

研究に参加される患者さんから血液検査を行います。通常の診療で調べる範囲の項目のみを検査します。それらの値と診療内容や経過の情報（5）研究の方法および観察・検査スケジュールなど、に記載）は、重症外傷における、輸血の目標とするヘモグロビン値の目標が高い方が良いのか、低い方が良いのかを解析するために用います。

### 2) 用語の説明

「クラスターランダム化」とは、個人の患者さんではなく、地域や施設など一つのまとまり(クラスター)として、無作為割付(Randomization)を実施する試験デザインです。

「クロスオーバー試験」とは、A群とB群を設定し、第1クールではA群に①を実施、B群に②を実施する。次の第二クールではA群に②を実施、B群に①を実施する。このように順次入れ替えていく試験デザインです。「非劣性試験」とは、①と②を比較する際に、主な臨床的な効果が、①が②よりもある許容限界以上に劣らないことを示すことを主要な目的とした試験デザインです。

### 3) 研究への参加基準（候補として選ばれた理由）

研究に参加いただけるのは、以下の項目にあてはまる方です。しかし、同意いただいた後でも検査の結果によっては、参加いただけない場合もありますのでご了承ください。

以下の項目に該当する方がこの研究に参加いただけます。

(1) 外傷と診断されている方

(2) 下記の項目のいずれかを満たしている方

① 重篤な出血がある

② 今後重篤な出血を起こす恐れがある

(3) 年齢 20歳以上

(4) 性別 男女問わない

(5) 研究参加について本人及びご家族など代諾者から文書で同意が得られる方（この研究では上記の患者さんが対象となるため、ご自身で十分な理解の上同意をしていただくことが難しい患者さんを対象に含めるため、ご家族など代諾者から文書で同意が得られる方も対象とします）

また、以下の項目に該当する方はこの治療に参加いただけないことになっています。

(1) 妊娠中、授乳中、研究期間中に妊娠を希望する方

(2) 他の病院を受診した後に東北大学病院へ転院となった方

(3) 初期診療時に積極的な加療を望まなかった方

(4) 大きな熱傷（やけど、熱傷面積15%以上）を伴っている方

(5) 慢性貧血（外傷を受ける前から貧血）でもととのヘモグロビン値が7mg/dL以下の方

(6) 輸血を拒否される方

(7) 他の研究に参加中の方

(8) 担当医師が本研究の対象として好ましくないと判断した方

### 3) 参加予定期間



この研究にご協力いただくために必要な期間は、同意をいただいた後、28日間（4週間）となります。

それ以前に、転院/退院された場合には、電話等で状況をお問い合わせさせて頂く場合があります。

#### 4) 実施予定期間と参加予定者数

この研究は、平成30年7月から平成34年12月まで行われ、ヘモグロビン値7~9 g/dLを目標群200名、ヘモグロビン値10~12 g/dLを目標群200名、合計400名の患者さんの参加を予定しています。当院では各群15名、合計30名の患者さんの参加を予定しております。

#### 5) 研究の方法および観察・検査スケジュールなど

この研究に参加している施設では、予め、ヘモグロビン値7~9g/dLを目標として赤血球輸血を実施するか、ヘモグロビン値10~12 g/dLを目標として赤血球輸血を実施するかが決められています。

（クラスターランダム化の結果により施設毎に①、②いずれかを使用する）

① 現在を含めた1年間、我々の施設ではヘモグロビン値7~9g/dLを目標として赤血球輸血を実施しています。別の時期には、ヘモグロビン値10~12 g/dLを目標として赤血球輸血を実施します（していません）。この目標ヘモグロビン値の設定は、この研究のために設定されたものです。

② 現在を含めた1年間、我々の施設ではヘモグロビン値10~12 g/dLを目標として赤血球輸血を実施しています。別の時期には、ヘモグロビン値7~9g/dLを目標として赤血球輸血を実施します（していません）。この目標ヘモグロビン値の設定は、この研究のために設定されたものです。

このヘモグロビン値を目標とするのは、搬入後7日間（もしくは集中治療室から退室まで）です。

#### 検査および観察項目

治療前および治療中、終了後には以下の患者さんの観察、診察および検査を実施し、この研究のデータ

として活用します。ただし、研究参加に伴い、通常の診療を超えて追加される検査や処置はありません。

① 患者さんの背景情報

(搬入日、年齢、性別、受傷から病着までの時間、共存症、外傷の重症度)

② 腹部超音波検査、1 L輸液後の収縮期血圧、骨盤骨折の分類

③ 血液検査 (ヘモグロビン、血小板数、PT-INR、フィブリノゲン、乳酸値)

④ 輸血量、手術の有無、

⑤ 臓器不全の有無、合併症の有無、生死

⑥ 人工呼吸器や透析、カテコラミンを使用しなかった日数

⑦ 退院日、退院後の転出先、退院時の意識状態

|                              |     | 観察期間 (28日もしくは退院まで) |      |      |      |    |     |     |
|------------------------------|-----|--------------------|------|------|------|----|-----|-----|
| 評価時期                         | 搬入時 | 6時間                | 12時間 | 24時間 | 48時間 | 7日 | 退院時 | 28日 |
| 同意                           | ○   |                    |      |      |      |    |     |     |
| 患者基本情報                       | ○   |                    |      |      |      |    |     |     |
| 来院時病態                        | ○   |                    |      |      |      |    |     |     |
| 検査と処置                        | ←○→ |                    |      |      |      |    |     |     |
| 損傷と重症度                       | ○   |                    |      |      |      |    |     |     |
| 腹部超音波検査、1 L輸液後の収縮期血圧、骨盤骨折の分類 | ○   |                    |      |      |      |    |     |     |
| 搬入時検査                        | ○   |                    |      |      |      |    |     |     |

|                                                                                                                                                                                                                                                                                                                                                             |                           |     |   |   |   |   |   |   |  |
|-------------------------------------------------------------------------------------------------------------------------------------------------------------------------------------------------------------------------------------------------------------------------------------------------------------------------------------------------------------|---------------------------|-----|---|---|---|---|---|---|--|
| 1<br>2<br>3<br>4<br>5<br>6<br>7<br>8<br>9<br>10<br>11<br>12<br>13<br>14<br>15<br>16<br>17<br>18<br>19<br>20<br>21<br>22<br>23<br>24<br>25<br>26<br>27<br>28<br>29<br>30<br>31<br>32<br>33<br>34<br>35<br>36<br>37<br>38<br>39<br>40<br>41<br>42<br>43<br>44<br>45<br>46<br>47<br>48<br>49<br>50<br>51<br>52<br>53<br>54<br>55<br>56<br>57<br>58<br>59<br>60 | ヘモグロビン値                   | ←○→ |   |   |   |   |   |   |  |
|                                                                                                                                                                                                                                                                                                                                                             | 搬入後の総輸血量                  | ○   | ○ | ○ | ○ | ○ |   | ○ |  |
|                                                                                                                                                                                                                                                                                                                                                             | 臓器不全の有無                   | ←○→ |   |   |   |   |   |   |  |
|                                                                                                                                                                                                                                                                                                                                                             | 28日後生存                    |     |   |   |   |   |   | ○ |  |
|                                                                                                                                                                                                                                                                                                                                                             | 人工呼吸器や透析、カテコラミンを使用しなかった日数 | ←○→ |   |   |   |   |   |   |  |
|                                                                                                                                                                                                                                                                                                                                                             | 合併症の有無                    | ←○→ |   |   |   |   |   |   |  |
|                                                                                                                                                                                                                                                                                                                                                             | 退院日                       |     |   |   |   |   | ○ |   |  |
|                                                                                                                                                                                                                                                                                                                                                             | 転出先                       |     |   |   |   |   | ○ |   |  |
|                                                                                                                                                                                                                                                                                                                                                             | 退院時の意識状態                  |     |   |   |   |   | ○ |   |  |

## 6) 研究終了後の治療

この研究が終了した後は、この研究で得られた成果も含めて、担当医師は責任をもって最も適切と考える医療（通常治療）を提供いたします。

## 7) 研究参加により予想される利益と不利益 ・ 負担

1 <予想される利益>

2  
3  
4 ① ヘモグロビン値7~9g/dLを目標の場合

5  
6  
7 赤血球輸血の頻度が減少し、輸血関連の合併症(アレルギーのような反応、血栓症の増加、免疫能の低  
8  
9  
10 下)が減少する可能性があります

11  
12  
13 ② ヘモグロビン値10~12g/dLを目標の場合

14  
15 酸素を運ぶ能力が増加して、体の各臓器が良い状況になる可能性があります。

16  
17  
18  
19  
20  
21 <予想される不利益・負担>

22  
23  
24 この治療法によって起きる可能性がある副作用は、これまでの報告などから以下の症状などがありま  
25  
26  
27 す。ただし、本研究では輸血時のヘモグロビン目標値を2群に設定するのみであり、輸血を行うこと自体  
28  
29  
30 は必要な状態であり、通常の診療であることはご理解ください。

31  
32  
33 ① ヘモグロビン値7~9g/dLを目標の場合

34  
35 酸素を運ぶ能力が低下して、体の各臓器に負担がかかる可能性があります。

36  
37  
38 ② ヘモグロビン値10~12g/dLを目標の場合

39  
40  
41 赤血球輸血の頻度が増加し、輸血関連の合併症(アレルギーのような反応、血栓症の増加、免疫能の低  
42  
43  
44 下)が増加する可能性があります。

45  
46  
47  
48  
49  
50 酸素を運ぶ能力が低下して、体の各臓器に負担がかかっていると判断した場合は、輸血を含めて通常診療  
51  
52  
53 どおりに対応します。輸血関連の合併症に対しては、通常診療どおりに対応します。

54  
55  
56 本研究ではモニタリングを実施します。モニタリングにより、定期的に有害事象の程度や頻度がチェック  
57  
58  
59 され、予想されるレベルを超えていると判断される場合は研究中止を含む研究計画の変更が検討されま  
60  
す。予期されない有害事象は報告、審査され、必要に応じて研究機関への情報伝達がなされます。このよ

1  
2  
3  
4  
5  
6  
7  
8  
9  
うに研究対象者のリスクを最小化する努力を行っています。

## 10 11 12 13 14 15 16 17 18 19 20 21 22 23 24 25 26 27 28 29 30 31 32 33 34 35 36 37 38 39 40 41 42 43 44 45 46 47 48 49 50 51 52 53 54 55 56 57 58 59 60

### 5. この研究に参加しない場合の他の治療方法について

これまでの標準的医療として、患者さんの状況に応じて担当医の裁量で、7~12 g/dL程度のヘモグロビン値を目標として、適宜、輸血を行うこととなります。

### 6. 研究への参加の自由と同意撤回の自由について

- 1) この研究への参加はあなたの自由です。この説明文書をよく読んでいただき、ご家族と相談するなど十分に考えたうえ、この研究に参加するかどうかをあなた自身の自由な意思で決めてください。もし、ご不明な点があれば遠慮なくお尋ねください。参加に同意していただける場合には、同意文書に記名捺印または署名をお願いします。もしお断りになっても、今後の治療を受けるうえで不利な扱いを受けることは決してありません。
- 2) 研究の参加はいつでも取りやめることができます。この研究の参加の途中であっても、いつでも参加を取りやめることができますので、ご遠慮なく担当医師にお知らせください。
- 3) この研究への参加を希望しない場合や、研究の途中で参加をとり止める場合、その後の治療に対して何ら不利益を受けることはありません。その時点であなたにとって最善と思われる治療を行います。
- 4) ご家族などの代諾者から同意を得た場合は、患者さんの全身状態が改善して、十分な判断能力がある状態で改めて患者さん自身に本研究について説明し、同意を得るように努めます。この際、患者さん自身にも本研究参加によるメリットとデメリットを丁寧に説明します。

## 7. 個人情報の保護・研究結果の取扱いについて

研究はあなたの個人情報を守った上で行われます。

- 1) この研究で得られたデータは、匿名化して研究用IDで管理します。研究の結果は、学会や医学雑誌等にて公表される予定ですが、その際もあなたのお名前や個人を特定する情報は使用いたしません。
- 2) この研究が適正に行われているかどうかを確認するために、研究の関係者（モニタリング担当者や監査担当者、当研究機関および他機関の倫理委員会の委員など）が、あなたの記録（カルテ、血液検査データ、尿検査データなど）を閲覧することになります。このような場合でも、これらの関係者には守秘義務が課せられていますので、あなたの名前などの個人情報にかかわる情報は守られます。  
(個人情報管理の責任者：久志本 成樹)
- 3) 本研究では検体採取はありません（通常診療における血液検査などは行います）。データは研究終了日から5年／結果公表日から3年（いずれか遅い日）まで保管し、匿名化して廃棄いたします。
- 4) 提供された検査データ等は、匿名化したまま共同研究機関である北海道大学病院先進急性期医療センターへ送られます。そこで全ての共同研究機関の全研究参加者のデータと統合して、解析に用いられます。
- 5) あなた個人の検査データについては、通常の診療と同様に結果がわかり次第お知らせいたします。本研究では通常の診療を超えた検査は行いません。

## 8. 研究資金と利益相反（企業等との利害関係）について

本研究は、公益信託丸茂救急医学研究振興基金助成金および日本損害保険協会交通事故医療研究助成金（申請者：早川 峰司（北海道大学病院先進急性期医療センター 講師）、研究課題名：「重症外傷患者

1  
2 に対する制限輸血戦略の効果検証:クラスターランダム化クロスオーバー非劣性試験)などの研究助成  
3  
4 金および各施設の研究費などを使用し、通常診療の範囲内にて実施します。研究責任者および研究分担  
5  
6 者において、本研究で対象とする赤血球製剤の製造販売元である日本赤十字社と利益相反があるものは  
7  
8  
9  
10 いません。

11  
12 本研究は、研究責任者のグループにより公正に行われます。本研究における企業等との利害関係に追加・  
13  
14 変更が生じた場合はその都度、東北大学利益相反マネジメント委員会へ申告し審査を受けることにより、  
15  
16 本研究の企業等と利害関係についての公正性を保ちます。この研究の結果により特許権等が生じた場合  
17  
18  
19  
20  
21  
22  
23  
24  
25  
26  
27  
28  
29  
30  
31  
32  
33  
34  
35  
36  
37  
38  
39  
40  
41  
42  
43  
44  
45  
46  
47  
48  
49  
50  
51  
52  
53  
54  
55  
56  
57  
58  
59  
60

は、その帰属先は東北大学になります。あなたには帰属しません。

## 9. この研究により健康被害が発生した場合の対応について

### 1) 健康被害（副作用）が発生した場合

この研究に参加中または研究終了後に、今までになかった症状が現れたり、何か変わったことに気付いたときは、担当の医師、研究の相談窓口にお知らせください。また、研究期間中は研究が原因と考えられないことで（例えば事故、ケガなど）入院されたり、当院の他科、他の研究機関を受診されたりする場合でも、ご連絡ください。

### 2) 健康被害が発生した場合の治療および賠償、補償

この研究は、保険適用が認められた標準的な治療を行いながら実施するものです。したがって、この研究中に健康被害が発生して検査や治療などが必要となった場合の費用は、通常の診療と同様に、医療費はあなたが加入している健康保険が使用されます。この研究による特別な補償はありません。

## 10. 研究への参加が中止となる場合について

1  
2  
3  
4  
5  
6  
7 研究中であっても、以下の場合には研究を中止させていただきます。その場合であっても、試験薬／試  
8  
9  
10 験機器による治療を一度でも受けた方には、健康状態を確認するために、中止時の検査を行うことがあり  
11  
12  
13 ます。

- 14  
15 1) あなたがこの研究への参加を取りやめたいと申し出たとき
- 16  
17 2) あなたの体の具合が悪くなり、担当医師が研究をやめると決めたとき
- 18  
19 3) 妊娠していることがわかったとき
- 20  
21 4) 途中であなたがこの研究に参加できる人に当てはまらないことがわかったとき
- 22  
23 5) 試験薬による治療後、あなたの体の具合が悪くなって、担当医師が試験薬による治療をやめたほうが  
24  
25  
26  
27  
28  
29  
30 よいと判断したとき
- 31  
32 6) この試験薬製造販売している医薬品メーカーが製造販売を中断・中止したとき
- 33  
34  
35 7) 担当医師が研究をやめたほうがよいと判断したとき

36  
37  
38 以上の理由とは別に、この試験薬があなたに不利益をもたらすかもしれないという情報が得られたと  
39  
40  
41  
42  
43  
44  
45  
46  
47  
48  
49  
50  
51  
52  
53  
54  
55  
56  
57  
58  
59  
60  
き、研究自体を中止または中断することがあります。その場合も、あなたと相談のうえ担当医師が最善の  
治療を行います。

61  
62  
63  
64  
65  
66  
67  
68  
69  
70  
71  
72  
73  
74  
75  
76  
77  
78  
79  
80  
81  
82  
83  
84  
85  
86  
87  
88  
89  
90  
91  
92  
93  
94  
95  
96  
97  
98  
99  
100  
101  
102  
103  
104  
105  
106  
107  
108  
109  
110  
111  
112  
113  
114  
115  
116  
117  
118  
119  
120  
121  
122  
123  
124  
125  
126  
127  
128  
129  
130  
131  
132  
133  
134  
135  
136  
137  
138  
139  
140  
141  
142  
143  
144  
145  
146  
147  
148  
149  
150  
151  
152  
153  
154  
155  
156  
157  
158  
159  
160  
161  
162  
163  
164  
165  
166  
167  
168  
169  
170  
171  
172  
173  
174  
175  
176  
177  
178  
179  
180  
181  
182  
183  
184  
185  
186  
187  
188  
189  
190  
191  
192  
193  
194  
195  
196  
197  
198  
199  
200  
201  
202  
203  
204  
205  
206  
207  
208  
209  
210  
211  
212  
213  
214  
215  
216  
217  
218  
219  
220  
221  
222  
223  
224  
225  
226  
227  
228  
229  
230  
231  
232  
233  
234  
235  
236  
237  
238  
239  
240  
241  
242  
243  
244  
245  
246  
247  
248  
249  
250  
251  
252  
253  
254  
255  
256  
257  
258  
259  
260  
261  
262  
263  
264  
265  
266  
267  
268  
269  
270  
271  
272  
273  
274  
275  
276  
277  
278  
279  
280  
281  
282  
283  
284  
285  
286  
287  
288  
289  
290  
291  
292  
293  
294  
295  
296  
297  
298  
299  
300  
301  
302  
303  
304  
305  
306  
307  
308  
309  
310  
311  
312  
313  
314  
315  
316  
317  
318  
319  
320  
321  
322  
323  
324  
325  
326  
327  
328  
329  
330  
331  
332  
333  
334  
335  
336  
337  
338  
339  
340  
341  
342  
343  
344  
345  
346  
347  
348  
349  
350  
351  
352  
353  
354  
355  
356  
357  
358  
359  
360  
361  
362  
363  
364  
365  
366  
367  
368  
369  
370  
371  
372  
373  
374  
375  
376  
377  
378  
379  
380  
381  
382  
383  
384  
385  
386  
387  
388  
389  
390  
391  
392  
393  
394  
395  
396  
397  
398  
399  
400  
401  
402  
403  
404  
405  
406  
407  
408  
409  
410  
411  
412  
413  
414  
415  
416  
417  
418  
419  
420  
421  
422  
423  
424  
425  
426  
427  
428  
429  
430  
431  
432  
433  
434  
435  
436  
437  
438  
439  
440  
441  
442  
443  
444  
445  
446  
447  
448  
449  
450  
451  
452  
453  
454  
455  
456  
457  
458  
459  
460  
461  
462  
463  
464  
465  
466  
467  
468  
469  
470  
471  
472  
473  
474  
475  
476  
477  
478  
479  
480  
481  
482  
483  
484  
485  
486  
487  
488  
489  
490  
491  
492  
493  
494  
495  
496  
497  
498  
499  
500  
501  
502  
503  
504  
505  
506  
507  
508  
509  
510  
511  
512  
513  
514  
515  
516  
517  
518  
519  
520  
521  
522  
523  
524  
525  
526  
527  
528  
529  
530  
531  
532  
533  
534  
535  
536  
537  
538  
539  
540  
541  
542  
543  
544  
545  
546  
547  
548  
549  
550  
551  
552  
553  
554  
555  
556  
557  
558  
559  
560  
561  
562  
563  
564  
565  
566  
567  
568  
569  
570  
571  
572  
573  
574  
575  
576  
577  
578  
579  
580  
581  
582  
583  
584  
585  
586  
587  
588  
589  
590  
591  
592  
593  
594  
595  
596  
597  
598  
599  
600  
601  
602  
603  
604  
605  
606  
607  
608  
609  
610  
611  
612  
613  
614  
615  
616  
617  
618  
619  
620  
621  
622  
623  
624  
625  
626  
627  
628  
629  
630  
631  
632  
633  
634  
635  
636  
637  
638  
639  
640  
641  
642  
643  
644  
645  
646  
647  
648  
649  
650  
651  
652  
653  
654  
655  
656  
657  
658  
659  
660  
661  
662  
663  
664  
665  
666  
667  
668  
669  
670  
671  
672  
673  
674  
675  
676  
677  
678  
679  
680  
681  
682  
683  
684  
685  
686  
687  
688  
689  
690  
691  
692  
693  
694  
695  
696  
697  
698  
699  
700  
701  
702  
703  
704  
705  
706  
707  
708  
709  
710  
711  
712  
713  
714  
715  
716  
717  
718  
719  
720  
721  
722  
723  
724  
725  
726  
727  
728  
729  
730  
731  
732  
733  
734  
735  
736  
737  
738  
739  
740  
741  
742  
743  
744  
745  
746  
747  
748  
749  
750  
751  
752  
753  
754  
755  
756  
757  
758  
759  
760  
761  
762  
763  
764  
765  
766  
767  
768  
769  
770  
771  
772  
773  
774  
775  
776  
777  
778  
779  
780  
781  
782  
783  
784  
785  
786  
787  
788  
789  
790  
791  
792  
793  
794  
795  
796  
797  
798  
799  
800  
801  
802  
803  
804  
805  
806  
807  
808  
809  
810  
811  
812  
813  
814  
815  
816  
817  
818  
819  
820  
821  
822  
823  
824  
825  
826  
827  
828  
829  
830  
831  
832  
833  
834  
835  
836  
837  
838  
839  
840  
841  
842  
843  
844  
845  
846  
847  
848  
849  
850  
851  
852  
853  
854  
855  
856  
857  
858  
859  
860  
861  
862  
863  
864  
865  
866  
867  
868  
869  
870  
871  
872  
873  
874  
875  
876  
877  
878  
879  
880  
881  
882  
883  
884  
885  
886  
887  
888  
889  
890  
891  
892  
893  
894  
895  
896  
897  
898  
899  
900  
901  
902  
903  
904  
905  
906  
907  
908  
909  
910  
911  
912  
913  
914  
915  
916  
917  
918  
919  
920  
921  
922  
923  
924  
925  
926  
927  
928  
929  
930  
931  
932  
933  
934  
935  
936  
937  
938  
939  
940  
941  
942  
943  
944  
945  
946  
947  
948  
949  
950  
951  
952  
953  
954  
955  
956  
957  
958  
959  
960  
961  
962  
963  
964  
965  
966  
967  
968  
969  
970  
971  
972  
973  
974  
975  
976  
977  
978  
979  
980  
981  
982  
983  
984  
985  
986  
987  
988  
989  
990  
991  
992  
993  
994  
995  
996  
997  
998  
999  
1000

なお、この研究に関連してそれまでに集められたあなたの診療の記録や検査結果は使用させていただきます。もし、その使用について取りやめたい場合はお知らせください。

## 11. 将来の研究のために用いる可能性／他の研究機関に提供する可能性

(例 1) あなたから提供された検査データ等は、同意を受ける時点では特定されない将来の研究のために



1  
2 用いる可能性があります。利用する場合は、その研究計画が倫理委員会で承認された上で利用いたしま  
3  
4 す。また、他の研究機関に試料・情報を提供する場合には、病院長に報告し、個人を特定できない形式に  
5  
6  
7 した上で提供します。  
8  
9

## 12. 研究に関する費用について

10  
11  
12  
13  
14  
15  
16  
17  
18 本研究は、通常診療の範囲内で行われる研究のため研究に参加しない場合と同じ費用をお支払いいただき  
19  
20  
21  
22  
23  
24  
25  
26  
27  
28  
29  
30  
31  
32  
33  
34  
35  
36  
37  
38  
39  
40  
41  
42  
43  
44  
45  
46  
47  
48  
49  
50  
51  
52  
53  
54  
55  
56  
57  
58  
59  
60  
61  
62  
63  
64  
65  
66  
67  
68  
69  
70  
71  
72  
73  
74  
75  
76  
77  
78  
79  
80  
81  
82  
83  
84  
85  
86  
87  
88  
89  
90  
91  
92  
93  
94  
95  
96  
97  
98  
99  
100  
101  
102  
103  
104  
105  
106  
107  
108  
109  
110  
111  
112  
113  
114  
115  
116  
117  
118  
119  
120  
121  
122  
123  
124  
125  
126  
127  
128  
129  
130  
131  
132  
133  
134  
135  
136  
137  
138  
139  
140  
141  
142  
143  
144  
145  
146  
147  
148  
149  
150  
151  
152  
153  
154  
155  
156  
157  
158  
159  
160  
161  
162  
163  
164  
165  
166  
167  
168  
169  
170  
171  
172  
173  
174  
175  
176  
177  
178  
179  
180  
181  
182  
183  
184  
185  
186  
187  
188  
189  
190  
191  
192  
193  
194  
195  
196  
197  
198  
199  
200  
201  
202  
203  
204  
205  
206  
207  
208  
209  
210  
211  
212  
213  
214  
215  
216  
217  
218  
219  
220  
221  
222  
223  
224  
225  
226  
227  
228  
229  
230  
231  
232  
233  
234  
235  
236  
237  
238  
239  
240  
241  
242  
243  
244  
245  
246  
247  
248  
249  
250  
251  
252  
253  
254  
255  
256  
257  
258  
259  
260  
261  
262  
263  
264  
265  
266  
267  
268  
269  
270  
271  
272  
273  
274  
275  
276  
277  
278  
279  
280  
281  
282  
283  
284  
285  
286  
287  
288  
289  
290  
291  
292  
293  
294  
295  
296  
297  
298  
299  
300  
301  
302  
303  
304  
305  
306  
307  
308  
309  
310  
311  
312  
313  
314  
315  
316  
317  
318  
319  
320  
321  
322  
323  
324  
325  
326  
327  
328  
329  
330  
331  
332  
333  
334  
335  
336  
337  
338  
339  
340  
341  
342  
343  
344  
345  
346  
347  
348  
349  
350  
351  
352  
353  
354  
355  
356  
357  
358  
359  
360  
361  
362  
363  
364  
365  
366  
367  
368  
369  
370  
371  
372  
373  
374  
375  
376  
377  
378  
379  
380  
381  
382  
383  
384  
385  
386  
387  
388  
389  
390  
391  
392  
393  
394  
395  
396  
397  
398  
399  
400  
401  
402  
403  
404  
405  
406  
407  
408  
409  
410  
411  
412  
413  
414  
415  
416  
417  
418  
419  
420  
421  
422  
423  
424  
425  
426  
427  
428  
429  
430  
431  
432  
433  
434  
435  
436  
437  
438  
439  
440  
441  
442  
443  
444  
445  
446  
447  
448  
449  
450  
451  
452  
453  
454  
455  
456  
457  
458  
459  
460  
461  
462  
463  
464  
465  
466  
467  
468  
469  
470  
471  
472  
473  
474  
475  
476  
477  
478  
479  
480  
481  
482  
483  
484  
485  
486  
487  
488  
489  
490  
491  
492  
493  
494  
495  
496  
497  
498  
499  
500  
501  
502  
503  
504  
505  
506  
507  
508  
509  
510  
511  
512  
513  
514  
515  
516  
517  
518  
519  
520  
521  
522  
523  
524  
525  
526  
527  
528  
529  
530  
531  
532  
533  
534  
535  
536  
537  
538  
539  
540  
541  
542  
543  
544  
545  
546  
547  
548  
549  
550  
551  
552  
553  
554  
555  
556  
557  
558  
559  
560  
561  
562  
563  
564  
565  
566  
567  
568  
569  
570  
571  
572  
573  
574  
575  
576  
577  
578  
579  
580  
581  
582  
583  
584  
585  
586  
587  
588  
589  
590  
591  
592  
593  
594  
595  
596  
597  
598  
599  
600  
601  
602  
603  
604  
605  
606  
607  
608  
609  
610  
611  
612  
613  
614  
615  
616  
617  
618  
619  
620  
621  
622  
623  
624  
625  
626  
627  
628  
629  
630  
631  
632  
633  
634  
635  
636  
637  
638  
639  
640  
641  
642  
643  
644  
645  
646  
647  
648  
649  
650  
651  
652  
653  
654  
655  
656  
657  
658  
659  
660  
661  
662  
663  
664  
665  
666  
667  
668  
669  
670  
671  
672  
673  
674  
675  
676  
677  
678  
679  
680  
681  
682  
683  
684  
685  
686  
687  
688  
689  
690  
691  
692  
693  
694  
695  
696  
697  
698  
699  
700  
701  
702  
703  
704  
705  
706  
707  
708  
709  
710  
711  
712  
713  
714  
715  
716  
717  
718  
719  
720  
721  
722  
723  
724  
725  
726  
727  
728  
729  
730  
731  
732  
733  
734  
735  
736  
737  
738  
739  
740  
741  
742  
743  
744  
745  
746  
747  
748  
749  
750  
751  
752  
753  
754  
755  
756  
757  
758  
759  
760  
761  
762  
763  
764  
765  
766  
767  
768  
769  
770  
771  
772  
773  
774  
775  
776  
777  
778  
779  
780  
781  
782  
783  
784  
785  
786  
787  
788  
789  
790  
791  
792  
793  
794  
795  
796  
797  
798  
799  
800  
801  
802  
803  
804  
805  
806  
807  
808  
809  
810  
811  
812  
813  
814  
815  
816  
817  
818  
819  
820  
821  
822  
823  
824  
825  
826  
827  
828  
829  
830  
831  
832  
833  
834  
835  
836  
837  
838  
839  
840  
841  
842  
843  
844  
845  
846  
847  
848  
849  
850  
851  
852  
853  
854  
855  
856  
857  
858  
859  
860  
861  
862  
863  
864  
865  
866  
867  
868  
869  
870  
871  
872  
873  
874  
875  
876  
877  
878  
879  
880  
881  
882  
883  
884  
885  
886  
887  
888  
889  
890  
891  
892  
893  
894  
895  
896  
897  
898  
899  
900  
901  
902  
903  
904  
905  
906  
907  
908  
909  
910  
911  
912  
913  
914  
915  
916  
917  
918  
919  
920  
921  
922  
923  
924  
925  
926  
927  
928  
929  
930  
931  
932  
933  
934  
935  
936  
937  
938  
939  
940  
941  
942  
943  
944  
945  
946  
947  
948  
949  
950  
951  
952  
953  
954  
955  
956  
957  
958  
959  
960  
961  
962  
963  
964  
965  
966  
967  
968  
969  
970  
971  
972  
973  
974  
975  
976  
977  
978  
979  
980  
981  
982  
983  
984  
985  
986  
987  
988  
989  
990  
991  
992  
993  
994  
995  
996  
997  
998  
999  
1000

## 13. あなたに守っていただきたい事項について

あなたがこの研究に参加されている間、次のことを守ってください。

- 1) あなたの具合がいつもと違うとか、何か変わった症状がある場合は、すぐに連絡してください。
- 2) あなたが退院後に当病院の他の診療科や他の病院を受診される場合は、この研究の担当医師に、他の診療科や他の病院を受診予定であることをお知らせください。研究に参加いただく方の安全性の確保や研究による影響の有無を確認するために、あなたの上承を得たうえで、研究に参加していることを担当医に連絡し、治療の内容（使用した薬など）について問い合わせをさせていただくことがあります。

## 14. 研究に関する情報公開の方法

この研究の概要については、データベース（UMIN）に登録して公開しています。個人が特定される情報は公開されません。

この研究の方法等を記載した資料をご覧になりたい場合は、他の試料提供者の個人情報に関わる部分や研究の独創性確保に支障のない範囲でお見せいたします。

## 15. 相談窓口

試験薬による治療以外にもこの病気に対する治療は最善を尽くして行いますので、ご安心ください。その他、研究についてわからないこと、心配なことがありましたら、相談窓口にお問い合わせください。

（現時点で特定されない研究については実施が未定のため、他の方の個人情報については個人情報保護のため、知的財産については知的財産保護のため、お答えできないことをご了承ください。）

研究責任者：久志本 成樹（救急科教授、高度救命救急センター 部長）

担当者：工藤 大介（救急科・高度救命救急センター 講師）

### 【連絡先】

東北大学病院救急科・高度救命救急センター

〒980-8574 宮城県仙台市青葉区星陵町 1-1

平日 022-717-7024、夜間・休日 022-717-7024

## 同意書

1  
2  
3  
4 東北大学病院長 殿  
5  
6  
7  
8  
9

10 私は、「重症外傷患者に対する制限輸血戦略 クラスターランダム化クロスオーバー非劣性試験」につい  
11  
12 て、担当医師から、以下について説明を受けました。  
13  
14

|                                                                                                                                                                                                                                                                                                                                                                                                                                                                                                                                                                                    |                                                                                                                                                                                                                                                                                                            |
|------------------------------------------------------------------------------------------------------------------------------------------------------------------------------------------------------------------------------------------------------------------------------------------------------------------------------------------------------------------------------------------------------------------------------------------------------------------------------------------------------------------------------------------------------------------------------------|------------------------------------------------------------------------------------------------------------------------------------------------------------------------------------------------------------------------------------------------------------------------------------------------------------|
| <p>15 <input type="checkbox"/> 1. 医学系研究について</p> <p>16 <input type="checkbox"/> 2. この研究の背景について</p> <p>17 <input type="checkbox"/> 3. 赤血球輸血について</p> <p>18 <input type="checkbox"/> 4. 研究の内容・期間について</p> <p>19 <input type="checkbox"/> 5. この研究に参加しない場合の他の治療方法について</p> <p>20 <input type="checkbox"/> 6. 研究への参加の自由と同意撤回の自由について</p> <p>21 <input type="checkbox"/> 7. 個人情報の保護・研究結果の取扱いについて</p> <p>22 <input type="checkbox"/> 8. 研究資金と利益相反（企業等との利害関係）について</p> <p>23 <input type="checkbox"/> 9. この研究により健康被害が発生した場合の対応について</p> <p>24 <input type="checkbox"/> 10. 研究への参加が中止となる場合について</p> | <p>25 <input type="checkbox"/> 11. 将来の研究のために用いる可能性／<br/>他の研究機関に提供する可能性</p> <p>26 <input type="checkbox"/> 12. 研究に関する費用について</p> <p>27 <input type="checkbox"/> 13. あなたに守っていただきたい事項につい<br/>て</p> <p>28 <input type="checkbox"/> 14. 研究に関する情報公開および資料閲覧方<br/>法</p> <p>29 <input type="checkbox"/> 15. 相談窓口</p> |
|------------------------------------------------------------------------------------------------------------------------------------------------------------------------------------------------------------------------------------------------------------------------------------------------------------------------------------------------------------------------------------------------------------------------------------------------------------------------------------------------------------------------------------------------------------------------------------|------------------------------------------------------------------------------------------------------------------------------------------------------------------------------------------------------------------------------------------------------------------------------------------------------------|

30 十分納得しましたので、本研究に参加することに同意します。なお、同意書の写しを受け取りました。  
31  
32  
33  
34  
35  
36  
37  
38  
39  
40  
41  
42  
43

44  
45  
46  
47  
48  
49 (本人)

50  
51  
52 同意年月日 西暦 年 月 日

53  
54 住所

55  
56  
57  
58 氏名 (印) (署名または記名捺印・以下同じ)  
59  
60

1  
2  
3  
4  
5  
6  
7  
8  
9  
10  
11  
12  
13  
14  
15  
16  
17  
18  
19  
20  
21  
22  
23  
24  
25  
26  
27  
28  
29  
30  
31  
32  
33  
34  
35  
36  
37  
38  
39  
40  
41  
42  
43  
44  
45  
46  
47  
48  
49  
50  
51  
52  
53  
54  
55  
56  
57  
58  
59  
60

(代諾者・本人との関係 \_\_\_\_\_ )

(代諾者・本人との関係 \_\_\_\_\_ )

同意年月日 西暦 年 月 日

同意年月日 西暦 年 月 日

住 所

住 所

氏 名 (印)

氏 名 (印)

(立会人)

住 所

氏 名 (印)

別紙同意説明文書について、私が説明しました。

担当者 診療科名 救急科

記入年月日 西暦 年 月 日

氏名 (印)

連絡先

2019年11月11日作成 2版

## 同意撤回書

1  
2  
3  
4  
5  
6  
7 東北大学病院長 殿  
8  
9

10 (本人) 郵便番号

11  
12 記入年月日 西暦 年 月 日

13  
14  
15 住 所

16  
17  
18 氏 名 (印)

19  
20  
21 (署名または記名捺印・以下同じ)

22  
23  
24  
25  
26  
27  
28  
29  
30 (代諾者・本人との関係 \_\_\_\_\_)

31  
32 記入年月日 西暦 年 月 日

33  
34  
35 住 所

36  
37  
38 氏 名 (印)

39  
40  
41  
42  
43  
44  
45  
46  
47 私は、「重症外傷患者に対する制限輸血戦略 クラスタランダム化クロスオーバー非劣性試験」につ  
48  
49 いて、同意を撤回します。なお、同意撤回書の写しを受け取りました。  
50  
51  
52  
53  
54  
55  
56  
57  
58  
59  
60

### Consent Form

To the Director of the Tohoku University Hospital

I have read the following information, or it has been read to me. I have had the opportunity to ask questions about it and any questions that I have asked, have been answered to my satisfaction.

1. About clinical trials
2. Background of this clinical trial
3. Red blood cells transfusion
4. Research content and period
5. Other treatment options if participation from this clinical trial is withdrawn
6. Freedom to participate in this clinical trial and withdraw consent
7. Protection of personal information and handling of research results
8. Research funds and conflicts of interest
9. What to do if this research causes health problems
10. About a case where participation in research is canceled
11. Possibility of using the data for future research and providing it to other research institutes
12. Research costs
13. Recommendations that are to be followed
14. Method of disclosing information and viewing research materials
15. Consultation counter

I voluntarily give my consent to participate in this research.

Printed Name of Participant \_\_\_\_\_

Signature of Participant \_\_\_\_\_ Date \_\_\_\_\_

Printed Name of Representative \_\_\_\_\_

Relationship with Participant \_\_\_\_\_

Signature of Representative \_\_\_\_\_ Date \_\_\_\_\_

I have accurately explained the information of this clinical trial to the potential participant.

Printed Name of Researcher \_\_\_\_\_

Signature of Researcher \_\_\_\_\_ Date \_\_\_\_\_

自主臨床研究

# 重症外傷患者に対する制限輸血戦略 クラスターランダム化クロスオーバー非劣性試験

## 研究実施計画書

研究統括組織および責任者

東北大学大学院 医学系研究科外科病態学講座 救急医学分野  
久志本成樹

研究事務局

北海道大学病院

救急科 早川峰司

作成日

|             |     |         |
|-------------|-----|---------|
| 2018年3月28日  | 計画書 | 第1版作成   |
| 2018年5月30日  | 計画書 | 第1.1版作成 |
| 2018年7月11日  | 計画書 | 第1.2版作成 |
| 2018年8月23日  | 計画書 | 第1.3版作成 |
| 2018年12月3日  | 計画書 | 第1.4版作成 |
| 2019年2月15日  | 計画書 | 第1.5版作成 |
| 2019年5月20日  | 計画書 | 第1.6版作成 |
| 2019年10月15日 | 計画書 | 第1.7版作成 |

研究実施期間：2019年5月7日～2022年12月31日  
(症例登録締切日：各施設の症例登録開始後2年1ヶ月)

## 目次

|    |                                         |    |
|----|-----------------------------------------|----|
| 1  |                                         |    |
| 2  |                                         |    |
| 3  |                                         |    |
| 4  |                                         |    |
| 5  | 1. 研究の背景.....                           | 2  |
| 6  | 2. 研究の目的.....                           | 2  |
| 7  | 3. 試験薬又は試験機器の概要.....                    | 2  |
| 8  | 4. 研究対象者及び適格性の基準.....                   | 2  |
| 9  | 5. 研究の方法.....                           | 3  |
| 10 | 6. 症例登録、割付方法.....                       | 4  |
| 11 | 7. 観察及び検査項目.....                        | 5  |
| 12 | 8. 予想される利益及び不利益（負担及びリスク）.....           | 7  |
| 13 | 9. 評価項目（エンドポイント）.....                   | 7  |
| 14 | 10. 個々の研究対象者における中止基準及び研究実施後の対応.....     | 7  |
| 15 | 11. 個々の研究対象者における研究によって得られた検査結果の取扱い..... | 8  |
| 16 | 12. 有害事象発生時の取扱い.....                    | 8  |
| 17 | 13. 研究実施計画書等の承認・変更、改訂.....              | 9  |
| 18 | 14. 研究の中止・中断、終了.....                    | 9  |
| 19 | 15. 研究実施期間.....                         | 9  |
| 20 | 16. 目標症例数とその設定根拠及び統計解析方法.....           | 9  |
| 21 | 17. 研究対象者の人権に対する配慮.....                 | 10 |
| 22 | 18. 個人情報の取扱い.....                       | 10 |
| 23 | 19. 同意取得方法.....                         | 10 |
| 24 | 20. 研究対象者の健康被害への対応と補償.....              | 11 |
| 25 | 21. 研究機関の長への報告内容及び方法.....               | 12 |
| 26 | 22. 効果・安全性評価委員会.....                    | 12 |
| 27 | 23. 研究対象者の費用負担.....                     | 12 |
| 28 | 24. 試料・情報等の保管及び廃棄の方法.....               | 12 |
| 29 | 25. 研究に関する情報公開の方法及び研究結果の公表.....         | 13 |
| 30 | 26. 研究資金及び利益相反.....                     | 13 |
| 31 | 27. モニタリング.....                         | 13 |
| 32 | 28. 監査.....                             | 14 |
| 33 | 29. 研究実施体制.....                         | 14 |
| 34 | 30. 参考資料・文献リスト.....                     | 16 |
| 35 |                                         |    |
| 36 |                                         |    |
| 37 |                                         |    |
| 38 |                                         |    |
| 39 |                                         |    |
| 40 |                                         |    |
| 41 |                                         |    |
| 42 |                                         |    |
| 43 |                                         |    |
| 44 |                                         |    |
| 45 |                                         |    |
| 46 |                                         |    |
| 47 |                                         |    |
| 48 |                                         |    |
| 49 |                                         |    |
| 50 |                                         |    |
| 51 |                                         |    |
| 52 |                                         |    |
| 53 |                                         |    |
| 54 |                                         |    |
| 55 |                                         |    |
| 56 |                                         |    |
| 57 |                                         |    |
| 58 |                                         |    |
| 59 |                                         |    |
| 60 |                                         |    |



## 1. 研究の背景

重症外傷患者は、出血とともに外傷に伴う全身性炎症反応などにより輸血を要する頻度が高い。日本外傷学会が主導した多施設共同観察研究では、Injury Severity Score (ISS)16以上の重症外傷患者 796 症例のうち 6 時間以内に 207 症例(26%)、24 時間以内に 241 症例(30%)が赤血球輸血を受けている<sup>1)</sup>。しかし、重症外傷患者管理における急性期の至適な輸血閾値は明らかでない。

ICU に入床した 838 名の重症患者を対象として赤血球輸血の閾値を検証した TRICC study<sup>2)</sup>では、ICU 入室後 72 時間以内にヘモグロビン値が 9.0g/dL を下回った患者が対象となっている。ヘモグロビン値の目標を 10~12g/dL と 7~9g/dL に設定し比較しているが、統計学的な有意差は伴わないものの、7~9g/dL を目標とした患者群(輸血制限群)の方が、生命予後や臓器不全の合併頻度に良い傾向を認めていた。しかも、輸血量は輸血制限群の方が有意に少なかった。この TRICC study から 203 名の外傷患者を抽出した subgroup 解析<sup>3)</sup>が報告されている。この subgroup 解析では、輸血制限群で生命予後や臓器不全の合併頻度に差を認めることなく、輸血量が減少していることが示されている。

しかし、TRICC study<sup>2)</sup>では活動性の出血を伴う症例は除外されていることや、ICU 入室後の研究であるため、ICU 入室前の輸血戦略や止血術(外科的止血や interventional radiology(IVR))などが考慮されていない。このため、外傷急性期の輸血戦略の根拠として TRICC study の結果を用いるのは不適切な可能性がある。

一方、外傷性脳損傷(traumatic brain injury; TBI)患者は、脳への酸素供給を増加させることにより予後を改善できる可能性の観点から、制限輸血療法の独立した検討対象となっている。Epo Severe TBI Trial<sup>4)</sup>は、閉鎖性外傷性脳損傷を対象として制限輸血の影響を検討した RCT である。制限輸血群の神経学的予後は、統計学的有意差は認めないものの、標準輸血群よりも良い傾向を示していた。また、Clinical trials. gov にも同様の TBI を対象とした輸血閾値を検討する RCT が登録されている (NCT02203292, NCT02968654, NCT03260478)。

このような現状を鑑みると、重症外傷全般を対象とした外傷急性期の赤血球輸血の目標ヘモグロビン値を検証し、適切な輸血戦略を明確にすることは、これまでに明らかにされていない外傷患者の予後の向上に寄与する重要な課題であると考えられる。

## 2. 研究の目的

重症外傷患者における、目標ヘモグロビン高値輸血戦略に対する目標ヘモグロビン低値輸血戦略の生命予後、輸血量、臓器障害合併への影響を検証する

## 3. 試験薬又は試験機器の概要

該当なし

## 4. 研究対象者及び適格性の基準

(1) 対象者のうち、(2) 選択基準をすべて満たし、かつ (3) 除外基準のいずれにも該当しない場合を適格とする。

### (1) 対象者

本研究に参加する施設に搬入された外傷患者

### (2) 選択基準

①同意取得時において年齢が20歳以上の者

②不安定な循環動態の原因となりうる重篤な出血があると担当医が判断した患者、

もしくは、今後そのようなおそれがあると担当医が判断した患者、  
もしくは、急性期の外科的手術に伴い上記の出血を来す可能性があるとして担当医が判断した患者

- ③本研究への参加にあたり十分な説明を受けた後、十分な理解の上、本人もしくは代諾者の自由意思による文書同意が得られた者

### (3) 除外基準

- ①病院前心停止もしくは搬入時心停止
- ②転院搬送症例
- ③初期評価の際に積極的加療の中止が決定された患者
- ④広範囲熱傷(熱傷面積15%以上)の合併
- ⑤妊娠中
- ⑥慢性貧血(ヘモグロビン値 $\leq$  7mg/dL)
- ⑦輸血拒否
- ⑧その他、研究責任者が研究対象者として不適当と判断した者

上記の患者の選択/除外は、病院への搬入後の時間的経過も考慮する。時間経過と選択基準、除外基準の関係はフローチャートを参照すること。

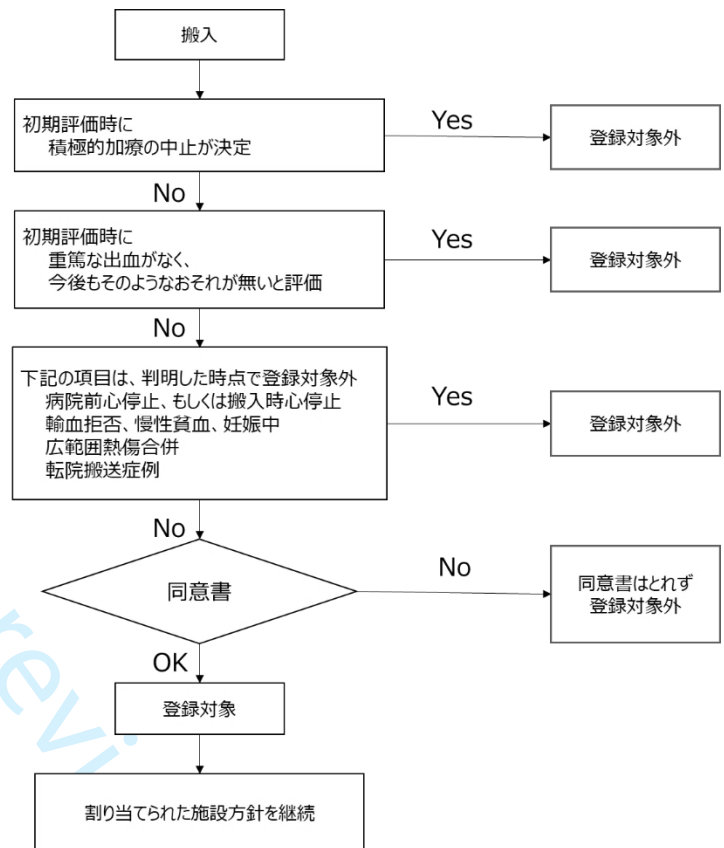

### (4) 代諾者による同意が必要な研究対象者とその理由

本研究では有効なインフォームド・コンセントを得ることが困難であると考えられる研究対象者を対象に加える。本研究の対象疾患に主として見られる特有の事象に係る研究であると考えられるためである。尚、代諾者としては、研究対象者の家族構成等を勘案して、研究対象者の意思及び利益を代弁できると考えられる者を選択することを基本とし、以下の者とする。

研究対象者の配偶者、成人の子、成人の兄弟姉妹若しくは孫、祖父母、同居の親族又はそれらの近親者に準ずると考えられる者。このうち、可能な限り近しい親族を代諾者に選定および依頼する。

## 5. 研究の方法

### (1) 研究の種類・デザイン

クラスターランダム化クロスオーバー非劣性試験

### (2) 試験のアウトライン

本研究は、施設に対して目標ヘモグロビン高値輸血戦略と目標ヘモグロビン低値輸血戦略の2つの輸血戦略を割り付けるクラスターランダム化試験である。研究参加施設決定後、

無作為化を行い目標ヘモグロビン高値輸血戦略施設あるいは目標ヘモグロビン低値輸血戦略施設に割付る。

目標ヘモグロビン高値輸血戦略では、目標ヘモグロビン値を10~12g/dLとし、目標ヘモグロビン低値輸血戦略では目標ヘモグロビン値を7~9g/dLとする。この目標ヘモグロビン値は、あくまでも目標であり、輸血開始基準ではなく、輸血開始のタイミング、投与スピードなどは臨床的判断で実施する。いずれの目標設定も患者搬入後、以下の何れか早い時期までとする。

- ・ 搬入から7日目
- ・ ICU退室（退院/転院を含む）
- ・ 積極的な治療の中止
- ・ 死亡

本研究では、必要に応じて、担当医の判断で、止血術を含め様々な治療を実施する。

各研究参加施設は、研究参加1年後に、1カ月間のwashout期間を設けた後、クロスオーバーを行い、もう一方の輸血戦略を実施する施設とする。Washout期間には、患者の組み入れは行わない。

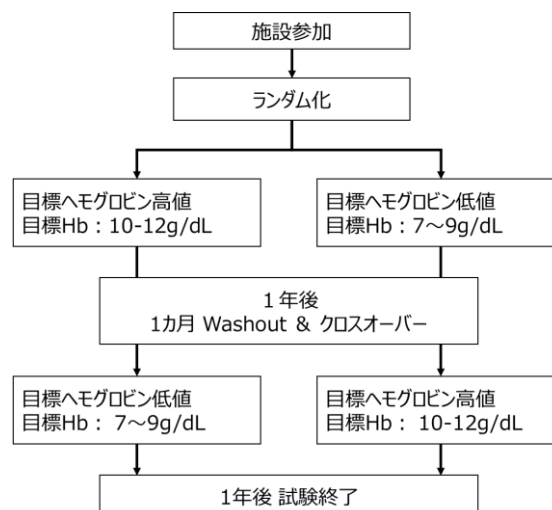

### (3) 研究参加施設の適格基準

本研究に参加できる施設は、下記の基準をすべて満たした施設とする。

- ① 重症外傷患者の診療を行っている
- ② 本研究計画について、自施設の自主臨床研究審査委員会もしくは各実施医療機関の該当する審査委員会（以降、審査委員会）の承認を得ている
- ③ 本研究への参加について、施設長もしくは部門長の同意書を研究事務局に提出している

### (4) 試験薬の投与方法又は試験機器の使用方法

該当なし

### (5) 併用薬（療法）についての規定

該当なし

### (6) 減量及び休薬についての規定

該当なし

### (7) 研究対象者の研究参加予定期間

受傷後28日間観察期間を研究参加期間とする。

## 6. 症例登録、割付方法

### (1) 施設登録/割付方法

研究事務局の割付担当者は、研究参加施設の参加適格基準を確認後、各施設に輸血戦略の割付を行う。各施設に対する輸血戦略の割付は中央登録方式にて行う。予め作成したランダム割付表に従い、試験参加決定順に、順次、割付を行う。割付表は割付担当者が保管し、研究責任者及び研究分担者には開示しない。

各施設の研究責任者は、研究事務局から研究参加に関する適格性の確認を受け、選択すべき輸血戦略とその期間等が記載された登録確認書を受領する。

また、各施設の研究責任者は、各施設が本研究に参加していること、目標としているヘモグロビン値とその期間を、各施設の定められた方法で情報公開を行う。

1  
2  
3  
4  
5  
6  
7  
8  
9  
(2) 症例割付方法

本研究は、研究参加施設をクラスターとしたクラスターランダム化試験である。患者の各施設への搬入前から、当該施設の輸血戦略は定まっており、症例ごとの割り付けは行わない。研究対象となる患者が搬入された際には、可及的速やかに研究への同意を取得し、各施設に割り当てられている輸血戦略で対応する。

10  
11  
12  
13  
14  
15  
16  
17  
18  
19  
20  
21  
22  
23  
24  
25  
26  
27  
28  
29  
30  
31  
32  
33  
34  
35  
36  
37  
38  
39  
40  
41  
42  
43  
44  
45  
46  
47  
48  
49  
50  
51  
52  
53  
54  
55  
56  
57  
58  
59  
60  
(3) 盲検化

盲検化は行わない。

## 7. 観察及び検査項目

### ①施設情報

病院の性質(大学病院 or 非大学病院)

病院全体のベッド数

ICUの性質

重症外傷患者が最初に入院するICUベッド数

O(+)赤血球緊急輸血の可否

AB-FFP緊急輸血の可否

クリオプレシピテート使用の可否

フィブリノゲン濃縮製剤使用の可否

大量輸血プロトコルの有無

1人の外傷初期診療に対応する平均的な救急医の数

2017年のISS $\geq$ 9以上の外傷患者数

ベットサイド検査の可否(ヘモグロビン、フィブリノゲン、他の凝固系検査)

### ②患者基本情報

年齢、性別、受傷年月日、受傷から病着までの時間

外傷分類(鈍的/穿通性)、抗血栓薬内服の有無、共存症の有無、受傷機転

### ③来院時病態

収縮期血圧、呼吸数、心拍数、Glasgow Coma Scale、RTS(計算値)

### ④検査と処置

FAST実施の有無、6時間以内の止血目的の手術/IVR、6時間以内のその他の手術

### ⑤TBSS関連(欠測を許容)

FAST陽性部位数、1L輸液後の収縮期血圧、骨盤骨折(AO分類)

### ⑥損傷と重症度

頭頸部AIS、頭部のみのAIS(純粋なDAIは除く)、顔面AIS、胸部AIS、腹部AIS

骨盤AIS、体表AIS(低体温症は除く)、ISS(計算値)、TRISS(計算値)

### ⑦搬入時検査

採血時間、血小板数、ヘモグロビン値、PT-INR、フィブリノゲン、乳酸値

### ⑧ヘモグロビン値

次の時間帯で最初に測定したヘモグロビン値  
 初回採血以降～1, 1～3, 3～6, 6～12, 12～24, 24～48, 48～72, 72～96, 96～120, 120～144,  
 144～168hr (測定方法は血球計数器、血液ガス分析装置のいずれでもよい)

⑨輸血量

6時間、12時間、24時間、48時間、7日、28日間における赤血球、新鮮凍結血漿、血小板、  
 クリオプレシピテート、フィブリノゲン濃縮剤の各総投与量

⑩7日以内における臓器不全合併の有無 (ICU入室後、最悪の状態)

腎不全 (KDIGO分類 Stage3)

呼吸不全(Berlin定義に準じてPEEP5以上でP/F $\leq$ 200)

肝不全(SOFA3点以上 T.Bil $\geq$ 6mg/dL)

⑪28日間情報

ICU退室日、退院日

28日後生存

28日間のevent-free days (人工呼吸器、カテコラミン、ICU滞在)

入院中 (最大28日間) に発症した合併症の有無

DVT、PE、脳梗塞、心筋梗塞、腸管虚血、TRALI、Sepsis

(TRALI以外は有り無し。TRALIはTRALI/possible/なしの3項目)

⑫退院時情報

退院日、退院後転出先(死亡退院含む)、入院日数(計算値)

退院時 Glasgow Outcome Scale (GOS)

⑬意図的なヘモグロビン目標値の逸脱

意図的なヘモグロビン目標値の逸脱が生じた場合、その時期と詳細 (具体的に記載)。

⑭積極的治療の撤退

経過中に積極的治療の撤退を選択した場合、その日時。

病院搬入の日時

上記のデータはElectronic Data Capture (NorthNet) を用いて収集する。

観察及び検査スケジュール表

| 評価時期    | 搬入時 | 観察期間 (28日もしくは退院まで) |      |      |      |    |     |     |
|---------|-----|--------------------|------|------|------|----|-----|-----|
|         |     | 6hr                | 12hr | 24hr | 48hr | 7日 | 退院時 | 28日 |
| 同意      | ○   |                    |      |      |      |    |     |     |
| 患者基本情報  | ○   |                    |      |      |      |    |     |     |
| 来院時病態   | ○   |                    |      |      |      |    |     |     |
| 検査と処置   | ←○→ |                    |      |      |      |    |     |     |
| 損傷と重症度  | ○   |                    |      |      |      |    |     |     |
| TBSS 関連 | ○   |                    |      |      |      |    |     |     |
| 搬入時検査   | ○   |                    |      |      |      |    |     |     |

|                          |     |   |   |   |   |   |   |  |
|--------------------------|-----|---|---|---|---|---|---|--|
| ヘモグロビン値                  | ←○→ |   |   |   |   |   |   |  |
| 搬入後の総輸血量                 | ○   | ○ | ○ | ○ | ○ | ○ | ○ |  |
| 臓器不全の有無                  | ←○→ |   |   |   |   |   |   |  |
| 28日後生存                   |     |   |   |   |   |   | ○ |  |
| Event-free days          | ←○→ |   |   |   |   |   |   |  |
| 合併症の有無                   | ←○→ |   |   |   |   |   |   |  |
| 退院日                      |     |   |   |   |   |   | ○ |  |
| 転出先                      |     |   |   |   |   |   | ○ |  |
| GOS                      |     |   |   |   |   |   | ○ |  |
| 意図的な<br>ヘモグロビン<br>目標値の逸脱 | ←○→ |   |   |   |   |   |   |  |
| 積極的治療の<br>撤退             | ←○→ |   |   |   |   |   |   |  |

## 8. 予想される利益及び不利益（負担及びリスク）

### (1) 予想される利益

目標ヘモグロビン低値輸血戦略の場合、輸血頻度が減少し、輸血関連合併症が減少する可能性がある。一方、目標ヘモグロビン高値輸血戦略の場合、酸素運搬能が増加し、臓器障害が回避できる可能性がある。研究実施に伴う明らかな負担はない。

### (2) 予想される不利益（負担及びリスク）

目標ヘモグロビン低値輸血戦略の場合、低いヘモグロビン値のため酸素運搬能が低下し、臓器障害を来たすリスクがある。一方、目標ヘモグロビン高値輸血戦略の場合、輸血頻度の増加に伴い、輸血関連合併症が増加するリスクがある。研究実施に伴う明らかな負担はない。

### (3) 利益及び不利益の総合的評価と不利益に対する対策

両群の予想される不利益のバランスは、現時点の医学的な知見から許容できる範囲のものである。

## 9. 評価項目（エンドポイント）

### (1) 主要評価項目

病院搬入後28日生存率

### (2) 副次的評価項目

- ①病院搬入後28日間の生存時間
- ②院内生存率
- ③赤血球、新鮮凍結血漿、血小板、それぞれの総輸血量(病院搬入後1, 7, 28日間)
- ④病院搬入後28日間のevent-free days（人工呼吸器、カテコラミン、ICU滞在）
- ⑤各臓器不全合併の有無
- ⑥入院中（最大病院搬入後28日間）に発症した合併症の有無
- ⑦退院時 GOS

## 10. 個々の研究対象者における中止基準及び研究実施後の対応

### (1) 研究中止時の対応

研究担当者は、次に挙げる理由で個々の研究対象者について研究継続が不可能と判断した場合には、当該研究対象者についての研究を中止する。その際は、必要に応じて中止の理由を研究対象者に説明する。また、中止後の研究対象者の治療については、研究対象者の不利益とならないよう、誠意を持って対応する。

## (2) 中止基準

- ① 研究対象者から研究参加の辞退の申し出や同意の撤回があった場合
- ② 本研究全体が中止された場合
- ③ その他の理由により、研究担当者が研究の中止が適当と判断した場合

## (3) 研究実施後の対応

は本研究実施後は、この研究で得られた成果も含めて、研究責任者は研究対象者に対し最も適切と考える医療を提供する。

## 11. 個々の研究対象者における研究によって得られた検査結果の取扱い

実施する検査は、この研究に参加せずに治療を受ける場合と同等であり、検査結果は、日常診療と同様に患者に開示される。

## 12. 有害事象発生時の取扱い

### (1) 有害事象発生時の研究対象者への対応

有害事象とは、実施された研究との因果関係の有無を問わず、研究対象者に生じた全ての好ましくない又は意図しない傷病もしくはその徴候（臨床検査値の異常を含む。）とする。

研究担当者は、有害事象を認めたときは、直ちに適切な処置を行うとともに、診療録等に記載する。また、有害事象に対する治療が必要となった場合には、研究対象者にその旨を伝える。

### (2) 重篤な有害事象の報告

重篤な有害事象は、次の通りに定義する。ただし、外傷に直接起因することが明らかなものは除外する。

- 1) 死に至るもの
- 2) 生命を脅かすもの
- 3) 治療のための入院又は入院期間の延長が必要となるもの
- 4) 永続的又は顕著な障害・機能不全に陥るもの
- 5) 子孫に先天異常を来すもの

研究担当者は、重篤な有害事象の発生を知った場合には、研究対象者等への説明等、必要な措置を講じるとともに、速やかに研究責任者に報告する。

研究責任者は、侵襲を伴う研究の実施において重篤な有害事象の発生を知った場合には、速やかに、その旨を研究機関の長に報告するとともに、適切な対応を図り、また、速やかに当該研究の実施に携わる研究担当者等に対して、当該有害事象の発生に係る情報を共有する。

他の研究機関と共同で実施する侵襲を伴う研究の実施において重篤な有害事象の発生を知った場合には、速やかに当該研究を実施する共同研究機関の研究責任者に対して、当該有害事象の発生に係る情報を共有する。

想定される有害事象としては、脳梗塞、肝障害、急性肺傷害、急性腎傷害、胃腸障害、心不全、不整脈、敗血症、輸血関連合併症（溶血性副作用、輸血関連急性肺傷害、輸血関連循環過負荷、アナフィラキシー、輸血後GVHD、高カリウム血症）などが挙げられる。

1  
2 (3) 重要な有害事象の報告

3 該当なし

4  
5 (4) その他の有害事象

6 その他の有害事象については、研究担当者は適切に診療録等に記載する。  
7  
8

9 **13. 研究実施計画書等の承認・変更、改訂**

10 研究責任者は、予め臨床研究計画書等を研究機関の長へ提出し、研究の実施に関して審  
11 査委員会の承認及び研究機関の長の許可を得る。また、研究実施計画書等の変更又は改訂  
12 を行う場合は、速やかに定められた作業手順にしたがって研究機関の長に改訂版を提出し、  
13 審査委員会の承認及び、研究機関の長の許可を得る。  
14  
15

16 **14. 研究の中止・中断、終了**

17 (1) 研究の中止、中断

18 研究担当者は、以下の事項に該当する場合は、研究実施継続の可否を検討する。

19 ①安全性及び有効性に関する事項及びその他の重要な情報を知りえたとき。

20 ②研究対象者の組み入れが困難で、予定症例数に達することが極めて困難であると判  
21 断されたとき。

22 ③予定症例数又は予定期間に達する前に、研究の目的が達成されたとき。

23 ④審査委員会により、実施計画等の変更の指示があり、これを受入れることが困難と  
24 判断されたとき。

25 研究責任者は、審査委員会により中止の勧告あるいは指示があった場合は、研究を中止  
26 する。また、研究の中止又は中断を決定した時は、速やかに研究機関の長にその理由ととも  
27 に文書で報告する。  
28

29 (2) 研究の終了

30 研究の終了時には、研究責任者は速やかに研究終了報告書を研究機関の長に提出する。  
31  
32

33 **15. 研究実施期間**

34 2019年5月7日から2022年12月31日まで(症例登録締切日:各施設の症例登録開始後2年1ヶ月)  
35  
36

37 **16. 目標症例数とその設定根拠及び統計解析方法**

38 (1) 目標症例数および参加施設数とその設定根拠

39 研究全体で目標ヘモグロビン低値輸血戦略200例、目標ヘモグロビン高値輸血戦略200例の  
40 合計400例。本院で合計30例。  
41

42 **【設定根拠】**

43 日本外傷学会が主導した多施設共同観察研究(15施設、1年間のデータ)では、重症外傷  
44 症例796例のうち24時間以内に241例が赤血球輸血を受けており、28日死亡率は約25%で  
45 あった<sup>1)</sup>。この死亡率を目標ヘモグロビン高値輸血戦略群の死亡率と仮定し、主要評価項  
46 目である28日生存率において目標ヘモグロビン低値輸血戦略の非劣性を示すため、非劣  
47 性マージンを3%、ICC<sub>c</sub>とICC<sub>p</sub>を共に0.05、参加施設を17施設と設定すると、片側有意水  
48 準2.5%で検出力80%を達成する必要症例数は各群170例となる。脱落例、不適格例の発生を  
49 見込んで、目標症例数を各群200例、合計400例とした。  
50

51 なお症例数の計算方法は既報<sup>5)</sup>を参照した。過去のデータから推測すると、2年間で達  
52 成可能な症例数である。  
53  
54

55 (2) 統計解析方法  
56  
57  
58  
59  
60



1  
2  
3  
4  
5  
6  
7  
8  
9  
10  
11  
12  
13  
14  
15  
16  
17  
18  
19  
20  
21  
22  
23  
24  
25  
26  
27  
28  
29  
30  
31  
32  
33  
34  
35  
36  
37  
38  
39  
40  
41  
42  
43  
44  
45  
46  
47  
48  
49  
50  
51  
52  
53  
54  
55  
56  
57  
58  
59  
60

主要評価に関して、施設および施設\*時期をランダム効果、時期および輸血戦略を固定効果とした混合効果モデルによる解析を実施する<sup>6)</sup>。P<sub>0</sub>およびP<sub>1</sub>をそれぞれ対照群、介入群の28日生存率とし、帰無仮説H<sub>0</sub>: P<sub>0</sub> - P<sub>1</sub> < 0.03 に対する検定と信頼区間の算出を行い、非劣性の判定をする。主要評価解析対象は最大の解析対象集団 (Full Analysis Set) とし、主要評価項目である28日生存が欠測の症例は、脱落症例として扱い、主要評価項目の解析から除外する。主解析は、意図的なヘモグロビン目標値の逸脱が生じた症例も含めて実施する(Intention-to-treat分析)が、副次解析として意図的なヘモグロビン目標値の逸脱が生じた症例を除外したPer protocol解析も実施する。

副次評価項目①に関して、Kaplan-Meier法により生存曲線を作成し、Log-rank検定により検討する。②院内生存数を集計する。③に関して、赤血球、新鮮凍結血漿、血小板、それぞれの総輸血量(1,7,28日間)の各時点における要約統計量を算出し、経時的にプロットしたグラフを作成する。④28日間のevent-free days (人工呼吸器、カテコラミン、ICU滞在)の要約統計量を計算する⑤各臓器不全の合併の有無を集計する⑥合併症の集計をする⑦退院時GOSの集計をする。各解析において、欠測は除外して解析を行う。

事前に規定されたサブグループ (性別: 男女、年齢: <60才 or ≥60歳、ISS: <16 or ≥16、頭部外傷 (頭部AIS≥4) 合併の有無、6時間以内の止血手術/IVRの有無) に対する輸血戦略による効果の違いを確認するためにサブグループ解析を実施する。サブグループごとの治療効果の推定およびp値を算出する。その際、サブグループを全て共変量として投入したモデル (調整済み) と他の共変量を含めないモデル (無調整) の両方に対する解析を実施する。

また、予定された実施施設数および被験者数と実際の実施施設数および被験者数が異なる場合は、post hocにパワーアナリシスをする場合がある。

## 17. 研究対象者の人権に対する配慮

本研究のすべての担当者は、「ヘルシンキ宣言 (2013年10月修正)」及び「人を対象とする医学系研究に関する倫理指針 (平成26年文部科学省・厚生労働省告示第3号)」を遵守して実施する。

## 18. 個人情報の取扱い

研究実施に係る情報は、誰のものか一見して判別できないよう、氏名・住所等をまったく別の管理番号 (研究用ID) に置き換えたうえで管理する。

対応表は、研究責任者が厳重に保管するよう監督する。共同研究機関・共同研究者に提供する場合は、この管理番号を使用する。

また、研究責任者等が本研究で得られた情報を公表する際は、研究対象者を特定できる情報を含まないようにする。

## 19. 同意取得方法

研究担当者は、審査委員会で承認の得られた同意説明文書を研究対象者 (代諾者が必要な場合は代諾者を含む、以下同じ) に渡し、文書及び口頭による十分な説明を行い、研究対象者の自由意思による同意を文書で取得する。研究担当者は、同意の取得に際して慎重に対応する。代諾者から同意を得た場合は、患者の全身状態が改善して、十分な判断能力がある状態で改めて患者自身に本研究について説明し、同意を得るように努める。

研究担当者は、研究対象者の同意に影響を及ぼす情報が得られたときや、研究対象者の

同意に影響を及ぼすような実施計画等の変更が行われるときは、速やかに研究対象者に情報提供し、研究に参加するか否かについて研究対象者の意思を予め確認するとともに、事前に審査委員会の承認を得て同意説明文書等の改訂を行い、研究対象者の再同意を得ることとする。

- ① 研究の名称及び当該研究の実施について研究機関の長の許可を受けている旨
- ② 研究機関の名称及び研究責任者の氏名（他の研究機関と共同して研究を実施する場合には、共同研究機関の名称及び共同研究機関の研究責任者の氏名を含む。）
- ③ 研究の目的及び意義
- ④ 研究の方法（研究対象者から取得された試料・情報の利用目的を含む。）及び期間
- ⑤ 研究対象者として選定された理由
- ⑥ 研究対象者に生じる負担並びに予測されるリスク及び利益
- ⑦ 研究が実施又は継続されることに同意した場合であっても随時これを撤回できる旨（研究対象者等からの撤回の内容に従った措置を講じることが困難となる場合があるときは、その旨及びその理由）
- ⑧ 研究が実施又は継続されることに同意しないこと又は同意を撤回することによって研究対象者等が不利益な取扱いを受けない旨
- ⑨ 研究に関する情報公開の方法
- ⑩ 研究対象者等の求めに応じて、他の研究対象者等の個人情報等の保護及び当該研究の独創性の確保に支障がない範囲内で研究計画書及び研究の方法に関する資料を入手又は閲覧できる旨並びにその入手又は閲覧の方法
- ⑪ 個人情報等の取扱い（匿名化する場合にはその方法、匿名加工情報又は非識別加工情報を作成する場合にはその旨を含む。）
- ⑫ 試料・情報の保管及び廃棄の方法
- ⑬ 研究の資金源等、研究機関の研究に係る利益相反及び個人の収益等、研究者等の研究に係る利益相反に関する状況
- ⑭ 研究対象者等及びその関係者からの相談等への対応
- ⑮ 侵襲を伴う研究の場合には、当該研究によって生じた健康被害に対する補償の有無及びその内容
- ⑯ 研究対象者から取得された試料・情報について、研究対象者等から同意を受ける時点では特定されない将来の研究のために用いられる可能性又は他の研究機関に提供される可能性がある場合には、その旨と同意を受ける時点において想定される内容
- ⑰ 研究対象者の秘密が保全されることを前提として、モニタリングに従事する者及び審査委員会が、必要な範囲内において当該研究対象者に関する試料・情報を閲覧する旨

尚、本研究において以下の項目は該当しないことから、説明を省略する。

- ① 研究対象者等に経済的負担又は謝礼がある場合には、その旨及びその内容
- ② 通常の診療を超える医療行為を伴う研究の場合には、他の治療方法等に関する事項
- ③ 通常の診療を超える医療行為を伴う研究の場合には、研究対象者への研究実施後における医療の提供に関する対応
- ④ 研究の実施に伴い、研究対象者の健康、子孫に受け継がれ得る遺伝的特徴等に関する重要な知見が得られる可能性がある場合には、研究対象者に係る研究結果（偶発的所見を含む。）の取扱い

## 20. 研究対象者の健康被害への対応と補償

本研究の実施に伴い、研究対象者に健康被害が発生した場合は、研究担当者は適切な処置を講じる。その際、治療又は検査等が必要となった場合は、研究対象者の通常の保険診療内で実施する。以上のことから、本研究では研究対象者の健康被害に対する金銭的な補償は準備しない。この点を研究対象者に説明し、理解を得ることとする。

## 21. 研究機関の長への報告内容及び方法

### (1) 進捗状況等の報告

研究責任者は、少なくとも年に1回、研究の進捗状況及び研究の実施に伴う有害事象の発生状況を研究機関の長に文書で報告する。

### (2) 重篤な有害事象の報告

研究責任者は、侵襲を伴う研究の実施において重篤な有害事象の発生を知った場合には、速やかにその旨を研究機関の長に報告する。

### (3) 研究の倫理的妥当性若しくは科学的合理性を損なう事実等の情報を得た場合

研究責任者は、研究の倫理的妥当性若しくは科学的合理性を損なう事実若しくは情報又は損なうおそれのある情報であって研究の継続に影響を与えると考えられるものを得た場合には、遅滞なくその旨を研究機関の長に報告する。

### (4) 研究の実施の適正性若しくは研究結果の信頼を損なう事実等の情報を得た場合

研究担当者は、研究の実施の適正性若しくは研究結果の信頼を損なう事実若しくは情報又は損なうおそれのある情報を得た場合には、速やかにその旨を研究機関の長に報告する。

### (5) 研究終了（中止の場合を含む、以下同じ。）の報告

研究責任者は、研究を終了したときは、14に従ってその旨及び研究の結果概要を文書により遅滞なくその旨を研究機関の長に報告する。

### (6) 研究に用いる試料及び情報の管理状況

研究責任者は、人体から取得された試料及び情報等の保管について、24.(1)(2)に従って必要な管理を行い、管理状況について研究機関の長に報告する。

### (7) 研究結果の公表の報告

研究責任者は、結果の最終の公表を行ったときは、25に従って遅滞なく研究機関の長へ報告する。また、最終の公表を行ったとして報告した後に、研究結果の公表を行うこととなった場合は、速やかにその旨を研究機関の長に報告する。

## 22. 効果・安全性評価委員会

研究責任者は、報告された有害事象に対する見解と対応などを第三者である効果・安全性評価委員会に報告し、研究責任者の見解と対応の妥当性について審査を依頼する。効果・安全性評価委員会は、報告内容を審査・検討し、今後の対応について研究責任者に文書で勧告する。

## 23. 研究対象者の費用負担

本研究で用いる医薬品の投与及び実施する検査は保険診療内で行われるため、研究に参加することによる研究対象者の費用負担は発生しない。

## 24. 試料・情報等の保管及び廃棄の方法

### (1) 試料・情報の授受の記録

共同研究機関及び既存試料・情報の提供のみを行う者と試料・情報の授受を行う場合は、試料・情報の授受の記録（提供先の研究機関の名称、提供先の研究機関の研究責任

者の氏名、提供元の機関の名称等、提供元の機関の研究責任者の名称等、試料・情報の項目、試料・情報の取得の経緯等の記録)について、本研究計画書及び署名済み同意書同意説明文書をもって記録の代用とし、(3)に従い保管する。

(2) 試料の保管及び廃棄の方法

該当なし

(3) 情報等の保管及び廃棄の方法

研究責任者は、定められた保管方法に従って研究担当者等が情報等(病院長からの通知文書、各種申請書・報告書の控え、実施計画書、同意説明文書、対応表、署名済み同意書、症例報告書等の控え、原資料、その他データの信頼性を保証するのに必要な書類又は記録、他の研究機関との試料・情報の授受の記録等を含む)を正確なものにするよう指導し、情報等の漏えい、混交、盗難、紛失等が起こらないよう必要な管理を行う。

本研究で得られた情報等は、救急科医局内の施錠ができるキャビネットに保管する。

研究責任者は、研究に用いられる情報等については、可能な限り長期間保管し、少なくとも、当該研究の終了について報告された日から5年を経過した日又は当該研究の結果の最終の公表について報告された日から3年を経過した日のいずれか遅い日までの期間、適切に保管する。

廃棄する際は、匿名化し個人情報の取り扱いに注意して行う。

(4) 試料及び情報の二次利用について

本研究で得られた研究対象者の情報は、同意を受ける時点では特定されない将来の研究のために用いる可能性がある。その場合には、改めて研究計画書を作成又は変更し、必要に応じて審査委員会の承認及び、研究機関の長の許可を得る。

また、他の研究機関に情報を提供する場合には、研究機関の長に報告し匿名化した上で提供する。

## 25. 研究に関する情報公開の方法及び研究結果の公表

研究責任者は、公開データベースに当該研究の概要をその実施に先立って登録し、研究計画書の変更及び研究の進捗に応じて適宜更新する。研究を終了したときは、遅滞なく、当該研究の結果を登録する。また、結果を公表する際は、研究対象者等及びその関係者の人権又は研究担当者等及びその関係者の権利利益の保護のために必要な措置を講じた上で行う。結果の最終の公表を行ったときは、遅滞なく研究機関の長へ報告する。

登録する公開データベースは、大学病院医療情報ネットワーク(UMIN-CTR)とする。

## 26. 研究資金及び利益相反

本研究は、研究責任者が所属する診療科の研究費などで実施する。また、利益相反審査の取り扱いは、各施設の規定に従って実施する。北海道大学病院の研究担当者は、「北海道大学病院における臨床研究に係る利益相反マネジメント内規」の規定にしたがって、利益相反審査委員会に必要事項を申告し、その審査と承認を得るものとする。

本研究で知的所有権が発生した場合、その権利は研究者に帰属し、研究対象者には帰属しない。

## 27. モニタリング

統括責任者は、研究の信頼性の確保に努め、研究対象者の人権、安全および福祉が保護されていること、本研究が研究実施計画書を遵守して実施されていること、および研究担

1  
2 当者から報告されたデータが正確に収集されていることを確認することを目的としてモ  
3 ニタリングを実施する。統括責任者は、適切にモニタリングが行われるようモニタリング  
4 担当者を指名するものとする。モニタリング担当者は、予め作成されたモニタリング手順  
5 書に従ってモニタリングを実施する。  
6  
7

## 8 28. 監査

9 該当なし  
10  
11

## 12 29. 研究実施体制

13 本研究は以下の体制で実施する。

### 14 【統括責任者】（研究の最終的な責任者）

15 東北大学大学院 医学系研究科外科病態学講座 救急医学分野

16 教授 久志本 成樹

17 〒980-8574 仙台市青葉区星陵町 1 - 1

18 TEL: 022-717-7489 FAX: 022-717-7492

19 E-mail: [kussie@emergency-medicine.med.tohoku.ac.jp](mailto:kussie@emergency-medicine.med.tohoku.ac.jp)  
20  
21  
22

### 23 【研究事務局】

24 北海道大学病院 救急科

25 講師 早川峰司

26 〒060-8648 札幌市北区北14条西5丁目

27 TEL: 011-706-7377 FAX: 011-706-7378

28 E-mail: [mineji@dream.com](mailto:mineji@dream.com)  
29  
30  
31  
32

### 33 【研究事務局 割り付け担当者】

34 日本医科大学武蔵小杉病院 救命救急センター/東京大学大学院医学系研究科公共健康医学  
35 専攻臨床疫学・経済学分野 田上 隆

36 〒211-8533 神奈川県川崎市中原区小杉町1-396

37 TEL: 044-733-5181

38 E-mail: [t-tagami@nms.ac.jp](mailto:t-tagami@nms.ac.jp)  
39  
40  
41  
42

### 43 【データマネジメント実施施設】

44 北海道大学病院 救急科

45 〒060-8648 札幌市北区北14条西5丁目

46 TEL: 011-706-7377 FAX: 011-706-7378  
47  
48  
49

### 50 【統計解析責任者】

51 日本医科大学武蔵小杉病院 救命救急センター/東京大学大学院医学系研究科公共健康医学  
52 専攻臨床疫学・経済学分野 田上 隆

53 〒211-8533 神奈川県川崎市中原区小杉町 1-396

54 TEL: 044-733-5181

55 E-mail: [t-tagami@nms.ac.jp](mailto:t-tagami@nms.ac.jp)  
56  
57  
58  
59  
60

## 【統計解析アドバイザー】

アステラス・アムジェンバイオフーマ株式会社

飯島 弘章

(北海道大学病院 臨床研究開発センター 生物統計部門より年月に異動)

〒100-0005 東京都千代田区丸の内1-7-12 サピアタワー

TEL: 03-5293-9866 FAX: 03-6730-9645

E-mail: [hiroaki.ijima@mail.utoronto.ca](mailto:hiroaki.ijima@mail.utoronto.ca)

(北海道大学病院 臨床研究開発センター 生物統計部門より2018年10月に異動)

\*飯島弘章は個人情報を扱わない。

## 【モニタリング実施施設】

北海道大学病院 救急科

〒060-8648 札幌市北区北14条西5丁目

TEL: 011-706-7377 FAX: 011-706-7378

## 【効果・安全性評価委員会】

国立国際医療研究センター 救命救急センター

救命救急センター長 木村 昭夫 (一般社団法人日本外傷学会 代表理事)

〒162-8655 東京都新宿区戸山1-21-1

TEL: 03-3202-7181

E-mail: [akimura@hosp.ncgm.go.jp](mailto:akimura@hosp.ncgm.go.jp)

防衛医科大学校 防衛医学研究センター 外傷研究部門

教授 齋藤 大蔵

〒359-8513 埼玉県所沢市並木3-2

TEL: 04-2995-1211

E-mail: [ds0711@ndmc.ac.jp](mailto:ds0711@ndmc.ac.jp)

## 【参加施設】

|                 |            |       |
|-----------------|------------|-------|
| 北海道大学病院         | 救急科        | 早川峰司  |
| 東北大学病院          | 高度救命救急センター | 久志本成樹 |
| 岡山大学病院          | 高度救命救急センター | 湯本哲也  |
| 順天堂大学医学部附属浦安病院  | 救命救急センター   | 近藤 豊  |
| 千葉大学医学部附属病院     | 救急科・集中治療部  | 栗田健郎  |
| 東京医科歯科大学医学部附属病院 | 救命救急センター   | 中堤啓太  |
| 前橋赤十字病院         | 高度救命救急センター | 藤塚健次  |
| 東京都済生会中央病院      | 救命救急センター   | 入野志保  |
| 帝京大学医学部附属病院     | 高度救命救急センター | 伊藤 香  |
| 日本医科大学多摩永山附属病院  | 救命救急センター   | 中山文彦  |
| 福岡大学病院          | 救命救急センター   | 入江悠平  |
| 日本医科大学千葉北総病院    | 救命救急センター   | 上田太一郎 |
| 和歌山県立医科大学附属病院   | 高度救命救急センター | 置塩裕子  |
| 岐阜大学医学部附属病院     | 高次救命治療センター | 名知 祥  |
| 島根大学医学部附属病院     | 高度外傷センター   | 室野井智博 |

|               |            |      |
|---------------|------------|------|
| 群馬大学医学部附属病院   | 救命救急センター   | 青木 誠 |
| 大分大学医学部附属病院   | 高度救命救急センター | 柴田智隆 |
| 大阪府済生会千里病院    | 千里救命救急センター | 伊藤裕介 |
| 大阪府泉州救命救急センター |            | 福間 博 |
| 高知医療センター      | 救命救急センター   | 齋坂雄一 |
| さいたま赤十字病院     | 高度救命救急センター | 早川 圭 |
| 日本医科大学付属病院    | 高度救命救急センター | 富永直樹 |

#### 【東北大学病院における実施体制】

##### < 研究責任者 >

久志本 成樹 東北大学大学院医学系研究科外科病態学講座救急医学分野 教授

##### < 研究分担者 >

|        |                            |    |
|--------|----------------------------|----|
| 工藤 大介  | 東北大学大学院医学系研究科外科病態学講座救急医学分野 | 講師 |
| 川副 友   | 東北大学大学院医学系研究科外科病態学講座救急医学分野 | 助教 |
| 入野田 崇  | 東北大学病院 救急科・高度救命救急センター      | 講師 |
| 藤田 基生  | 東北大学病院 救急科・高度救命救急センター      | 助教 |
| 宮川 乃理子 | 東北大学病院 救急科・高度救命救急センター      | 助手 |

研究対象者（参加者）の登録方法および有害事象発生時の対応方法

東北大学大学院医学系研究科 外科病態学講座 救急医学分野

工藤 大介

電話番号：022-717-7489 E-mail: kudodaisuke@med.tohoku.ac.jp

### 30. 参考資料・文献リスト

- 1) 前川邦彦, *et al*: 外傷患者の病院死亡に関連する受傷 24 時間後のヘモグロビン、血小板、フィブリノゲンのカットオフ値の同定. *日本外傷学会雑誌* **30**: 412-8, 2016
- 2) Hebert PC, *et al*: A multicenter, randomized, controlled clinical trial of transfusion requirements in critical care. Transfusion Requirements in Critical Care Investigators, Canadian Critical Care Trials Group. *N Engl J Med* **340**: 409-17, 1999
- 3) McIntyre L, *et al*: Is a restrictive transfusion strategy safe for resuscitated and critically ill trauma patients? *J Trauma* **57**: 563-8; discussion 8, 2004
- 4) Robertson CS, *et al*: Effect of erythropoietin and transfusion threshold on neurological recovery after traumatic brain injury: a randomized clinical trial. *Jama* **312**: 36-47, 2014
- 5) Giraudeau B, *et al*: Sample size calculation for cluster randomized cross-over trials. *Stat Med* **27**: 5578-85, 2008
- 6) Morgan KE, *et al*: Choosing appropriate analysis methods for cluster randomised cross-over trials with a binary outcome. *Stat Med* **36**: 318-33, 2017



STANDARD PROTOCOL ITEMS: RECOMMENDATIONS FOR INTERVENTIONAL TRIALS

SPIRIT 2013 Checklist: Recommended items to address in a clinical trial protocol and related documents\*

| Section/item                      | Item No | Description                                                                                                                                                                                                                                                                              |        |
|-----------------------------------|---------|------------------------------------------------------------------------------------------------------------------------------------------------------------------------------------------------------------------------------------------------------------------------------------------|--------|
| <b>Administrative information</b> |         |                                                                                                                                                                                                                                                                                          |        |
| Title                             | 1       | Descriptive title identifying the study design, population, interventions, and, if applicable, trial acronym                                                                                                                                                                             | ✓      |
| Trial registration                | 2a      | Trial identifier and registry name. If not yet registered, name of intended registry                                                                                                                                                                                                     | P3     |
|                                   | 2b      | All items from the World Health Organization Trial Registration Data Set                                                                                                                                                                                                                 | ✓      |
| Protocol version                  | 3       | Date and version identifier                                                                                                                                                                                                                                                              | P12    |
| Funding                           | 4       | Sources and types of financial, material, and other support                                                                                                                                                                                                                              | P12    |
| Roles and responsibilities        | 5a      | Names, affiliations, and roles of protocol contributors                                                                                                                                                                                                                                  | P12    |
|                                   | 5b      | Name and contact information for the trial sponsor                                                                                                                                                                                                                                       | N/A    |
|                                   | 5c      | Role of study sponsor and funders, if any, in study design; collection, management, analysis, and interpretation of data; writing of the report; and the decision to submit the report for publication, including whether they will have ultimate authority over any of these activities | N/A    |
|                                   | 5d      | Composition, roles, and responsibilities of the coordinating centre, steering committee, endpoint adjudication committee, data management team, and other individuals or groups overseeing the trial, if applicable (see Item 21a for data monitoring committee)                         | Table1 |
| <b>Introduction</b>               |         |                                                                                                                                                                                                                                                                                          |        |
| Background and rationale          | 6a      | Description of research question and justification for undertaking the trial, including summary of relevant studies (published and unpublished) examining benefits and harms for each intervention                                                                                       | P5     |
|                                   | 6b      | Explanation for choice of comparators                                                                                                                                                                                                                                                    | P5     |
| Objectives                        | 7       | Specific objectives or hypotheses                                                                                                                                                                                                                                                        | P5     |



|    |                      |     |                                                                                                                                                                                                                                                                                                                                                                                |                        |
|----|----------------------|-----|--------------------------------------------------------------------------------------------------------------------------------------------------------------------------------------------------------------------------------------------------------------------------------------------------------------------------------------------------------------------------------|------------------------|
| 1  |                      |     |                                                                                                                                                                                                                                                                                                                                                                                |                        |
| 2  | Trial design         | 8   | Description of trial design including type of trial (eg, parallel group, crossover, factorial, single group), allocation ratio, and framework (eg, superiority, equivalence, noninferiority, exploratory)                                                                                                                                                                      | P6                     |
| 3  |                      |     |                                                                                                                                                                                                                                                                                                                                                                                |                        |
| 4  |                      |     |                                                                                                                                                                                                                                                                                                                                                                                |                        |
| 5  |                      |     |                                                                                                                                                                                                                                                                                                                                                                                |                        |
| 6  |                      |     |                                                                                                                                                                                                                                                                                                                                                                                |                        |
| 7  |                      |     |                                                                                                                                                                                                                                                                                                                                                                                |                        |
| 8  |                      |     | <b>Methods: Participants, interventions, and outcomes</b>                                                                                                                                                                                                                                                                                                                      |                        |
| 9  |                      |     |                                                                                                                                                                                                                                                                                                                                                                                |                        |
| 10 | Study setting        | 9   | Description of study settings (eg, community clinic, academic hospital) and list of countries where data will be collected. Reference to where list of study sites can be obtained                                                                                                                                                                                             | P6                     |
| 11 |                      |     |                                                                                                                                                                                                                                                                                                                                                                                |                        |
| 12 |                      |     |                                                                                                                                                                                                                                                                                                                                                                                |                        |
| 13 |                      |     |                                                                                                                                                                                                                                                                                                                                                                                |                        |
| 14 |                      |     |                                                                                                                                                                                                                                                                                                                                                                                |                        |
| 15 | Eligibility criteria | 10  | Inclusion and exclusion criteria for participants. If applicable, eligibility criteria for study centres and individuals who will perform the interventions (eg, surgeons, psychotherapists)                                                                                                                                                                                   | P6-7                   |
| 16 |                      |     |                                                                                                                                                                                                                                                                                                                                                                                |                        |
| 17 |                      |     |                                                                                                                                                                                                                                                                                                                                                                                |                        |
| 18 |                      |     |                                                                                                                                                                                                                                                                                                                                                                                |                        |
| 19 |                      |     |                                                                                                                                                                                                                                                                                                                                                                                |                        |
| 20 |                      |     |                                                                                                                                                                                                                                                                                                                                                                                |                        |
| 21 | Interventions        | 11a | Interventions for each group with sufficient detail to allow replication, including how and when they will be administered                                                                                                                                                                                                                                                     | P7                     |
| 22 |                      |     |                                                                                                                                                                                                                                                                                                                                                                                |                        |
| 23 |                      |     |                                                                                                                                                                                                                                                                                                                                                                                |                        |
| 24 |                      |     |                                                                                                                                                                                                                                                                                                                                                                                |                        |
| 25 |                      |     |                                                                                                                                                                                                                                                                                                                                                                                |                        |
| 26 |                      | 11b | Criteria for discontinuing or modifying allocated interventions for a given trial participant (eg, drug dose change in response to harms, participant request, or improving/worsening disease)                                                                                                                                                                                 | N/A                    |
| 27 |                      |     |                                                                                                                                                                                                                                                                                                                                                                                |                        |
| 28 |                      |     |                                                                                                                                                                                                                                                                                                                                                                                |                        |
| 29 |                      |     |                                                                                                                                                                                                                                                                                                                                                                                |                        |
| 30 |                      |     |                                                                                                                                                                                                                                                                                                                                                                                |                        |
| 31 |                      | 11c | Strategies to improve adherence to intervention protocols, and any procedures for monitoring adherence (eg, drug tablet return, laboratory tests)                                                                                                                                                                                                                              | N/A                    |
| 32 |                      |     |                                                                                                                                                                                                                                                                                                                                                                                |                        |
| 33 |                      |     |                                                                                                                                                                                                                                                                                                                                                                                |                        |
| 34 |                      |     |                                                                                                                                                                                                                                                                                                                                                                                |                        |
| 35 |                      |     |                                                                                                                                                                                                                                                                                                                                                                                |                        |
| 36 |                      | 11d | Relevant concomitant care and interventions that are permitted or prohibited during the trial                                                                                                                                                                                                                                                                                  | N/A                    |
| 37 |                      |     |                                                                                                                                                                                                                                                                                                                                                                                |                        |
| 38 |                      |     |                                                                                                                                                                                                                                                                                                                                                                                |                        |
| 39 | Outcomes             | 12  | Primary, secondary, and other outcomes, including the specific measurement variable (eg, systolic blood pressure), analysis metric (eg, change from baseline, final value, time to event), method of aggregation (eg, median, proportion), and time point for each outcome. Explanation of the clinical relevance of chosen efficacy and harm outcomes is strongly recommended | P8<br>Table2<br>Table3 |
| 40 |                      |     |                                                                                                                                                                                                                                                                                                                                                                                |                        |
| 41 |                      |     |                                                                                                                                                                                                                                                                                                                                                                                |                        |
| 42 |                      |     |                                                                                                                                                                                                                                                                                                                                                                                |                        |
| 43 |                      |     |                                                                                                                                                                                                                                                                                                                                                                                |                        |
| 44 |                      |     |                                                                                                                                                                                                                                                                                                                                                                                |                        |
| 45 |                      |     |                                                                                                                                                                                                                                                                                                                                                                                |                        |
| 46 |                      |     |                                                                                                                                                                                                                                                                                                                                                                                |                        |
| 47 |                      |     |                                                                                                                                                                                                                                                                                                                                                                                |                        |
| 48 | Participant timeline | 13  | Time schedule of enrolment, interventions (including any run-ins and washouts), assessments, and visits for participants. A schematic diagram is highly recommended (see Figure)                                                                                                                                                                                               | Figure1<br>Figure2     |
| 49 |                      |     |                                                                                                                                                                                                                                                                                                                                                                                |                        |
| 50 |                      |     |                                                                                                                                                                                                                                                                                                                                                                                |                        |
| 51 |                      |     |                                                                                                                                                                                                                                                                                                                                                                                |                        |
| 52 |                      |     |                                                                                                                                                                                                                                                                                                                                                                                |                        |
| 53 |                      |     |                                                                                                                                                                                                                                                                                                                                                                                |                        |
| 54 | Sample size          | 14  | Estimated number of participants needed to achieve study objectives and how it was determined, including clinical and statistical assumptions supporting any sample size calculations                                                                                                                                                                                          | P9                     |
| 55 |                      |     |                                                                                                                                                                                                                                                                                                                                                                                |                        |
| 56 |                      |     |                                                                                                                                                                                                                                                                                                                                                                                |                        |
| 57 |                      |     |                                                                                                                                                                                                                                                                                                                                                                                |                        |
| 58 |                      |     |                                                                                                                                                                                                                                                                                                                                                                                |                        |
| 59 |                      |     |                                                                                                                                                                                                                                                                                                                                                                                |                        |
| 60 |                      |     |                                                                                                                                                                                                                                                                                                                                                                                |                        |

|    |                                                                     |     |                                                                                                                                                                                                                                                                                                                                                                                                              |     |
|----|---------------------------------------------------------------------|-----|--------------------------------------------------------------------------------------------------------------------------------------------------------------------------------------------------------------------------------------------------------------------------------------------------------------------------------------------------------------------------------------------------------------|-----|
| 1  |                                                                     |     |                                                                                                                                                                                                                                                                                                                                                                                                              |     |
| 2  | Recruitment                                                         | 15  | Strategies for achieving adequate participant enrolment to reach target sample size                                                                                                                                                                                                                                                                                                                          | P9  |
| 3  |                                                                     |     |                                                                                                                                                                                                                                                                                                                                                                                                              |     |
| 4  |                                                                     |     |                                                                                                                                                                                                                                                                                                                                                                                                              |     |
| 5  | <b>Methods: Assignment of interventions (for controlled trials)</b> |     |                                                                                                                                                                                                                                                                                                                                                                                                              |     |
| 6  |                                                                     |     |                                                                                                                                                                                                                                                                                                                                                                                                              |     |
| 7  | Allocation:                                                         |     |                                                                                                                                                                                                                                                                                                                                                                                                              |     |
| 8  |                                                                     |     |                                                                                                                                                                                                                                                                                                                                                                                                              |     |
| 9  | Sequence generation                                                 | 16a | Method of generating the allocation sequence (eg, computer-generated random numbers), and list of any factors for stratification. To reduce predictability of a random sequence, details of any planned restriction (eg, blocking) should be provided in a separate document that is unavailable to those who enrol participants or assign interventions                                                     | P6  |
| 10 |                                                                     |     |                                                                                                                                                                                                                                                                                                                                                                                                              |     |
| 11 |                                                                     |     |                                                                                                                                                                                                                                                                                                                                                                                                              |     |
| 12 |                                                                     |     |                                                                                                                                                                                                                                                                                                                                                                                                              |     |
| 13 |                                                                     |     |                                                                                                                                                                                                                                                                                                                                                                                                              |     |
| 14 |                                                                     |     |                                                                                                                                                                                                                                                                                                                                                                                                              |     |
| 15 |                                                                     |     |                                                                                                                                                                                                                                                                                                                                                                                                              |     |
| 16 |                                                                     |     |                                                                                                                                                                                                                                                                                                                                                                                                              |     |
| 17 |                                                                     |     |                                                                                                                                                                                                                                                                                                                                                                                                              |     |
| 18 | Allocation concealment mechanism                                    | 16b | Mechanism of implementing the allocation sequence (eg, central telephone; sequentially numbered, opaque, sealed envelopes), describing any steps to conceal the sequence until interventions are assigned                                                                                                                                                                                                    | P6  |
| 19 |                                                                     |     |                                                                                                                                                                                                                                                                                                                                                                                                              |     |
| 20 |                                                                     |     |                                                                                                                                                                                                                                                                                                                                                                                                              |     |
| 21 |                                                                     |     |                                                                                                                                                                                                                                                                                                                                                                                                              |     |
| 22 |                                                                     |     |                                                                                                                                                                                                                                                                                                                                                                                                              |     |
| 23 |                                                                     |     |                                                                                                                                                                                                                                                                                                                                                                                                              |     |
| 24 | Implementation                                                      | 16c | Who will generate the allocation sequence, who will enrol participants, and who will assign participants to interventions                                                                                                                                                                                                                                                                                    | P6  |
| 25 |                                                                     |     |                                                                                                                                                                                                                                                                                                                                                                                                              |     |
| 26 |                                                                     |     |                                                                                                                                                                                                                                                                                                                                                                                                              |     |
| 27 |                                                                     |     |                                                                                                                                                                                                                                                                                                                                                                                                              |     |
| 28 | Blinding (masking)                                                  | 17a | Who will be blinded after assignment to interventions (eg, trial participants, care providers, outcome assessors, data analysts), and how                                                                                                                                                                                                                                                                    | N/A |
| 29 |                                                                     |     |                                                                                                                                                                                                                                                                                                                                                                                                              |     |
| 30 |                                                                     |     |                                                                                                                                                                                                                                                                                                                                                                                                              |     |
| 31 |                                                                     |     |                                                                                                                                                                                                                                                                                                                                                                                                              |     |
| 32 |                                                                     |     |                                                                                                                                                                                                                                                                                                                                                                                                              |     |
| 33 |                                                                     | 17b | If blinded, circumstances under which unblinding is permissible, and procedure for revealing a participant's allocated intervention during the trial                                                                                                                                                                                                                                                         | N/A |
| 34 |                                                                     |     |                                                                                                                                                                                                                                                                                                                                                                                                              |     |
| 35 |                                                                     |     |                                                                                                                                                                                                                                                                                                                                                                                                              |     |
| 36 |                                                                     |     |                                                                                                                                                                                                                                                                                                                                                                                                              |     |
| 37 | <b>Methods: Data collection, management, and analysis</b>           |     |                                                                                                                                                                                                                                                                                                                                                                                                              |     |
| 38 |                                                                     |     |                                                                                                                                                                                                                                                                                                                                                                                                              |     |
| 39 | Data collection methods                                             | 18a | Plans for assessment and collection of outcome, baseline, and other trial data, including any related processes to promote data quality (eg, duplicate measurements, training of assessors) and a description of study instruments (eg, questionnaires, laboratory tests) along with their reliability and validity, if known. Reference to where data collection forms can be found, if not in the protocol | P7  |
| 40 |                                                                     |     |                                                                                                                                                                                                                                                                                                                                                                                                              |     |
| 41 |                                                                     |     |                                                                                                                                                                                                                                                                                                                                                                                                              |     |
| 42 |                                                                     |     |                                                                                                                                                                                                                                                                                                                                                                                                              |     |
| 43 |                                                                     |     |                                                                                                                                                                                                                                                                                                                                                                                                              |     |
| 44 |                                                                     |     |                                                                                                                                                                                                                                                                                                                                                                                                              |     |
| 45 |                                                                     |     |                                                                                                                                                                                                                                                                                                                                                                                                              |     |
| 46 |                                                                     |     |                                                                                                                                                                                                                                                                                                                                                                                                              |     |
| 47 |                                                                     |     |                                                                                                                                                                                                                                                                                                                                                                                                              |     |
| 48 |                                                                     |     |                                                                                                                                                                                                                                                                                                                                                                                                              |     |
| 49 |                                                                     | 18b | Plans to promote participant retention and complete follow-up, including list of any outcome data to be collected for participants who discontinue or deviate from intervention protocols                                                                                                                                                                                                                    | P7  |
| 50 |                                                                     |     |                                                                                                                                                                                                                                                                                                                                                                                                              |     |
| 51 |                                                                     |     |                                                                                                                                                                                                                                                                                                                                                                                                              |     |
| 52 |                                                                     |     |                                                                                                                                                                                                                                                                                                                                                                                                              |     |
| 53 |                                                                     |     |                                                                                                                                                                                                                                                                                                                                                                                                              |     |
| 54 | Data management                                                     | 19  | Plans for data entry, coding, security, and storage, including any related processes to promote data quality (eg, double data entry; range checks for data values). Reference to where details of data management procedures can be found, if not in the protocol                                                                                                                                            | P7  |
| 55 |                                                                     |     |                                                                                                                                                                                                                                                                                                                                                                                                              |     |
| 56 |                                                                     |     |                                                                                                                                                                                                                                                                                                                                                                                                              |     |
| 57 |                                                                     |     |                                                                                                                                                                                                                                                                                                                                                                                                              |     |
| 58 |                                                                     |     |                                                                                                                                                                                                                                                                                                                                                                                                              |     |
| 59 |                                                                     |     |                                                                                                                                                                                                                                                                                                                                                                                                              |     |
| 60 |                                                                     |     |                                                                                                                                                                                                                                                                                                                                                                                                              |     |

|    |             |     |                                                               |       |
|----|-------------|-----|---------------------------------------------------------------|-------|
| 1  |             |     |                                                               |       |
| 2  | Statistical | 20a | Statistical methods for analysing primary and secondary       |       |
| 3  | methods     |     | outcomes. Reference to where other details of the statistical | P9-10 |
| 4  |             |     | analysis plan can be found, if not in the protocol            |       |
| 5  |             |     |                                                               |       |
| 6  |             | 20b | Methods for any additional analyses (eg, subgroup and         | P10   |
| 7  |             |     | adjusted analyses)                                            |       |
| 8  |             |     |                                                               |       |
| 9  |             | 20c | Definition of analysis population relating to protocol non-   |       |
| 10 |             |     | adherence (eg, as randomised analysis), and any statistical   | P10   |
| 11 |             |     | methods to handle missing data (eg, multiple imputation)      |       |
| 12 |             |     |                                                               |       |

### Methods: Monitoring

|    |                 |     |                                                                  |     |
|----|-----------------|-----|------------------------------------------------------------------|-----|
| 15 |                 |     |                                                                  |     |
| 16 | Data monitoring | 21a | Composition of data monitoring committee (DMC);                  |     |
| 17 |                 |     | summary of its role and reporting structure; statement of        |     |
| 18 |                 |     | whether it is independent from the sponsor and competing         | P8  |
| 19 |                 |     | interests; and reference to where further details about its      |     |
| 20 |                 |     | charter can be found, if not in the protocol. Alternatively, an  |     |
| 21 |                 |     | explanation of why a DMC is not needed                           |     |
| 22 |                 |     |                                                                  |     |
| 23 |                 |     |                                                                  |     |
| 24 |                 | 21b | Description of any interim analyses and stopping                 |     |
| 25 |                 |     | guidelines, including who will have access to these interim      | N/A |
| 26 |                 |     | results and make the final decision to terminate the trial       |     |
| 27 |                 |     |                                                                  |     |
| 28 | Harms           | 22  | Plans for collecting, assessing, reporting, and managing         |     |
| 29 |                 |     | solicited and spontaneously reported adverse events and          | P8  |
| 30 |                 |     | other unintended effects of trial interventions or trial conduct |     |
| 31 |                 |     |                                                                  |     |
| 32 |                 |     |                                                                  |     |
| 33 | Auditing        | 23  | Frequency and procedures for auditing trial conduct, if any,     |     |
| 34 |                 |     | and whether the process will be independent from                 | N/A |
| 35 |                 |     | investigators and the sponsor                                    |     |
| 36 |                 |     |                                                                  |     |

### Ethics and dissemination

|    |                 |     |                                                              |         |
|----|-----------------|-----|--------------------------------------------------------------|---------|
| 37 |                 |     |                                                              |         |
| 38 |                 |     |                                                              |         |
| 39 |                 |     |                                                              |         |
| 40 | Research ethics | 24  | Plans for seeking research ethics committee/institutional    | P10-11  |
| 41 | approval        |     | review board (REC/IRB) approval                              |         |
| 42 |                 |     |                                                              |         |
| 43 | Protocol        | 25  | Plans for communicating important protocol modifications     |         |
| 44 | amendments      |     | (eg, changes to eligibility criteria, outcomes, analyses) to | N/A     |
| 45 |                 |     | relevant parties (eg, investigators, REC/IRBs, trial         |         |
| 46 |                 |     | participants, trial registries, journals, regulators)        |         |
| 47 |                 |     |                                                              |         |
| 48 | Consent or      | 26a | Who will obtain informed consent or assent from potential    | Figure2 |
| 49 | assent          |     | trial participants or authorised surrogates, and how (see    | P11     |
| 50 |                 |     | Item 32)                                                     |         |
| 51 |                 |     |                                                              |         |
| 52 |                 |     |                                                              |         |
| 53 |                 | 26b | Additional consent provisions for collection and use of      |         |
| 54 |                 |     | participant data and biological specimens in ancillary       | N/A     |
| 55 |                 |     | studies, if applicable                                       |         |
| 56 |                 |     |                                                              |         |
| 57 |                 |     |                                                              |         |
| 58 |                 |     |                                                              |         |
| 59 |                 |     |                                                              |         |
| 60 |                 |     |                                                              |         |

|    |                               |     |                                                                                                                                                                                                                                                                                     |                  |
|----|-------------------------------|-----|-------------------------------------------------------------------------------------------------------------------------------------------------------------------------------------------------------------------------------------------------------------------------------------|------------------|
| 1  |                               |     |                                                                                                                                                                                                                                                                                     |                  |
| 2  | Confidentiality               | 27  | How personal information about potential and enrolled participants will be collected, shared, and maintained in order to protect confidentiality before, during, and after the trial                                                                                                | P7               |
| 3  |                               |     |                                                                                                                                                                                                                                                                                     |                  |
| 4  |                               |     |                                                                                                                                                                                                                                                                                     |                  |
| 5  |                               |     |                                                                                                                                                                                                                                                                                     |                  |
| 6  |                               |     |                                                                                                                                                                                                                                                                                     |                  |
| 7  | Declaration of interests      | 28  | Financial and other competing interests for principal investigators for the overall trial and each study site                                                                                                                                                                       | P12              |
| 8  |                               |     |                                                                                                                                                                                                                                                                                     |                  |
| 9  |                               |     |                                                                                                                                                                                                                                                                                     |                  |
| 10 | Access to data                | 29  | Statement of who will have access to the final trial dataset, and disclosure of contractual agreements that limit such access for investigators                                                                                                                                     | N/A              |
| 11 |                               |     |                                                                                                                                                                                                                                                                                     |                  |
| 12 |                               |     |                                                                                                                                                                                                                                                                                     |                  |
| 13 |                               |     |                                                                                                                                                                                                                                                                                     |                  |
| 14 |                               |     |                                                                                                                                                                                                                                                                                     |                  |
| 15 | Ancillary and post-trial care | 30  | Provisions, if any, for ancillary and post-trial care, and for compensation to those who suffer harm from trial participation                                                                                                                                                       | N/A              |
| 16 |                               |     |                                                                                                                                                                                                                                                                                     |                  |
| 17 |                               |     |                                                                                                                                                                                                                                                                                     |                  |
| 18 |                               |     |                                                                                                                                                                                                                                                                                     |                  |
| 19 | Dissemination policy          | 31a | Plans for investigators and sponsor to communicate trial results to participants, healthcare professionals, the public, and other relevant groups (eg, via publication, reporting in results databases, or other data sharing arrangements), including any publication restrictions | N/A              |
| 20 |                               |     |                                                                                                                                                                                                                                                                                     |                  |
| 21 |                               |     |                                                                                                                                                                                                                                                                                     |                  |
| 22 |                               |     |                                                                                                                                                                                                                                                                                     |                  |
| 23 |                               |     |                                                                                                                                                                                                                                                                                     |                  |
| 24 |                               |     |                                                                                                                                                                                                                                                                                     |                  |
| 25 |                               |     |                                                                                                                                                                                                                                                                                     |                  |
| 26 |                               |     |                                                                                                                                                                                                                                                                                     |                  |
| 27 |                               | 31b | Authorship eligibility guidelines and any intended use of professional writers                                                                                                                                                                                                      | P12              |
| 28 |                               |     |                                                                                                                                                                                                                                                                                     |                  |
| 29 |                               |     |                                                                                                                                                                                                                                                                                     |                  |
| 30 |                               | 31c | Plans, if any, for granting public access to the full protocol, participant-level dataset, and statistical code                                                                                                                                                                     | N/A              |
| 31 |                               |     |                                                                                                                                                                                                                                                                                     |                  |
| 32 |                               |     |                                                                                                                                                                                                                                                                                     |                  |
| 33 | <b>Appendices</b>             |     |                                                                                                                                                                                                                                                                                     |                  |
| 34 |                               |     |                                                                                                                                                                                                                                                                                     |                  |
| 35 | Informed consent materials    | 32  | Model consent form and other related documentation given to participants and authorised surrogates                                                                                                                                                                                  | Supplement files |
| 36 |                               |     |                                                                                                                                                                                                                                                                                     |                  |
| 37 |                               |     |                                                                                                                                                                                                                                                                                     |                  |
| 38 | Biological specimens          | 33  | Plans for collection, laboratory evaluation, and storage of biological specimens for genetic or molecular analysis in the current trial and for future use in ancillary studies, if applicable                                                                                      | N/A              |
| 39 |                               |     |                                                                                                                                                                                                                                                                                     |                  |
| 40 |                               |     |                                                                                                                                                                                                                                                                                     |                  |
| 41 |                               |     |                                                                                                                                                                                                                                                                                     |                  |
| 42 |                               |     |                                                                                                                                                                                                                                                                                     |                  |
| 43 |                               |     |                                                                                                                                                                                                                                                                                     |                  |

\*It is strongly recommended that this checklist be read in conjunction with the SPIRIT 2013 Explanation & Elaboration for important clarification on the items. Amendments to the protocol should be tracked and dated. The SPIRIT checklist is copyrighted by the SPIRIT Group under the Creative Commons "[Attribution-NonCommercial-NoDerivs 3.0 Unported](https://creativecommons.org/licenses/by-nc-nd/3.0/)" license.
