# Supplementary material for: Restrictive transfusion strategy for critically injured patients (RESTRIC) trial: a study protocol for a cluster-randomised, crossover non-inferiority trial
Source: PubMed Central journal article supplement — BMJ Open. 2020 Sep 6;10(9):e037238. doi: 10.1136/bmjopen-2020-037238 (PMC7478023; doi:10.1136/bmjopen-2020-037238), 2020-09-06
Supplement: bmjopen-2020-037238supp001.pdf [file bmjopen-2020-037238supp001.pdf]

第3版 2019年5月21日

**第Ⅱ種**

患者さんへ

「重症外傷患者に対する制限輸血戦略

クラスターランダム化

クロスオーバー非劣性試験」へのご協力をお願い

研究計画書番号： 2018-2-275

倫理委員会承認日：2019年2月20日

作成日： 2018年 12月 6日 (第1版)  
2019年 2月 16日 (第2版)  
2019年 5月 21日 (第3版)

東北大学病院は、「診療」を行う医療機関であると共に、医学の「研究」及び「教育」機関でもあります。その役割の一つに、安全で有効な新しい治療法の開発があり、他の大学や医療機関、企業等と連携し、医薬品や医療機器などの研究開発を行っています。

そして、東北大学病院では、個人情報保護体制のもと、研究の関係者が、皆様の診療に関する記録（カルテ、血液検査データ、尿検査データなど）の確認を行う場合があります。しかし、これらの関係者には守秘義務が課せられていますので、皆様の名前などの個人情報にかかわる情報は責任をもってお守りいたします。

東北大学病院における医薬品や医療機器などの研究開発は、先進的な医療の創出、医療の質の向上に欠かすことの出来ない取り組みです。地域の中核的医療機関として、高度医療を提供する役割を果たすため、皆様のご理解とご協力をお願いいたします。

## 目次

|     |                                      |    |
|-----|--------------------------------------|----|
| 1.  | 医学系研究について .....                      | 5  |
| 2.  | この研究の背景について.....                     | 5  |
| 3.  | 赤血球輸血について .....                      | 6  |
| 4.  | 研究の内容・期間について.....                    | 7  |
| 5.  | この研究に参加しない場合の他の治療方法について .....        | 13 |
| 6.  | 研究への参加の自由と同意撤回の自由について.....           | 13 |
| 7.  | 個人情報の保護・研究結果の取扱いについて .....           | 14 |
| 8.  | 研究資金と利益相反（企業等との利害関係）について .....       | 14 |
| 9.  | この研究により健康被害が発生した場合の対応について .....      | 15 |
| 10. | 研究への参加が中止となる場合について .....             | 16 |
| 11. | 将来の研究のために用いる可能性／他の研究機関に提供する可能性 ..... | 16 |
| 12. | 研究に関する費用について.....                    | 17 |
| 13. | あなたに守っていただきたい事項について .....            | 17 |
| 14. | 研究に関する情報公開の方法.....                   | 18 |
| 15. | 相談窓口 .....                           | 18 |

## 1. 医学系研究について

この研究は研究責任者が企画し実施する「医学系研究」といいます。「医学系研究」とは患者さんに参加・協力していただき、新しい治療法や診断法が「病気に対してどれだけ効くか（効果）」と「どのような種類の副作用や不具合が、どの位の割合で起こるのか（安全性）」を詳しく調べる研究のことです。また、この時に使われる医薬品／医療機器を「試験薬／試験機器」といいます。

これから説明する医学系研究は、参加される患者さんが不利益を受けないよう、倫理委員会※（医学系研究について審査する委員会）により十分検討されて承認され、研究機関の長により実施が許可されています。

※倫理委員会：

患者さんの安全を守る立場から、研究の実施や継続について、専門家や専門外の方々により科学的および倫理的観点から審議を行い、研究機関の長に意見を述べる委員会です。倫理委員会の手順書、委員名簿、委員会の議事要旨等の情報は下記のホームページに掲載されていますのでご参照ください。

- ・ 名称：東北大学病院臨床研究倫理委員会
- ・ 設置者：国立大学法人東北大学 東北大学病院長
- ・ 所在地：宮城県仙台市青葉区星陵町1-1
- ・ ホームページアドレス：<https://www.rinri.med.tohoku.ac.jp/portal/>

## 2. この研究の背景について

あなたは、重症の外傷(怪我)のため救急搬入となりました。現在、もしくは今後の出血に対し、赤血球輸血が必要と考えられる状況です。出血により貧血が進行すると、体の各所に酸素を十分に運搬することが出来なくなります。このため、必要に応じて赤血球輸血を行っています。しかし、どの程度の貧血(へ

ヘモグロビン値の低下)のときに目標をどのようにして輸血を行うのが良いのか分かっていません。

これまで明確な根拠はなく、慣習的にヘモグロビン値で10g/dL以上を目標に輸血を行っていましたが、近年、集中治療が必要な患者さんでは7g/dL以上を目標でも良いのではないかと報告が出てきています。ただし、外傷の患者さんに関しては明確な報告はなく、施設や個々の医師の裁量で、7~12g/dL程度のヘモグロビン値を目標として対応しているのが現状です。当院でも、個々の担当医師の裁量で、7~12g/dL程度のヘモグロビン値を目標として対応していました。

赤血球輸血は他人の血液を体に入れる治療のため、悪影響が出る可能性があります。しかし、赤血球が不足すると全身の大切な臓器への酸素の運搬が不十分となる可能性があります。重症の外傷（怪我）の場合も、身体にとってちょうど良い量の赤血球輸血が望ましいですが、現在そのちょうど良い量がわかっていません。

現在、東北大学病院救急科も参加する多施設共同研究では、重症の外傷（怪我）にとってちょうど良い量（効果が大きく、害が最小限）の赤血球輸血量を明らかにしようとしています。

### 3. 赤血球輸血について

赤血球は、肺から取り込まれた酸素を身体の隅々まで運ぶ役割をしています。赤血球が不足した状態を貧血とよび、脳や心臓など臓器の酸素が不足すると、生命に危険が及びことがあります。外傷では出血などが原因で貧血になる患者さんがたくさんいます。身体の中で不足した赤血球を補うために赤血球輸血を行います。輸血による副作用・合併症としては、アレルギーのような反応、感染症、肺障害などがあります。詳細は、輸血に関する説明書をご覧ください。

## 4. 研究の内容・期間について

### 1) 研究の目的について

この研究は、重症外傷患者さんにおける、輸血の目標とするヘモグロビン値の影響を検証することを目的としています。本研究を実施することで、ヘモグロビン値の目標が高い方が良いのか、低い方が良いのかが明らかになります。

多施設共同研究の統括施設は、東北大学病院高度救命救急センターです。

研究に参加される患者さんから血液検査を行います。通常の診療で調べる範囲の項目のみを検査します。それらの値と診療内容や経過の情報（5）研究の方法および観察・検査スケジュールなど、に記載）は、重症外傷における、輸血の目標とするヘモグロビン値の目標が高い方が良いのか、低い方が良いのかを解析するために用います。

### 2) 用語の説明

「クラスターランダム化」とは、個人の患者さんではなく、地域や施設など一つのまとまり(クラスター)として、無作為割付(Randomization)を実施する試験デザインです。

「クロスオーバー試験」とは、A群とB群を設定し、第1クールではA群に①を実施、B群に②を実施する。次の第二クールではA群に②を実施、B群に①を実施する。このように順次入れ替えていく試験デザインです。「非劣性試験」とは、①と②を比較する際に、主な臨床的な効果が、①が②よりもある許容限界以上に劣らないことを示すことを主要な目的とした試験デザインです。

### 3) 研究への参加基準（候補として選ばれた理由）

研究に参加いただけるのは、以下の項目にあてはまる方です。しかし、同意いただいた後でも検査の結果によっては、参加いただけない場合もありますのでご了承ください。

以下の項目に該当する方がこの研究に参加いただけます。

- (1) 外傷と診断されている方
- (2) 下記の項目のいずれかを満たしている方
  - ① 重篤な出血がある
  - ② 今後重篤な出血を起こす恐れがある
- (3) 年齢 20歳以上
- (4) 性別 男女問わない
- (5) 研究参加について本人及びご家族など代諾者から文書で同意が得られる方（この研究では上記の患者さんが対象となるため、ご自身で十分な理解の上同意をしていただくことが難しい患者さんを対象に含めるため、ご家族など代諾者から文書で同意が得られる方も対象とします）

また、以下の項目に該当する方はこの治療に参加いただけないことになっています。

- (1) 妊娠中、授乳中、研究期間中に妊娠を希望する方
- (2) 他の病院を受診した後に東北大学病院へ転院となった方
- (3) 初期診療時に積極的な加療を望まなかった方
- (4) 大きな熱傷（やけど、熱傷面積15%以上）を伴っている方
- (5) 慢性貧血（外傷を受ける前から貧血）でもととのヘモグロビン値が7mg/dL以下の方
- (6) 輸血を拒否される方
- (7) 他の研究に参加中の方
- (8) 担当医師が本研究の対象として好ましくないと判断した方

### 3) 参加予定期間



この研究にご協力いただくために必要な期間は、同意をいただいた後、28日間（4週間）となります。

それ以前に、転院/退院された場合には、電話等で状況をお問い合わせさせて頂く場合があります。

#### 4) 実施予定期間と参加予定者数

この研究は、平成30年7月から平成34年12月まで行われ、ヘモグロビン値7～9 g/dLを目標群200名、ヘモグロビン値10～12 g/dLを目標群200名、合計400名の患者さんの参加を予定しています。当院では各群15名、合計30名の患者さんの参加を予定しております。

#### 5) 研究の方法および観察・検査スケジュールなど

この研究に参加している施設では、予め、ヘモグロビン値7～9g/dLを目標として赤血球輸血を実施するか、ヘモグロビン値10～12 g/dLを目標として赤血球輸血を実施するかが決められています。

(クラスターランダム化の結果により施設毎に①、②いずれかを使用する)

① 現在を含めた1年間、我々の施設ではヘモグロビン値7～9g/dLを目標として赤血球輸血を実施しています。別の時期には、ヘモグロビン値10～12 g/dLを目標として赤血球輸血を実施します（していません）。この目標ヘモグロビン値の設定は、この研究のために設定されたものです。

② 現在を含めた1年間、我々の施設ではヘモグロビン値10～12 g/dLを目標として赤血球輸血を実施しています。別の時期には、ヘモグロビン値7～9g/dLを目標として赤血球輸血を実施します（していません）。この目標ヘモグロビン値の設定は、この研究のために設定されたものです。

このヘモグロビン値を目標とするのは、搬入後7日間（もしくは集中治療室から退室まで）です。

#### 検査および観察項目

治療前および治療中、終了後には以下の患者さんの観察、診察および検査を実施し、この研究のデータ

として活用します。ただし、研究参加に伴い、通常の診療を超えて追加される検査や処置はありません。

① 患者さんの背景情報

(搬入日、年齢、性別、受傷から病着までの時間、共存症、外傷の重症度)

② 腹部超音波検査、1L輸液後の収縮期血圧、骨盤骨折の分類

③ 血液検査 (ヘモグロビン、血小板数、PT-INR、フィブリノゲン、乳酸値)

④ 輸血量、手術の有無、

⑤ 臓器不全の有無、合併症の有無、生死

⑥ 人工呼吸器や透析、カテコラミンを使用しなかった日数

⑦ 退院日、退院後の転出先、退院時の意識状態

|                             |     | 観察期間 (28日もしくは退院まで) |      |      |      |    |     |     |
|-----------------------------|-----|--------------------|------|------|------|----|-----|-----|
| 評価時期                        | 搬入時 | 6時間                | 12時間 | 24時間 | 48時間 | 7日 | 退院時 | 28日 |
| 同意                          | ○   |                    |      |      |      |    |     |     |
| 患者基本情報                      | ○   |                    |      |      |      |    |     |     |
| 来院時病態                       | ○   |                    |      |      |      |    |     |     |
| 検査と処置                       | ←○→ |                    |      |      |      |    |     |     |
| 損傷と重症度                      | ○   |                    |      |      |      |    |     |     |
| 腹部超音波検査、1L輸液後の収縮期血圧、骨盤骨折の分類 | ○   |                    |      |      |      |    |     |     |
| 搬入時検査                       | ○   |                    |      |      |      |    |     |     |

|                           |     |   |   |   |   |   |   |   |
|---------------------------|-----|---|---|---|---|---|---|---|
| ヘモグロビン値                   | ←○→ |   |   |   |   |   |   |   |
| 搬入後の総輸血量                  |     | ○ | ○ | ○ | ○ | ○ |   | ○ |
| 臓器不全の有無                   | ←○→ |   |   |   |   |   |   |   |
| 28日後生存                    |     |   |   |   |   |   |   | ○ |
| 人工呼吸器や透析、カテコラミンを使用しなかった日数 | ←○→ |   |   |   |   |   |   |   |
| 合併症の有無                    | ←○→ |   |   |   |   |   |   |   |
| 退院日                       |     |   |   |   |   |   | ○ |   |
| 転出先                       |     |   |   |   |   |   | ○ |   |
| 退院時の意識状態                  |     |   |   |   |   |   | ○ |   |

## 6) 研究終了後の治療

この研究が終了した後は、この研究で得られた成果も含めて、担当医師は責任をもって最も適切と考える医療（通常治療）を提供いたします。

## 7) 研究参加により予想される利益と不利益・負担

<予想される利益>

① ヘモグロビン値7～9g/dLを目標の場合

赤血球輸血の頻度が減少し、輸血関連の合併症(アレルギーのような反応、血栓症の増加、免疫能の低下)が減少する可能性があります

② ヘモグロビン値10～12g/dLを目標の場合

酸素を運ぶ能力が増加して、体の各臓器が良い状況になる可能性があります。

<予想される不利益・負担>

この治療法によって起きる可能性がある副作用は、これまでの報告などから以下の症状などがあります。ただし、本研究では輸血時のヘモグロビン目標値を2群に設定するのみであり、輸血を行うこと自体は必要な状態であり、通常の診療であることはご理解ください。

① ヘモグロビン値7～9g/dLを目標の場合

酸素を運ぶ能力が低下して、体の各臓器に負担がかかる可能性があります。

② ヘモグロビン値10～12g/dLを目標の場合

赤血球輸血の頻度が増加し、輸血関連の合併症(アレルギーのような反応、血栓症の増加、免疫能の低下)が増加する可能性があります。

酸素を運ぶ能力が低下して、体の各臓器に負担がかかっていると判断した場合は、輸血を含めて通常診療どおりに対応します。輸血関連の合併症に対しては、通常診療どおりに対応します。

本研究ではモニタリングを実施します。モニタリングにより、定期的に有害事象の程度や頻度がチェックされ、予想されるレベルを超えていると判断される場合は研究中止を含む研究計画の変更が検討されます。予期されない有害事象は報告、審査され、必要に応じて研究機関への情報伝達が行われます。このよ

うに研究対象者のリスクを最小化する努力を行っています。

## 5. この研究に参加しない場合の他の治療方法について

これまでの標準的医療として、患者さんの状況に応じて担当医の裁量で、7~12 g/dL程度のヘモグロビン値を目標として、適宜、輸血を行うことになります。

## 6. 研究への参加の自由と同意撤回の自由について

- 1) この研究への参加はあなたの自由です。この説明文書をよく読んでいただき、ご家族と相談するなど十分に考えたうえ、この研究に参加するかどうかをあなた自身の自由な意思で決めてください。もし、ご不明な点があれば遠慮なくお尋ねください。参加に同意していただける場合には、同意文書に記名捺印または署名をお願いします。もしお断りになっても、今後の治療を受けるうえで不利な扱いを受けることは決してありません。
- 2) 研究の参加はいつでも取りやめることができます。この研究の参加の途中であっても、いつでも参加を取りやめることができますので、ご遠慮なく担当医師にお知らせください。
- 3) この研究への参加を希望しない場合や、研究の途中で参加をとり止める場合、その後の治療に対して何ら不利益を受けることはありません。その時点であなたにとって最善と思われる治療を行います。
- 4) ご家族などの代諾者から同意を得た場合は、患者さんの全身状態が改善して、十分な判断能力がある状態で改めて患者さん自身に本研究について説明し、同意を得るように努めます。この際、患者さん自身にも本研究参加によるメリットとデメリットを丁寧に説明します。

## 7. 個人情報の保護・研究結果の取扱いについて

研究はあなたの個人情報を守った上で行われます。

- 1) この研究で得られたデータは、匿名化して研究用IDで管理します。研究の結果は、学会や医学雑誌等にて公表される予定ですが、その際もあなたのお名前や個人を特定する情報は使用いたしません。
- 2) この研究が適正に行われているかどうかを確認するために、研究の関係者（モニタリング担当者や監査担当者、当研究機関および他機関の倫理委員会の委員など）が、あなたの記録（カルテ、血液検査データ、尿検査データなど）を閲覧することになります。このような場合でも、これらの関係者には守秘義務が課せられていますので、あなたの名前などの個人情報にかかわる情報は守られます。  
  
(個人情報管理の責任者：久志本 成樹)
- 3) 本研究では検体採取はありません（通常診療における血液検査などは行います）。データは研究終了日から5年／結果公表日から3年（いずれか遅い日）まで保管し、匿名化して廃棄いたします。
- 4) 提供された検査データ等は、匿名化したまま共同研究機関である北海道大学病院先進急性期医療センターへ送られます。そこで全ての共同研究機関の全研究参加者のデータと統合して、解析に用いられます。
- 5) あなた個人の検査データについては、通常の診療と同様に結果がわかり次第お知らせいたします。本研究では通常の診療を超えた検査は行いません。

## 8. 研究資金と利益相反（企業等との利害関係）について

本研究は、公益信託丸茂救急医学研究振興基金助成金および日本損害保険協会交通事故医療研究助成金（申請者：早川 峰司（北海道大学病院先進急性期医療センター 講師）、研究課題名：「重症外傷患者

に対する制限輸血戦略の効果検証:クラスターランダム化クロスオーバー非劣性試験)などの研究助成金および各施設の研究費などを使用し、通常診療の範囲内にて実施します。研究責任者および研究分担者において、本研究で対象とする赤血球製剤の製造販売元である日本赤十字社と利益相反があるものはいません。

本研究は、研究責任者のグループにより公正に行われます。本研究における企業等との利害関係に追加・変更が生じた場合はその都度、東北大学利益相反マネジメント委員会へ申告し審査を受けることにより、本研究の企業等と利害関係についての公正性を保ちます。この研究の結果により特許権等が生じた場合は、その帰属先は東北大学になります。あなたには帰属しません。

## 9. この研究により健康被害が発生した場合の対応について

### 1) 健康被害（副作用）が発生した場合

この研究に参加中または研究終了後に、今までになかった症状が現れたり、何か変わったことに気付いたときは、担当の医師、研究の相談窓口にお知らせください。また、研究期間中は研究が原因と考えられないことで（例えば事故、ケガなど）入院されたり、当院の他科、他の研究機関を受診されたりする場合でも、ご連絡ください。

### 2) 健康被害が発生した場合の治療および賠償、補償

この研究は、保険適用が認められた標準的な治療を行いながら実施するものです。したがって、この研究中に健康被害が発生して検査や治療などが必要となった場合の費用は、通常の診療と同様に、医療費はあなたが加入している健康保険が使用されます。この研究による特別な補償はありません。

## 10. 研究への参加が中止となる場合について

研究中であっても、以下の場合には研究を中止させていただきます。その場合であっても、試験薬／試験機器による治療を一度でも受けた方には、健康状態を確認するために、中止時の検査を行うことがあります。

- 1) あなたがこの研究への参加を取りやめたいと申し出たとき
- 2) あなたの体の具合が悪くなり、担当医師が研究をやめると決めたとき
- 3) 妊娠していることがわかったとき
- 4) 途中であなたがこの研究に参加できる人に当てはまらないことがわかったとき
- 5) 試験薬による治療後、あなたの体の具合が悪くなって、担当医師が試験薬による治療をやめたほうがよいと判断したとき
- 6) この試験薬製造販売している医薬品メーカーが製造販売を中断・中止したとき
- 7) 担当医師が研究をやめたほうがよいと判断したとき

以上の理由とは別に、この試験薬があなたに不利益をもたらすかもしれないという情報が得られたとき、研究自体を中止または中断することがあります。その場合も、あなたと相談のうえ担当医師が最善の治療を行います。

なお、この研究に関連してそれまでに集められたあなたの診療の記録や検査結果は使用させていただきます。もし、その使用について取りやめたい場合はお知らせください。

## 11. 将来の研究のために用いる可能性／他の研究機関に提供する可能性

(例1) あなたから提供された検査データ等は、同意を受ける時点では特定されない将来の研究のために



用いる可能性があります。利用する場合は、その研究計画が倫理委員会で承認された上で利用いたします。また、他の研究機関に試料・情報を提供する場合には、病院長に報告し、個人を特定できない形式にした上で提供します。

## 12. 研究に関する費用について

本研究は、通常診療の範囲内で行われる研究のため研究に参加しない場合と同じ費用をお支払いいただきます。つまり、手術や各種検査に係る費用はあなたの加入している医療保険（国民健康保険など）が用いられ、通常の診療と同様に自己負担分をお支払いいただきます。したがって、ご参加いただくにあたって、あなたの費用負担が通常の診療より増えることはありません。また、ご参加いただくにあたっての謝金などのお支払いもありません。

## 13. あなたに守っていただきたい事項について

あなたがこの研究に参加されている間、次のことを守ってください。

- 1) あなたの具合がいつもと違うとか、何か変わった症状がある場合は、すぐに連絡してください。
- 2) あなたが退院後に当病院の他の診療科や他の病院を受診される場合は、この研究の担当医師に、他の診療科や他の病院を受診予定であることをお知らせください。研究に参加いただく方の安全性の確保や研究による影響の有無を確認するために、あなたの上承を得たうえで、研究に参加していることを担当医に連絡し、治療の内容（使用した薬など）について問い合わせをさせていただくことがあります。

## 14. 研究に関する情報公開の方法

この研究の概要については、データベース（UMIN）に登録して公開しています。個人が特定される情報は公開されません。

この研究の方法等を記載した資料をご覧になりたい場合は、他の試料提供者の個人情報に関わる部分や研究の独創性確保に支障のない範囲でお見せいたします。

## 15. 相談窓口

試験薬による治療以外にもこの病気に対する治療は最善を尽くして行いますので、ご安心ください。その他、研究についてわからないこと、心配なことがありましたら、相談窓口にお問い合わせください。

（現時点で特定されない研究については実施が未定のため、他の方の個人情報については個人情報保護のため、知的財産については知的財産保護のため、お答えできないことをご了承ください。）

研究責任者：久志本 成樹（救急科教授、高度救命救急センター 部長）

担当者：工藤 大介（救急科・高度救命救急センター 講師）

### 【連絡先】

東北大学病院救急科・高度救命救急センター

〒980-8574 宮城県仙台市青葉区星陵町 1-1

平日 022-717-7024、夜間・休日 022-717-7024
