# Supplementary material for: Restrictive transfusion strategy for critically injured patients (RESTRIC) trial: a study protocol for a cluster-randomised, crossover non-inferiority trial
Source: PubMed Central journal article supplement — BMJ Open. 2020 Sep 6;10(9):e037238. doi: 10.1136/bmjopen-2020-037238 (PMC7478023; doi:10.1136/bmjopen-2020-037238), 2020-09-06
Supplement: bmjopen-2020-037238supp002.pdf [file bmjopen-2020-037238supp002.pdf]

## 同意書

東北大学病院長 殿

私は、「重症外傷患者に対する制限輸血戦略 クラスターランダム化クロスオーバー非劣性試験」について、担当医師から、以下について説明を受けました。

|                                                       |                                                                 |
|-------------------------------------------------------|-----------------------------------------------------------------|
| <input type="checkbox"/> 1. 医学系研究について                 | <input type="checkbox"/> 11. 将来の研究のために用いる可能性／<br>他の研究機関に提供する可能性 |
| <input type="checkbox"/> 2. この研究の背景について               | <input type="checkbox"/> 12. 研究に関する費用について                       |
| <input type="checkbox"/> 3. 赤血球輸血について                 | <input type="checkbox"/> 13. あなたに守っていただきたい事項について                |
| <input type="checkbox"/> 4. 研究の内容・期間について              | <input type="checkbox"/> 14. 研究に関する情報公開および資料閲覧方法                |
| <input type="checkbox"/> 5. この研究に参加しない場合の他の治療方法について   | <input type="checkbox"/> 15. 相談窓口                               |
| <input type="checkbox"/> 6. 研究への参加の自由と同意撤回の自由について     |                                                                 |
| <input type="checkbox"/> 7. 個人情報の保護・研究結果の取扱いについて      |                                                                 |
| <input type="checkbox"/> 8. 研究資金と利益相反（企業等との利害関係）について  |                                                                 |
| <input type="checkbox"/> 9. この研究により健康被害が発生した場合の対応について |                                                                 |
| <input type="checkbox"/> 10. 研究への参加が中止となる場合について       |                                                                 |

十分納得しましたので、本研究に参加することに同意します。なお、同意書の写しを受け取りました。

(本人)

同意年月日 西暦 年 月 日

住 所

氏 名 (Ⓜ) (署名または記名捺印・以下同じ)

(代諾者・本人との関係\_\_\_\_\_)

(代諾者・本人との関係\_\_\_\_\_)

同意年月日 西暦 年 月 日

同意年月日 西暦 年 月 日

住 所

住 所

氏 名 (印)

氏 名 (印)

(立会人)

住 所

氏 名 (印)

別紙同意説明文書について、私が説明しました。

担当者 診療科名 救急科 記入年月日 西暦 年 月 日

氏名 (印)

連絡先

2019年11月11日作成 2版

## 同意撤回書

東北大学病院長 殿

(本人) 郵便番号

記入年月日 西暦 年 月 日

住 所

氏 名 (印)

(署名または記名捺印・以下同じ)

(代諾者・本人との関係 \_\_\_\_\_)

記入年月日 西暦 年 月 日

住 所

氏 名 (印)

私は、「重症外傷患者に対する制限輸血戦略 クラスターランダム化クロスオーバー非劣性試験」について、同意を撤回します。なお、同意撤回書の写しを受け取りました。
